# Supplementary material for: Study on the mortality risk and predictive model for COVID-19 inpatients with pneumonia manifestations
Source: PeerJ journal article supplement (doi:10.7717/peerj.20795), 2026-02-10
Supplement: data_ML.xlsx [file data_ML.xlsx]

## Sheet: raw data
ID	Status	Age	Sex	Severe pneumonia	Sore throat	Cough	Expectoration	Poor appetite	Muscular soreness	Anhelation	Dyspnea	Respiratory failure	Heart failure	Cerebral infarction	Anaemia	Coagulation dysfunction	Diabetes	White blood cell (WBC)	Erythrocyte (RBC)	Hemoglobin (Hb)	Platelet (PLT)	Neutrophil (NEUT)	Percentage of neutrophils (NEUT%)	Lymphocyte (LYMP)	Percentage of lymphocyte (LYMP%)	Eosinophil (EO)	Percentage of eosinophil (EO%)	D-Dimer	Procalcitonin (PCT)	Creatinine (SCr)	Uric acid (UA)	Alanine aminotransferase (ALT)	Aspartate aminotransferase (AST)	Total protein (TP)	Albumin (ALB)	Creatine kinase (CK)	Creatine kinase isoenzymes (CK-MB)	Lactate dehydrogenase (LDH)
1	1	1	1	1	2	2	2	1	1	1	1	1	1	1	1	1	1	1	1	1	1	1	1	1	1	2	2	1	1	1	1	1	1	1	1	1	1	1
2	1	1	1	1	1	2	2	1	2	2	1	1	1	1	1	1	1	1	1	2	2	1	1	1	2	2	2	1	1	2	1	1	2	1	1	1	2	1
3	1	2	2	1	1	2	2	2	1	2	1	1	1	1	1	1	1	1	1	1	1	1	1	2	2	1	1	1	1	1	1	1	1	2	2	1	2	1
4	1	2	2	1	2	2	2	2	1	2	1	1	1	1	1	1	1	2	2	2	2	2	2	1	2	2	2	1	2	1	1	1	1	1	1	2	2	2
5	1	2	2	2	1	2	2	1	2	2	1	1	1	2	2	1	2	2	2	2	2	2	2	1	2	2	2	2	2	1	1	1	2	2	2	2	2	2
6	1	2	2	1	1	2	2	1	1	2	1	1	1	1	1	1	1	2	1	1	1	2	2	1	1	2	1	1	2	1	1	1	1	1	1	1	2	1
7	2	2	2	2	1	2	2	2	1	2	2	1	2	1	2	1	2	1	2	2	1	1	2	2	2	1	1	2	2	1	1	1	1	2	2	1	2	2
8	1	2	2	1	1	1	1	2	1	2	1	1	1	1	1	1	1	2	2	2	2	2	2	2	2	2	2	1	1	2	2	1	1	1	1	1	2	2
9	1	2	1	1	1	2	2	2	1	2	1	1	1	1	1	1	1	1	1	1	1	1	1	1	1	2	1	1	1	1	1	1	1	1	1	2	1	1
10	1	2	2	1	1	2	2	2	1	2	1	1	1	1	1	1	1	1	1	1	1	1	1	2	2	1	1	2	2	1	1	1	1	1	2	2	2	2
11	1	2	2	1	2	2	2	1	2	1	1	1	1	1	2	1	1	1	2	2	2	1	1	1	1	2	2	1	1	1	1	1	1	1	1	1	2	1
12	1	2	1	1	1	1	1	1	1	1	1	1	1	1	1	1	2	1	1	1	1	1	2	2	2	2	2	1	1	1	1	1	2	1	1	1	2	1
13	1	1	2	1	1	2	2	1	1	1	2	1	1	1	1	1	1	1	2	2	1	1	1	1	1	1	1	2	2	1	2	1	1	2	2	1	1	1
14	1	1	2	1	1	2	2	1	1	2	1	1	1	1	1	1	1	1	1	2	1	1	1	2	2	1	1	2	1	1	1	1	2	1	1	2	2	2
15	1	1	2	1	1	2	2	1	1	2	1	1	1	1	2	1	1	2	2	2	2	2	2	2	2	2	2	2	2	2	1	1	1	2	2	1	2	2
16	1	1	1	1	1	2	2	1	2	1	1	1	1	1	1	1	1	2	1	1	1	1	1	2	1	2	2	1	1	2	1	1	1	1	1	2	2	1
17	1	2	2	1	1	2	2	2	1	2	1	1	1	1	1	1	1	1	2	2	1	1	2	2	2	2	1	2	1	2	2	2	1	2	2	1	2	1
18	1	2	2	2	1	1	2	1	1	2	2	2	1	2	2	2	2	2	2	2	1	1	1	2	2	1	2	2	2	1	2	1	1	2	2	1	1	1
19	1	2	2	1	1	2	2	1	1	1	1	1	1	2	1	1	1	2	2	2	1	1	1	1	2	1	1	2	2	1	1	1	2	2	2	2	2	1
20	1	2	2	2	1	2	2	1	1	2	2	2	1	1	1	1	1	2	1	1	1	2	1	2	2	2	2	2	2	1	1	2	2	2	2	2	2	2
21	1	1	2	1	1	2	2	1	2	1	1	1	1	1	1	1	1	2	1	1	2	2	1	2	1	2	1	1	2	1	1	1	1	1	1	2	2	1
22	1	2	2	1	2	2	2	1	1	1	1	1	1	1	1	1	1	1	1	1	1	1	1	1	2	2	2	1	1	2	1	1	1	2	1	1	1	1
23	1	1	1	1	2	2	2	1	1	1	1	1	1	1	1	1	1	1	1	1	1	1	1	2	2	2	2	1	1	2	1	1	1	1	2	1	2	1
24	1	2	1	1	1	2	2	1	1	2	1	1	1	1	1	1	1	1	1	1	1	1	2	2	2	1	1	1	1	1	1	1	1	1	2	1	1	1
25	1	2	1	1	1	2	2	1	1	1	1	1	1	1	1	1	1	1	1	1	1	1	1	1	1	2	1	1	1	1	2	2	2	1	1	1	1	1
26	1	1	2	1	2	2	2	1	1	1	1	1	1	1	1	1	1	1	1	2	1	1	1	1	1	2	2	1	1	1	1	1	1	1	1	1	1	1
27	1	1	1	1	2	2	2	1	1	2	1	1	1	1	1	1	1	1	1	1	1	2	2	1	1	2	2	1	1	2	2	1	1	1	1	1	1	1
28	1	1	2	1	2	2	2	2	2	1	1	1	1	1	1	1	1	2	1	1	1	1	2	2	2	2	2	1	2	2	1	2	2	1	1	1	1	2
29	1	1	2	1	1	2	2	1	2	1	1	1	1	1	1	1	1	1	1	1	1	2	2	1	2	1	1	1	2	1	1	1	1	1	1	1	2	2
30	2	2	2	2	1	2	2	1	1	2	2	2	2	1	1	1	2	2	1	1	1	2	2	2	2	2	2	1	2	2	2	1	1	1	1	2	2	2
31	1	2	2	1	1	2	2	1	1	2	1	1	1	1	1	1	1	1	1	1	1	1	1	1	1	2	1	1	2	2	1	1	2	1	2	1	2	1
32	1	1	2	1	1	2	2	1	1	2	1	1	1	1	1	1	1	1	1	1	2	1	2	2	2	2	2	1	1	1	1	1	1	1	1	1	1	1
33	1	2	2	1	1	2	2	2	1	1	1	1	1	1	1	1	1	1	1	1	1	1	1	1	2	2	2	2	2	2	2	1	1	1	1	2	2	2
34	1	2	1	2	1	2	2	2	1	1	1	1	1	2	2	1	1	2	2	2	1	2	2	2	2	2	2	2	2	2	2	1	1	2	2	2	1	2
35	1	2	2	2	2	2	2	2	1	2	1	2	1	2	2	1	1	2	2	2	1	2	2	2	2	2	2	2	1	2	1	1	1	2	2	2	2	2
36	1	1	1	1	1	2	2	1	1	2	1	1	1	1	1	1	1	1	1	1	2	1	1	1	1	2	1	1	1	2	1	1	1	1	1	1	2	1
37	2	2	2	1	1	2	1	2	2	2	1	1	1	1	1	1	1	1	1	1	1	1	1	1	1	1	1	2	2	1	1	1	2	2	2	1	1	2
38	1	1	2	1	2	1	1	1	2	2	1	1	1	1	1	1	1	1	2	1	1	1	1	2	2	1	1	1	1	1	1	1	1	1	1	1	1	1
39	1	2	2	1	1	2	2	1	1	2	1	1	1	1	1	1	1	1	1	1	1	1	1	1	1	1	1	1	1	1	2	1	1	1	1	2	2	1
40	1	1	2	1	1	2	2	1	1	2	1	1	1	1	2	1	1	2	2	2	1	2	2	2	2	2	2	2	2	2	2	1	1	1	1	2	2	2
41	1	2	2	1	2	2	2	2	2	2	1	1	1	1	1	1	2	1	2	1	1	1	2	2	2	2	2	1	2	1	1	1	1	1	1	2	2	2
42	1	2	2	1	1	2	2	2	1	2	1	2	1	2	1	1	1	2	1	2	1	2	2	2	2	2	2	2	2	1	1	1	1	1	1	1	1	1
43	1	1	1	1	2	2	2	1	1	2	1	1	1	1	1	1	1	2	1	1	1	2	2	1	2	2	2	1	2	2	1	1	1	1	1	2	2	2
44	1	2	2	1	1	2	2	1	1	2	2	1	1	1	1	1	1	2	1	1	2	2	2	2	2	2	2	2	2	2	1	1	1	1	1	2	2	1
45	1	1	2	1	1	2	1	2	1	2	1	1	1	1	1	1	1	2	1	1	2	2	1	2	2	1	2	2	1	2	1	1	1	1	1	1	2	1
46	1	2	1	1	1	2	1	1	1	1	1	2	1	2	2	1	2	2	2	2	1	2	2	2	2	1	1	1	2	2	1	1	1	2	2	1	1	1
47	2	2	2	2	1	2	2	2	1	2	2	2	1	1	1	1	1	2	2	2	2	2	1	2	2	2	2	2	2	2	1	1	1	2	2	2	1	1
48	1	2	2	1	2	2	2	2	1	2	1	1	1	1	1	1	1	1	1	1	1	1	1	2	2	2	2	1	1	1	1	1	1	1	1	1	2	2
49	1	1	1	1	2	2	2	2	1	2	1	1	1	1	2	1	1	1	2	2	1	1	2	2	2	2	2	1	1	2	1	1	1	2	1	2	2	2
50	1	2	2	1	1	2	2	1	1	2	1	1	1	1	2	1	1	1	1	1	1	1	2	2	2	2	2	1	2	2	1	2	2	2	2	2	2	2
51	1	1	1	1	1	1	1	1	1	2	1	1	1	1	1	1	1	1	1	1	1	1	1	2	2	1	1	1	1	1	1	1	1	1	1	2	2	1
52	1	2	2	1	1	2	2	1	2	2	1	1	1	1	1	1	1	1	1	2	1	1	2	2	2	2	2	1	2	1	1	2	2	1	2	2	2	2
53	1	1	1	1	1	2	2	1	2	2	1	1	1	1	1	1	1	1	2	1	1	2	2	1	2	1	1	1	1	2	1	1	2	1	1	2	2	1
54	1	2	2	1	1	2	2	1	1	2	1	1	1	1	1	1	1	2	2	2	1	2	2	2	2	1	2	2	2	1	1	2	1	2	2	2	2	2
55	1	2	2	1	1	2	2	1	1	2	2	2	1	1	1	1	1	1	2	2	1	1	2	2	2	2	2	2	2	1	2	1	2	2	2	2	2	1
56	1	2	2	1	1	2	2	1	1	2	1	1	1	1	1	1	1	2	1	1	1	2	1	1	2	2	1	2	1	1	1	1	2	2	2	2	2	1
57	1	1	1	2	1	2	2	2	1	2	2	2	1	1	2	1	1	2	1	2	1	2	2	2	2	2	2	2	2	2	1	1	1	2	1	2	2	2
58	1	2	1	1	1	2	2	2	2	2	2	2	1	1	1	1	2	2	1	1	1	2	2	1	2	2	2	1	2	2	2	1	1	1	1	2	2	1
59	1	2	1	1	2	2	2	1	2	2	1	1	1	1	1	1	1	1	2	2	1	1	2	1	1	1	1	1	1	1	1	1	1	1	1	1	1	1
60	1	1	2	1	2	2	2	1	1	2	1	1	1	1	1	1	1	2	2	2	1	2	2	2	2	1	1	1	1	2	1	1	1	1	1	1	2	1
61	1	1	2	1	2	2	2	1	1	2	1	1	1	1	1	1	1	2	1	1	1	2	2	2	2	2	2	1	2	1	2	2	2	2	2	2	2	2
62	1	2	1	1	1	1	1	1	1	1	1	1	1	1	1	1	1	2	2	2	2	2	1	2	1	2	2	2	2	1	1	1	1	2	1	1	2	1
63	1	2	2	1	1	2	2	1	1	2	1	1	1	1	1	1	2	2	1	2	2	2	2	1	2	1	1	1	1	1	1	1	1	2	2	2	2	1
64	1	2	1	1	1	2	2	1	1	2	1	1	1	1	1	1	1	1	1	1	1	1	1	1	1	1	1	1	1	1	1	2	2	1	1	2	2	2
65	2	2	2	2	1	1	1	2	1	1	1	2	1	1	2	2	2	1	2	2	1	1	2	1	2	2	2	2	2	2	2	1	1	1	1	2	1	1
66	1	2	1	1	2	2	2	1	2	1	1	1	1	1	1	1	1	2	2	2	1	2	1	2	2	2	2	2	1	2	1	1	1	1	1	1	2	1
67	1	2	2	1	1	2	2	1	1	2	1	1	1	1	1	1	2	1	1	1	1	1	1	2	2	2	2	2	2	2	2	1	1	1	2	2	2	1
68	1	1	2	1	2	2	1	1	2	1	2	1	1	1	1	1	1	1	2	1	1	1	1	1	2	2	2	1	2	1	1	1	1	1	1	1	1	1
69	1	2	2	1	1	2	2	1	1	2	1	1	1	2	1	1	1	1	1	1	1	1	1	1	1	1	1	2	2	1	1	1	1	1	1	1	2	1
70	1	2	2	1	1	2	2	1	1	2	1	1	1	1	1	1	2	1	2	1	1	1	2	1	1	1	1	1	1	1	1	1	1	1	1	2	2	2
71	1	2	1	1	1	2	2	1	1	2	1	1	1	1	2	1	1	2	2	2	2	2	2	1	1	1	2	2	1	2	1	1	1	1	2	1	1	1
72	1	1	2	1	1	2	2	1	1	1	1	1	1	1	1	1	1	1	1	1	1	1	1	1	1	2	2	1	1	1	1	1	1	1	1	1	1	1
73	1	1	2	1	1	2	1	1	2	1	1	1	1	1	1	1	1	1	1	1	1	1	2	2	2	2	1	1	1	1	1	1	1	1	1	1	1	1
74	1	1	1	1	1	2	2	2	2	1	1	1	1	1	1	1	1	2	1	1	1	2	1	2	1	2	1	1	1	1	1	1	1	1	1	1	1	1
75	1	2	1	1	1	1	1	1	1	1	1	1	1	1	1	1	1	1	2	2	1	1	1	1	1	2	2	1	1	1	1	1	1	1	1	1	1	1
76	1	2	2	1	1	2	2	1	2	2	1	1	1	1	1	1	1	1	1	2	1	1	2	2	2	2	2	1	1	1	1	1	1	1	2	1	2	2
77	1	2	2	2	1	2	2	1	1	2	1	2	1	1	1	1	2	1	2	2	1	1	2	2	2	2	2	2	1	2	1	1	1	1	2	2	2	2
78	1	2	2	1	1	2	2	2	1	1	1	1	1	1	2	1	1	1	2	2	1	1	2	2	2	1	1	2	2	1	1	1	1	2	2	1	2	1
79	1	1	2	1	1	2	2	1	1	2	1	1	1	1	1	1	1	1	2	2	2	1	2	2	2	2	2	1	1	1	1	1	1	1	1	1	2	2
80	1	2	1	1	1	2	2	1	1	1	1	1	1	1	1	1	1	1	1	1	1	1	1	1	2	1	1	2	1	2	1	1	1	1	1	2	2	1
81	1	2	1	1	1	2	2	1	1	2	1	1	1	1	1	1	1	2	2	2	1	1	1	1	1	1	1	2	1	1	1	1	1	1	2	1	2	2
82	1	1	2	1	1	2	1	1	1	1	1	1	1	1	1	1	1	1	2	2	1	1	1	1	1	1	1	1	1	1	1	1	1	2	1	1	2	1
83	1	1	1	1	2	2	2	2	2	1	2	1	1	1	1	1	1	1	1	1	1	1	1	1	2	2	2	1	1	2	2	1	2	1	1	1	2	1
84	1	1	1	1	1	2	2	1	1	1	1	1	1	1	1	1	1	2	1	1	1	2	2	1	1	2	2	1	1	1	1	1	2	1	1	1	1	1
85	1	2	2	1	2	2	2	2	1	2	1	1	1	1	1	1	1	1	1	1	1	2	2	2	2	2	2	1	1	1	1	1	1	2	2	1	2	1
86	1	1	2	1	2	2	2	1	2	1	2	1	1	1	1	1	1	1	2	2	1	1	1	1	1	1	1	1	2	1	1	1	1	1	1	1	1	1
87	1	2	2	1	1	1	1	1	1	2	1	1	1	1	1	1	1	1	1	1	1	1	1	1	1	2	1	1	1	2	1	1	1	1	1	1	2	1
88	1	2	2	1	1	2	2	1	1	2	1	2	2	1	1	1	1	1	1	1	1	2	2	2	2	2	2	2	2	1	1	1	1	2	2	2	2	2
89	2	2	2	1	1	2	2	2	1	2	1	1	1	1	1	1	1	2	1	1	1	2	2	2	2	2	2	2	2	2	1	1	2	2	2	2	2	2
90	1	1	1	1	2	2	2	2	1	1	1	1	1	1	1	1	1	2	1	2	1	1	2	2	2	2	2	1	1	1	1	1	1	1	1	2	1	1
91	1	1	1	1	1	2	2	2	1	1	1	1	1	1	2	1	1	1	2	2	1	2	2	2	2	2	2	2	2	2	2	1	1	2	2	1	1	2
92	1	1	2	1	1	1	1	1	1	2	1	1	2	1	1	1	2	1	2	2	1	1	1	1	2	1	1	1	2	1	1	1	1	1	1	2	2	1
93	1	1	2	1	1	1	1	1	1	2	1	1	1	1	2	1	1	1	1	1	2	1	2	2	2	1	1	2	2	1	1	2	2	2	2	2	2	2
94	2	2	2	2	1	2	2	1	1	2	1	2	1	1	2	1	2	2	2	2	2	2	2	2	2	1	2	2	2	2	1	1	1	1	1	1	2	2
95	1	2	2	1	1	2	2	1	1	2	2	1	1	2	1	1	1	1	1	1	2	1	2	2	2	2	2	2	2	1	1	1	1	2	2	1	1	1
96	1	2	2	2	2	2	2	1	1	1	2	2	1	1	1	1	2	1	2	2	2	1	2	2	2	2	2	2	2	2	2	1	2	2	1	2	2	2
97	1	1	1	1	1	2	2	2	1	1	1	1	1	1	1	1	1	1	1	2	1	1	2	1	2	2	2	1	1	1	2	1	1	1	1	2	2	1
98	1	2	1	1	2	2	1	2	1	1	1	1	1	1	1	1	1	1	1	1	1	1	1	1	1	2	2	2	1	1	2	1	1	1	1	1	1	2
99	1	1	1	1	2	2	2	1	1	1	1	1	1	1	1	1	1	2	2	1	1	2	2	1	1	2	1	1	1	2	2	1	1	1	1	2	2	1
100	1	2	2	1	1	2	2	1	1	2	1	2	1	1	1	1	1	2	1	1	2	2	2	1	2	2	2	1	2	1	1	1	1	2	2	1	2	2
101	1	2	2	1	1	2	2	1	1	2	1	1	1	1	1	1	1	2	1	1	2	1	1	2	2	2	1	1	1	1	1	1	1	1	1	1	2	1
102	1	1	2	1	2	2	2	1	1	2	1	1	1	1	1	1	1	1	2	2	2	1	2	1	1	2	2	1	1	1	2	1	1	1	1	1	2	2
103	1	1	1	1	1	2	2	1	1	2	1	1	1	1	1	1	1	2	1	1	1	2	1	2	1	2	1	1	1	1	1	1	1	1	1	1	1	1
104	1	2	1	1	1	2	2	2	1	2	1	1	1	1	1	1	1	1	1	1	2	2	2	1	1	1	1	1	1	1	1	1	1	1	1	1	2	1
105	1	2	2	1	1	2	2	1	1	2	1	1	1	1	1	1	1	2	2	2	1	2	2	2	2	2	2	2	2	1	1	1	1	2	2	1	2	1
106	1	2	2	1	1	2	2	1	1	2	1	1	1	1	2	1	1	1	1	1	1	1	2	1	2	2	2	2	2	2	1	1	1	2	2	2	2	1
107	1	2	2	2	1	2	2	2	1	2	1	1	2	1	1	1	2	1	1	2	1	1	1	1	1	2	2	2	2	2	1	1	1	1	2	2	2	2
108	1	1	1	1	1	2	2	1	1	2	1	1	1	1	1	1	1	1	1	1	1	1	1	1	1	2	1	1	2	2	1	2	2	1	1	2	1	2
109	1	2	1	1	1	2	2	1	2	2	1	1	1	1	1	1	1	1	1	1	1	1	2	1	1	1	1	1	1	2	1	1	1	1	1	1	1	1
110	1	1	1	1	1	2	2	1	1	2	1	1	1	1	2	1	1	2	2	1	2	2	2	1	2	2	2	2	2	2	1	2	2	1	1	2	2	2
111	1	2	1	1	1	2	2	1	1	2	1	1	1	1	1	1	1	1	2	2	1	1	1	1	1	1	1	1	1	2	1	2	1	1	1	1	2	1
112	1	2	2	1	1	2	1	1	1	1	1	1	1	1	1	1	1	1	2	1	1	1	1	1	2	2	2	1	1	2	1	1	1	2	1	2	2	1
113	1	1	2	1	1	2	2	1	1	1	1	1	1	1	1	1	1	2	2	2	2	2	1	2	2	2	1	1	2	1	1	1	1	2	2	1	2	2
114	1	2	1	1	1	2	2	2	1	1	1	1	1	1	2	1	1	1	2	2	2	1	2	2	2	2	2	2	2	2	1	1	1	2	2	2	1	1
115	1	1	2	1	1	1	1	1	1	1	1	1	1	1	1	1	1	1	2	2	1	1	1	1	1	2	2	1	1	1	2	1	1	1	1	1	1	1
116	1	1	2	1	2	2	2	1	2	2	2	1	1	1	1	1	1	1	1	2	1	1	2	1	1	1	1	1	1	1	1	1	1	1	1	1	2	1
117	1	2	2	1	1	2	2	1	1	2	1	1	1	1	1	1	1	2	2	2	2	2	1	2	2	2	1	2	1	1	1	1	1	2	2	2	2	1
118	1	1	2	1	1	2	2	1	1	2	1	1	1	1	1	1	1	2	1	1	2	1	2	2	2	2	2	1	2	2	1	1	2	1	1	2	1	2
119	1	2	2	1	2	2	2	1	1	2	2	1	1	1	1	1	2	1	2	2	2	1	2	2	2	2	2	1	2	1	1	1	2	2	1	2	2	2
120	1	1	1	1	2	2	2	2	1	1	1	1	1	1	1	1	1	2	1	2	1	2	2	2	1	2	1	1	1	2	2	1	2	1	1	2	2	1
121	1	1	1	1	1	1	1	1	2	1	1	1	1	1	1	1	1	2	1	1	1	1	1	2	1	2	2	1	1	1	1	2	1	1	1	1	2	2
122	1	2	1	1	1	2	2	2	1	1	1	1	1	2	1	1	1	2	2	1	1	2	2	2	2	2	2	2	2	2	2	2	2	2	2	1	2	2
123	1	2	2	2	1	2	2	2	2	1	1	1	1	1	1	1	1	2	2	2	1	2	1	2	2	2	2	2	2	2	2	1	1	2	2	1	1	1
124	1	2	2	1	1	1	1	1	1	1	1	1	1	1	1	1	1	1	1	1	1	1	1	1	2	1	1	2	1	1	1	1	1	1	1	1	1	1
125	1	2	1	1	1	2	2	2	1	1	1	1	1	2	2	1	2	1	1	2	1	1	2	2	2	2	2	2	2	1	1	1	1	2	2	2	2	2
126	1	2	2	1	1	2	2	1	1	1	1	1	1	1	1	1	1	1	1	1	1	1	1	1	2	1	1	2	1	1	1	1	1	1	1	1	1	1
127	1	2	1	1	1	2	2	1	1	2	1	1	1	1	1	1	1	1	1	2	1	1	2	2	2	2	1	1	2	1	2	1	1	1	1	1	2	1
128	1	1	2	1	1	2	1	2	1	1	1	1	1	1	1	1	1	2	2	2	2	2	1	2	2	2	2	2	2	2	1	1	1	1	1	2	2	2
129	1	2	2	1	1	2	2	1	2	2	1	1	1	1	1	1	1	2	1	2	1	2	2	1	1	2	1	1	1	1	1	1	1	1	2	1	1	1
130	1	2	2	1	2	2	2	2	2	2	1	1	1	1	1	1	1	1	2	2	1	1	2	2	2	1	1	2	2	1	1	1	1	1	1	2	2	2
131	1	1	1	1	1	2	2	2	1	1	1	1	1	1	1	1	1	1	1	1	1	1	1	1	2	2	2	1	1	1	1	1	1	1	1	1	2	1
132	1	2	2	1	1	2	2	2	1	2	1	1	1	1	1	1	1	2	1	1	2	2	2	1	2	2	2	1	1	1	1	1	1	1	2	1	2	1
133	1	1	2	1	1	2	2	1	1	1	1	1	1	1	1	1	1	2	1	2	2	2	1	1	2	2	1	2	2	2	1	1	1	1	2	1	2	2
134	1	2	2	1	2	2	2	1	2	2	1	1	1	1	1	1	1	2	1	1	1	2	1	1	2	2	2	1	1	1	1	2	1	1	2	2	2	2
135	1	2	2	1	1	2	2	2	1	2	1	1	1	1	1	1	1	1	2	1	1	1	2	2	2	1	1	1	1	1	1	1	1	1	1	2	2	1
136	1	2	1	1	1	2	2	2	1	2	1	2	1	1	1	1	1	2	1	1	2	2	2	1	2	1	1	1	2	1	1	1	2	1	1	1	2	2
137	1	2	2	1	1	2	2	2	1	2	1	1	1	1	1	1	1	1	1	1	1	2	2	2	2	2	2	2	2	2	2	1	1	2	2	2	2	2
138	1	1	2	1	1	2	2	1	1	2	1	1	1	1	1	1	1	1	1	1	1	2	2	1	1	1	1	2	2	2	2	1	1	1	2	1	2	1
139	1	1	2	1	1	2	2	1	1	2	1	1	1	1	1	1	1	2	1	1	1	2	1	2	2	1	1	1	1	1	1	1	1	2	1	1	2	1
140	1	2	2	1	1	2	2	1	1	1	1	1	1	1	1	1	1	1	2	2	1	1	1	1	2	2	2	1	2	2	2	1	1	1	2	1	2	1
141	1	2	1	1	1	2	2	2	1	2	1	1	1	1	2	1	1	1	2	2	2	1	2	2	2	2	2	2	1	2	2	1	1	2	2	1	1	1
142	1	1	1	1	1	2	2	2	1	2	1	1	1	1	1	1	1	1	1	1	1	1	2	1	2	2	2	1	2	2	2	1	1	1	1	2	2	2
143	1	1	1	1	2	2	1	2	2	2	1	1	1	1	2	1	1	1	2	2	1	1	1	2	2	2	2	1	2	2	2	1	1	1	1	2	1	2
144	1	1	2	1	1	2	2	1	1	2	1	1	1	1	1	1	1	1	1	1	1	1	2	1	2	1	1	1	2	2	1	2	1	1	1	1	2	2
145	1	2	2	1	1	2	2	2	1	2	1	1	1	1	1	1	1	1	1	1	1	1	1	2	2	2	2	1	1	1	1	1	1	1	1	1	2	1
146	2	2	1	2	1	2	2	1	1	2	1	2	2	1	1	1	1	1	1	1	1	1	1	2	2	2	1	2	2	1	1	1	1	1	1	1	1	2
147	1	2	1	1	1	2	2	1	1	2	1	1	1	1	1	1	1	1	1	1	1	1	1	2	2	2	1	2	1	2	2	1	1	2	2	1	2	2
148	1	2	2	2	1	2	2	1	2	2	2	2	2	2	2	1	1	1	2	2	2	1	2	1	2	2	1	2	2	2	1	1	2	2	2	1	1	1
149	1	1	2	1	1	2	2	1	1	2	1	1	1	1	1	1	1	1	2	2	1	1	2	2	2	1	1	2	1	2	1	1	2	1	2	2	2	2
150	1	1	1	1	1	2	2	1	1	1	1	1	1	1	1	1	1	1	1	1	1	1	1	1	1	1	1	1	1	2	1	1	1	1	1	2	1	1
151	1	2	2	1	1	2	2	1	1	1	1	1	1	1	1	1	2	1	1	1	1	1	2	1	1	2	1	1	1	1	1	1	1	1	1	2	1	1
152	1	2	2	1	1	2	2	2	1	2	1	1	1	1	2	1	2	1	1	1	1	1	1	1	2	1	1	1	1	1	2	1	1	1	1	2	1	1
153	1	2	2	2	2	2	2	1	1	2	1	2	1	1	1	1	1	1	1	1	1	1	2	2	2	2	2	2	2	1	1	1	1	1	2	1	2	2
154	1	2	2	1	1	1	1	2	1	1	1	1	1	1	1	2	1	1	1	2	2	1	2	2	2	2	2	2	1	1	2	2	2	2	1	1	2	2
155	1	1	2	1	2	2	2	1	1	1	1	1	1	1	1	1	1	1	1	1	1	1	1	1	1	1	1	1	1	2	1	1	1	2	1	2	1	1
156	1	2	2	2	1	2	2	2	1	2	2	2	1	1	1	1	1	2	1	1	2	2	2	2	2	2	2	2	2	1	2	1	1	2	2	2	2	2
157	1	1	1	1	1	2	2	1	1	1	1	1	1	1	2	1	2	1	1	2	1	1	2	2	2	2	2	1	2	1	1	1	1	1	1	1	1	1
158	2	2	2	2	1	2	2	1	1	1	1	1	2	2	2	1	2	2	2	2	2	2	2	1	2	1	1	1	2	1	1	1	1	2	2	2	1	1
159	1	1	2	1	1	2	1	1	1	1	1	1	1	1	1	1	2	1	1	1	2	1	2	1	2	2	1	1	2	1	1	1	1	1	1	2	1	2
160	1	1	2	1	1	2	1	1	1	1	1	1	1	1	2	1	1	1	2	2	1	1	1	1	2	1	1	2	1	2	1	1	2	1	2	1	2	2
161	1	2	2	1	1	2	2	1	1	2	1	2	1	1	1	1	2	2	1	1	1	2	2	2	2	2	2	2	1	2	1	1	2	1	2	2	2	1
162	1	2	2	1	1	2	2	2	1	1	1	1	1	1	2	1	1	1	1	2	2	2	2	2	2	2	2	1	2	1	1	1	1	1	2	1	1	2
163	1	1	1	1	1	2	2	1	2	1	1	1	1	1	1	1	1	1	2	1	1	1	1	1	2	2	2	1	2	2	2	1	1	1	1	2	1	1
164	1	2	1	2	2	2	2	2	1	2	1	2	1	2	1	1	1	2	1	2	1	2	2	2	2	2	2	2	2	1	1	1	1	1	2	2	2	1
165	1	2	1	1	1	2	2	1	1	2	1	1	1	1	1	1	1	2	2	2	1	2	2	2	2	2	2	2	1	1	2	2	2	2	2	2	2	2
166	1	2	1	1	1	1	2	1	1	1	1	1	1	2	2	1	1	1	2	2	1	1	1	1	2	1	1	2	2	1	1	1	1	2	1	1	2	1
167	1	1	1	1	1	2	2	1	1	1	1	1	1	1	2	1	1	1	1	1	1	1	2	2	2	1	1	1	1	2	1	1	2	1	1	2	2	2
168	1	1	1	1	1	2	1	1	1	1	1	1	1	1	1	1	1	1	1	1	1	1	1	1	1	2	2	1	1	2	1	1	1	1	1	1	1	1
169	1	2	2	2	1	2	2	1	1	2	1	2	1	2	1	1	1	1	2	1	1	1	2	2	2	2	2	2	1	2	1	1	1	2	2	1	2	2
170	1	1	1	1	1	2	2	1	1	1	1	1	1	1	1	1	1	1	1	1	1	1	1	2	2	2	2	1	1	1	1	1	1	1	1	1	1	1
171	1	2	1	1	1	2	1	1	1	1	1	1	1	1	1	1	2	1	1	1	1	2	2	1	1	1	1	1	1	1	1	1	1	1	1	1	1	1
172	1	1	2	1	1	2	1	1	1	1	1	1	1	1	1	1	1	1	2	1	1	1	1	1	2	2	2	1	1	1	1	1	1	1	1	1	1	1
173	1	1	2	1	1	2	2	1	1	2	1	1	1	1	1	1	1	1	1	1	2	1	1	1	2	1	1	2	2	1	1	2	1	1	2	1	2	1
174	1	2	2	1	1	2	2	2	1	2	1	1	1	1	1	1	1	1	1	1	1	1	2	2	2	2	2	1	1	1	1	1	2	2	1	1	2	1
175	1	2	1	2	1	2	2	1	1	2	1	1	1	1	1	1	1	1	2	2	1	1	2	2	2	2	2	2	2	2	2	1	2	1	2	2	1	2
176	1	2	2	1	1	2	2	2	1	2	1	1	1	1	1	1	1	1	2	1	2	1	1	1	2	2	1	2	2	2	1	1	1	1	2	1	2	1
177	2	2	2	1	2	2	2	2	1	2	1	1	1	1	1	1	1	2	1	2	1	1	2	2	2	1	2	2	2	1	2	1	1	1	2	2	2	2
178	1	1	2	1	1	2	2	1	1	2	1	1	1	1	1	1	1	1	1	1	1	1	1	1	1	1	1	1	1	1	1	1	1	2	1	1	2	1
179	1	2	2	1	1	2	2	1	1	2	1	2	1	1	1	1	1	2	1	1	2	2	1	2	1	1	1	1	1	1	1	1	1	2	1	1	2	1
180	1	2	2	2	1	1	1	1	1	1	1	2	1	1	2	1	1	1	1	1	1	1	2	2	2	2	2	2	2	2	2	2	2	2	2	2	2	2
181	1	2	2	1	1	2	2	1	1	2	1	1	1	1	1	1	1	1	2	2	1	1	1	1	1	1	1	2	1	1	1	1	1	1	2	2	2	1
182	1	2	2	1	2	2	2	1	1	2	1	1	1	1	1	1	1	2	1	1	1	2	1	2	2	2	2	1	1	1	1	1	1	1	1	1	1	1
183	1	2	2	1	2	2	2	1	2	2	1	2	1	1	1	1	1	1	1	1	1	1	2	2	2	2	2	1	2	1	2	1	1	1	1	1	2	2
184	1	2	1	1	1	2	2	1	1	2	1	1	1	1	1	1	1	1	2	2	1	2	2	1	1	1	1	1	1	1	1	1	1	1	1	2	2	1
185	1	1	2	1	1	2	2	1	1	2	1	1	1	1	1	1	1	1	1	1	2	1	1	1	2	1	1	1	1	2	1	1	2	1	2	1	2	1
186	1	1	2	1	2	2	2	1	2	2	1	1	1	1	1	1	2	1	1	1	1	1	1	1	2	2	1	2	1	1	1	2	2	1	2	2	2	2
187	1	2	2	1	1	2	2	1	2	1	1	1	1	2	2	1	1	1	2	1	1	1	2	2	2	2	2	2	2	2	1	1	2	1	2	2	2	2
188	1	1	2	1	1	2	2	1	1	1	1	1	1	1	1	1	2	1	1	1	1	1	1	1	1	1	1	1	2	2	2	1	1	1	1	2	2	1
189	1	2	1	1	1	2	2	1	2	2	1	1	1	2	1	1	1	1	1	1	1	1	1	1	1	2	2	2	1	2	2	1	1	1	1	1	2	1
190	2	2	2	1	1	2	2	2	1	1	1	2	1	1	1	1	1	1	1	2	1	1	2	2	2	2	2	1	2	1	2	1	1	1	2	2	2	2
191	1	2	2	1	1	2	2	1	1	2	1	1	1	2	2	1	1	1	2	2	2	1	2	2	2	2	2	2	2	2	2	1	1	1	2	2	2	1
192	1	2	2	1	1	2	2	1	1	2	1	1	1	1	1	1	1	1	1	1	2	1	2	1	2	2	2	1	2	1	1	1	1	2	1	2	2	2
193	1	2	1	1	1	1	1	1	1	1	2	2	1	1	1	1	1	2	1	1	2	2	2	2	2	2	2	2	2	1	1	1	1	2	1	1	2	2
194	1	2	1	1	1	2	2	2	1	1	1	1	1	1	1	1	2	1	1	2	2	1	2	1	2	2	2	2	1	2	2	1	2	1	1	2	2	1
195	1	2	1	1	1	2	2	1	1	1	1	1	1	1	1	1	1	1	1	1	1	1	2	2	2	2	2	2	1	2	1	1	1	2	1	1	2	2
196	1	2	1	1	1	2	2	1	1	1	1	1	1	1	1	1	2	1	1	1	1	1	1	2	2	2	1	1	1	2	1	1	1	1	1	2	2	2
197	1	2	1	1	1	2	2	1	1	1	1	1	1	1	1	1	2	1	1	1	1	1	1	1	2	2	2	1	2	2	1	1	1	1	1	2	2	1
198	1	2	1	1	1	2	2	1	1	1	1	1	1	1	2	1	1	1	1	2	2	2	2	2	2	2	2	2	2	2	2	1	2	1	1	1	2	1
199	1	2	2	1	2	2	1	1	1	1	1	1	1	2	1	1	1	1	2	1	1	1	1	1	1	2	1	1	2	2	1	1	1	1	1	2	2	2
200	1	2	2	1	1	2	2	1	1	2	1	2	1	1	1	1	1	2	1	1	2	2	2	2	2	2	2	2	2	1	1	1	1	2	2	1	2	2
201	1	2	2	1	1	2	2	1	1	1	1	1	1	1	1	1	1	1	1	1	1	1	2	2	2	2	2	2	2	2	1	1	2	2	2	2	2	2
202	1	2	1	1	1	2	2	2	1	2	1	1	1	1	1	1	1	1	1	1	1	1	1	1	1	1	1	2	1	1	1	1	1	1	2	2	2	2
203	1	1	1	1	1	2	2	1	1	1	1	1	1	1	1	1	1	1	1	1	1	1	1	1	2	1	1	1	1	2	2	2	2	1	1	2	2	1
204	1	2	1	1	1	2	2	1	1	1	1	1	1	1	1	1	1	1	1	1	1	1	1	1	2	1	1	1	1	2	1	1	1	1	1	1	2	1
205	1	2	2	1	1	2	2	1	1	2	2	1	1	1	1	1	1	2	1	1	1	2	1	1	2	2	2	2	2	1	1	1	1	1	1	1	2	2
206	1	2	2	2	1	2	2	1	1	1	2	2	1	2	1	1	2	1	1	1	2	1	2	2	2	2	2	1	2	1	1	2	2	2	1	2	2	2
207	1	2	2	1	1	2	2	1	1	2	1	1	1	1	1	1	1	2	2	1	1	2	2	1	2	2	2	2	2	1	2	1	2	1	2	1	2	1
208	1	1	2	1	2	2	2	1	1	1	1	1	1	1	1	1	1	1	1	1	1	1	2	2	2	2	2	2	1	2	1	1	1	1	1	1	2	1
209	1	2	2	1	1	2	2	2	1	1	1	1	1	1	1	1	2	1	1	1	1	2	2	1	1	2	2	1	2	1	1	1	1	1	1	1	1	1
210	1	2	2	1	1	2	2	1	1	1	1	1	1	1	1	1	2	1	1	1	1	1	1	1	2	1	1	2	2	2	1	1	1	1	2	1	2	2
211	2	2	2	1	1	2	2	1	1	2	1	1	1	1	1	1	1	1	2	2	2	1	2	2	2	2	2	2	2	1	1	1	1	1	2	1	2	2
212	1	1	1	2	1	2	2	1	1	2	1	2	1	1	1	1	1	2	2	2	1	2	2	2	2	2	2	1	2	2	2	1	1	2	2	1	1	1
213	1	1	1	1	1	2	1	1	1	2	1	2	1	1	2	1	1	1	2	2	1	1	1	1	1	2	2	2	1	2	1	1	2	2	2	2	2	2
214	1	1	2	2	1	2	2	2	1	2	1	2	1	1	1	1	1	2	1	2	2	2	2	1	2	2	1	2	2	2	2	1	2	2	2	2	2	2
215	1	2	2	1	1	2	2	1	1	1	1	1	1	1	1	1	1	2	1	2	1	2	1	2	2	2	2	2	1	1	2	1	1	1	2	2	2	1
216	1	2	2	1	1	2	2	1	1	1	1	1	1	1	1	1	1	1	1	1	1	1	1	1	2	1	1	1	2	1	1	1	1	2	1	2	2	2
217	1	2	1	1	1	2	2	1	1	1	1	1	1	1	1	1	1	1	1	1	1	1	1	1	1	2	2	1	1	2	1	1	1	2	1	1	2	2
218	1	2	2	1	1	2	2	1	1	2	1	1	1	1	1	1	1	2	1	2	2	2	2	1	2	2	2	2	2	2	2	1	2	1	2	1	2	2
219	1	2	2	1	1	2	2	1	1	1	1	1	1	1	1	1	2	1	1	1	1	1	1	1	2	1	1	1	1	1	2	1	1	2	2	1	2	2
220	1	2	2	1	1	2	2	2	1	1	1	1	1	1	1	1	1	1	1	1	1	2	2	1	1	2	2	1	1	1	1	1	2	1	2	2	2	1
221	1	2	1	1	2	2	2	2	1	1	1	2	1	1	2	1	1	2	2	2	2	2	2	1	2	1	1	2	1	2	2	1	1	2	2	2	2	2
222	2	2	1	2	2	2	2	1	1	2	2	2	1	1	2	1	1	2	2	2	1	2	2	2	2	2	2	2	2	2	2	1	1	2	2	2	2	2
223	1	2	2	2	1	2	1	1	1	2	2	1	1	1	2	1	1	2	1	1	2	1	2	2	2	2	2	2	2	1	1	1	1	1	2	2	2	2
224	1	1	1	1	1	1	1	1	1	1	1	1	1	1	1	1	1	2	1	2	2	1	2	2	1	1	1	1	2	2	1	1	1	1	1	1	1	1
225	2	2	2	1	1	2	2	2	1	2	1	1	1	1	1	1	1	1	2	2	2	1	2	2	2	2	2	2	2	2	2	1	1	2	2	2	2	1
226	1	1	2	1	1	2	2	1	1	2	1	1	1	1	2	1	1	1	2	2	2	1	1	1	2	1	1	2	1	1	1	1	1	1	1	2	1	1
227	1	2	2	1	1	2	2	1	1	1	2	1	1	1	1	1	1	1	1	1	1	1	2	2	2	2	1	2	2	1	1	2	2	2	2	1	2	2
228	1	1	2	1	1	2	2	1	1	1	1	1	1	1	1	1	1	2	1	1	1	2	2	1	2	1	1	1	1	2	1	1	1	1	1	2	2	1
229	1	2	2	1	1	2	2	1	1	2	2	1	1	1	2	1	1	1	2	2	1	1	1	2	2	1	1	2	2	1	2	1	1	1	2	2	2	2
230	1	1	2	1	1	2	2	1	1	2	1	1	1	1	1	1	1	1	2	2	2	1	1	1	2	1	1	2	1	2	2	1	1	1	1	1	1	1
231	1	1	1	1	1	2	1	1	1	1	1	1	1	1	1	1	1	1	1	1	1	1	1	2	2	2	2	1	1	1	1	1	1	1	1	1	1	1
232	1	1	1	1	1	2	1	1	1	1	1	1	1	1	1	1	1	1	2	1	1	1	2	2	2	2	2	1	1	1	1	1	1	1	2	2	1	1
233	1	1	2	1	1	2	2	1	1	1	1	1	1	1	1	1	1	1	2	2	1	1	2	1	1	1	1	1	1	1	1	1	1	1	1	1	1	1
234	1	1	1	1	2	2	2	1	1	1	1	1	1	1	1	1	1	1	1	1	1	1	2	1	2	2	2	1	1	1	1	1	1	1	1	1	1	1
235	1	1	1	1	1	2	2	1	1	1	1	1	1	1	1	1	1	2	1	1	1	2	1	1	1	1	1	1	1	1	1	1	1	1	1	1	1	1
236	1	1	1	1	1	2	2	1	1	1	1	1	1	1	1	1	1	1	1	1	1	1	1	2	2	2	1	1	1	1	1	1	1	1	1	1	1	1
237	1	1	2	1	2	2	2	1	1	1	1	1	1	1	1	1	1	1	1	1	1	1	1	1	1	2	1	1	1	1	1	1	1	1	1	1	1	1
238	1	1	2	1	1	1	1	1	1	1	1	1	1	1	1	1	1	1	2	2	1	1	1	1	1	2	2	1	1	1	1	1	1	1	1	1	1	1
239	1	1	2	1	1	2	2	1	1	1	1	1	1	1	1	1	1	1	2	2	1	1	1	2	2	2	2	1	1	1	1	1	1	1	1	1	1	1
240	1	1	1	1	1	2	2	1	1	1	1	1	1	1	1	1	1	1	1	1	2	1	2	1	2	1	1	1	1	1	1	1	1	1	1	1	1	1
241	1	1	1	1	1	2	2	1	1	1	1	1	1	1	1	1	1	2	1	1	1	2	2	1	1	2	1	1	1	1	1	1	1	1	1	1	1	1
242	1	1	1	1	2	2	2	1	1	1	1	1	1	1	1	1	1	1	1	2	1	1	1	1	2	2	2	1	1	1	1	1	1	1	1	1	1	1
243	1	1	2	1	1	2	2	1	1	1	1	1	1	1	1	1	1	1	2	1	1	1	1	1	1	2	1	1	1	1	1	1	1	1	1	1	1	1
244	1	1	2	1	1	2	1	1	1	1	1	1	1	1	1	1	1	1	2	2	1	1	1	1	1	2	1	1	1	1	1	1	1	1	1	1	1	1
245	1	1	2	1	1	2	1	1	2	1	1	1	1	1	1	1	1	1	2	2	1	2	2	1	1	2	2	1	1	1	1	1	1	1	1	1	1	1
246	1	1	1	1	1	2	2	1	1	1	1	1	1	1	1	1	1	1	1	1	1	1	1	2	2	2	2	1	1	1	1	1	1	1	1	1	1	1
247	1	1	2	1	1	2	2	1	1	1	1	1	1	1	1	1	1	1	1	1	1	1	2	1	2	2	1	1	1	1	1	1	1	1	1	1	1	1
248	1	1	2	1	1	2	2	1	2	1	1	1	1	1	1	1	1	1	1	1	1	1	1	1	1	2	2	1	1	1	2	1	1	1	1	1	1	1
249	1	1	1	1	1	2	2	1	1	1	1	1	1	1	1	1	1	1	1	2	1	1	1	1	1	2	2	1	1	1	1	1	1	1	1	1	1	1
250	1	1	1	1	1	2	2	1	1	1	1	1	1	1	1	1	1	1	1	1	1	1	1	2	2	2	2	1	1	1	1	1	1	1	1	1	1	1
251	1	1	2	1	1	2	1	1	1	1	1	1	1	1	1	1	1	1	2	2	1	1	1	2	2	2	2	1	1	1	1	1	1	1	1	1	1	1
252	1	1	1	1	1	1	1	1	1	1	1	1	1	1	1	1	1	1	1	1	1	1	2	2	2	2	2	1	1	1	1	1	1	1	1	1	1	1
253	1	1	2	1	1	2	2	1	1	1	1	1	1	1	1	1	1	1	1	1	1	1	1	1	1	1	1	1	1	1	1	1	1	1	1	1	1	1
254	1	1	2	1	1	1	1	1	1	1	1	1	1	1	1	1	1	1	2	2	1	1	1	2	2	2	2	1	1	1	1	1	1	1	1	1	1	1
255	1	1	1	1	1	1	1	1	1	1	1	1	1	1	1	1	1	1	1	1	1	1	1	2	2	2	2	1	1	1	1	1	1	1	1	1	1	1
256	1	1	2	1	1	1	1	1	1	1	1	1	1	1	1	1	1	1	1	1	1	1	1	1	2	1	1	1	1	1	1	1	1	1	1	1	1	1
257	1	1	1	1	1	2	2	1	1	1	1	1	1	1	1	1	1	2	1	1	1	1	1	1	1	2	1	1	1	1	1	1	1	1	1	1	1	1
258	1	1	1	1	2	2	1	1	1	1	1	1	1	1	1	1	1	1	1	2	1	1	1	1	2	2	2	1	1	1	1	1	1	1	1	1	1	1
259	1	1	2	1	1	2	2	1	2	1	1	1	1	1	1	1	1	1	2	2	2	1	2	1	1	1	1	1	1	1	1	1	1	1	1	1	1	1
260	1	1	1	1	1	2	2	1	1	1	1	1	1	1	1	1	1	1	2	1	1	1	1	2	2	2	2	1	1	1	1	1	1	1	1	1	1	1
261	1	1	2	1	1	1	1	1	1	1	1	1	1	1	1	1	1	1	1	1	1	1	1	2	2	1	1	1	1	1	1	1	1	1	1	1	1	1
262	1	1	2	1	1	2	2	1	1	1	1	1	1	1	1	1	1	1	2	2	1	1	2	2	2	1	1	1	1	1	1	1	1	1	1	1	1	1
263	1	1	1	1	1	2	2	1	1	1	1	1	1	1	1	1	1	2	1	1	1	1	1	2	2	2	2	1	1	1	1	1	1	1	1	1	1	1
264	1	1	1	1	2	2	2	1	1	1	1	1	1	1	1	1	1	1	1	1	1	1	1	1	2	2	1	1	1	1	1	1	1	1	1	1	1	1
265	1	1	2	1	1	2	2	1	2	1	1	1	1	1	1	1	1	1	2	2	1	1	1	1	2	2	2	1	1	1	1	1	1	1	1	1	1	1
266	1	1	2	1	1	1	1	1	1	1	1	1	1	1	1	1	1	1	2	1	2	1	1	1	1	2	2	1	1	1	1	1	1	1	1	1	1	1
267	1	1	1	1	1	2	2	1	1	1	1	1	1	1	1	1	1	2	1	2	1	2	2	1	1	2	2	1	1	1	1	1	1	1	1	1	1	1
268	1	1	1	1	1	2	1	1	1	1	1	1	1	1	1	1	1	1	1	1	1	1	1	1	2	2	2	1	1	1	1	1	1	1	1	1	1	1
269	1	1	2	1	1	1	1	1	1	1	1	1	1	1	1	1	1	1	1	1	1	1	1	1	1	1	1	1	1	1	1	1	1	1	1	1	1	1
270	1	1	1	1	1	2	2	1	1	1	1	1	1	1	1	1	1	1	1	1	1	1	1	2	2	2	2	1	1	1	1	1	1	1	1	1	1	1
271	1	1	1	1	1	1	1	1	1	1	1	1	1	1	1	1	1	1	1	2	1	1	1	2	2	2	2	1	1	1	1	1	1	1	1	1	1	1
272	1	1	1	1	1	1	1	1	1	1	1	1	1	1	1	1	1	1	1	1	1	1	1	2	2	2	2	1	1	1	1	1	1	1	1	1	1	1
273	1	1	1	1	1	1	1	1	1	1	1	1	1	1	1	1	1	1	1	1	1	1	1	2	2	2	2	1	1	1	1	1	1	1	1	1	1	1
274	1	1	2	1	2	1	1	1	1	1	1	1	1	1	1	1	1	1	2	1	1	1	2	1	1	2	2	1	1	1	1	1	1	1	1	1	1	1
275	1	1	2	1	1	2	1	1	1	1	1	1	1	1	1	1	1	2	1	2	1	1	1	2	2	2	2	1	1	1	1	1	1	1	1	1	1	1
276	1	1	2	1	1	2	1	1	1	1	1	1	1	1	1	1	1	1	2	2	1	1	1	1	1	2	1	1	1	1	1	1	1	1	1	1	1	1
277	1	1	1	1	1	2	1	1	2	1	1	1	1	1	1	1	1	2	1	1	1	2	1	2	1	2	2	1	1	1	1	1	1	1	1	1	1	1
278	1	2	1	1	2	2	1	1	1	1	1	1	1	1	1	1	1	2	1	1	1	2	1	2	1	2	2	1	1	1	1	1	1	1	1	1	1	1
279	1	1	1	1	2	2	1	1	1	1	1	1	1	1	1	1	1	1	1	1	1	1	2	2	2	2	2	1	1	1	1	1	1	1	1	1	1	1
280	1	1	1	1	1	2	2	1	1	1	1	1	1	1	1	1	1	2	1	2	2	1	1	2	2	2	2	1	1	1	1	1	1	1	1	1	1	1
281	1	1	2	1	1	2	2	1	1	1	1	1	1	1	1	1	1	1	1	1	1	1	1	1	1	2	2	1	1	1	1	1	1	1	1	1	1	1
282	1	1	2	1	1	2	1	1	1	1	1	1	1	1	1	1	1	1	1	2	1	1	1	1	2	2	2	1	1	1	1	1	1	1	1	1	1	1
283	1	1	2	1	1	2	1	1	1	1	1	1	1	1	1	1	1	1	2	2	1	1	1	1	2	2	2	1	1	1	1	1	1	1	1	1	1	1
284	1	1	2	1	1	2	2	1	1	1	1	1	1	1	1	1	1	1	1	1	1	1	2	1	1	2	2	1	1	1	1	1	1	1	1	1	1	1
285	1	1	1	1	1	2	1	1	1	1	1	1	1	1	1	1	1	2	1	2	1	2	1	2	1	2	2	1	1	1	1	1	1	1	1	1	1	1
286	1	1	1	1	2	1	1	1	1	1	1	1	1	1	1	1	1	1	1	1	1	1	1	2	2	2	1	1	1	1	1	1	1	1	1	1	1	1
287	1	1	1	1	1	1	1	1	1	1	1	1	1	1	1	1	1	2	1	1	1	2	2	1	1	2	2	1	1	1	1	1	1	1	1	1	1	1
288	1	1	1	1	1	2	2	1	1	1	1	1	1	1	1	1	1	1	2	1	1	1	1	1	2	2	2	1	1	1	1	1	1	1	1	1	1	1
289	1	1	2	1	1	2	2	1	1	1	1	1	1	1	1	1	1	1	2	2	1	1	1	1	1	1	1	1	1	1	1	1	1	1	1	1	1	1
290	1	1	1	1	1	2	1	1	1	1	1	1	1	1	1	1	1	1	1	2	1	1	1	1	2	2	1	1	1	1	1	1	1	1	1	1	1	1
291	1	1	2	1	1	2	1	1	2	1	1	1	1	1	1	1	1	1	1	1	1	1	1	2	2	2	2	1	1	1	1	1	1	1	1	1	1	1
292	1	1	2	1	1	2	1	1	2	1	1	1	1	1	1	1	1	1	2	2	1	1	1	1	1	2	2	1	1	1	1	1	1	1	1	1	1	1
293	1	1	1	1	2	2	2	1	1	1	1	1	1	1	1	1	1	1	1	1	1	1	1	1	1	1	1	1	1	1	1	1	1	1	1	1	1	1
294	1	1	1	1	1	2	2	1	1	1	1	1	1	1	1	1	1	2	1	1	1	2	1	1	1	2	2	1	1	1	1	1	1	1	1	1	1	1
295	1	1	2	1	1	2	1	1	1	1	1	1	1	1	1	1	1	1	1	1	1	1	1	2	2	2	2	1	1	1	1	1	1	1	1	1	1	1
296	1	1	2	1	1	1	1	1	1	1	1	1	1	1	1	1	1	1	1	1	1	1	1	1	2	2	2	1	1	1	1	1	1	1	1	1	1	1
297	1	1	1	1	1	2	1	1	1	1	1	1	1	1	1	1	1	2	1	1	1	1	1	1	1	2	2	1	1	1	1	1	1	1	1	1	1	1
298	1	1	1	1	1	1	1	1	1	1	1	1	1	1	1	1	1	2	1	2	2	2	1	2	2	2	2	1	1	1	1	1	1	1	1	1	1	1
299	1	1	1	1	1	2	1	1	2	1	1	1	1	1	1	1	1	2	1	1	1	2	2	1	2	2	2	1	1	1	1	1	1	1	1	1	1	1
300	1	1	1	1	1	1	1	1	1	1	1	1	1	1	1	1	1	1	2	1	1	1	2	1	1	1	1	1	1	1	1	1	1	1	1	1	1	1
301	1	1	2	1	2	2	2	1	1	1	1	1	1	1	1	1	1	1	2	2	1	1	1	1	1	2	2	1	1	1	1	1	1	1	1	1	1	1
302	1	1	2	1	1	1	1	1	1	1	1	1	1	1	1	1	1	1	2	2	1	1	1	1	1	1	1	1	1	1	1	1	1	1	1	1	1	1
303	1	1	2	1	1	2	2	1	1	1	1	1	1	1	1	1	1	2	1	1	1	2	1	2	1	2	2	1	1	1	1	1	1	1	1	1	1	1
304	1	1	2	1	1	2	2	1	2	1	1	1	1	1	1	1	1	1	1	1	1	1	1	1	1	2	2	1	1	1	1	1	1	1	1	1	1	1
305	1	1	2	1	1	2	1	1	1	1	1	1	1	1	1	1	1	1	1	1	1	2	2	1	2	2	2	1	1	1	1	1	1	1	1	1	1	1
306	1	1	1	1	1	2	2	1	1	1	1	1	1	1	1	1	1	1	2	1	1	1	1	1	1	2	2	1	1	1	1	1	1	1	1	1	1	1
307	1	1	1	1	1	2	2	1	1	1	1	1	1	1	1	1	1	1	1	1	1	1	1	1	2	2	2	1	1	1	1	1	1	1	1	1	1	1
308	1	1	1	1	1	2	1	1	1	1	1	1	1	1	1	1	1	1	1	1	1	1	1	1	2	1	1	1	1	1	1	1	1	1	1	1	1	1
309	1	1	2	1	1	2	2	1	1	1	1	1	1	1	1	1	1	1	1	1	1	1	1	1	2	2	1	1	1	1	1	1	1	1	1	1	1	1
310	1	1	2	1	1	2	2	1	1	1	1	1	1	1	1	1	1	2	1	2	1	1	1	2	1	2	2	1	1	1	1	1	1	1	1	1	1	1
311	1	1	2	1	1	1	1	1	2	1	1	1	1	1	1	1	1	1	2	2	1	1	1	1	2	2	1	1	1	1	1	1	1	1	1	1	1	1
312	1	1	2	1	1	2	2	1	1	1	1	1	1	1	1	1	1	2	1	1	1	2	1	2	2	2	2	1	1	1	1	1	1	1	1	1	1	1
313	1	1	2	1	1	2	2	1	2	1	1	1	1	1	1	1	1	1	2	1	1	1	1	2	2	2	2	1	1	1	1	1	1	1	1	1	1	1
314	1	2	2	1	1	2	2	1	1	1	1	1	1	1	1	1	1	1	1	1	1	1	1	1	1	2	2	1	1	1	1	1	1	1	1	1	1	1
315	1	1	2	1	1	1	1	1	2	1	1	1	1	1	1	1	1	1	2	2	1	1	1	1	1	2	2	1	1	1	1	1	1	1	1	1	1	1
316	1	1	1	1	1	2	2	1	1	1	1	1	1	1	1	1	1	2	1	1	2	1	1	2	2	2	2	1	1	1	1	1	1	1	1	1	1	1
317	1	1	2	1	1	1	1	1	1	1	1	1	1	1	1	1	1	1	1	1	1	1	2	2	2	1	1	1	1	1	1	1	1	1	1	1	1	1
318	1	1	1	1	1	2	2	1	1	1	1	1	1	1	1	1	1	1	1	1	1	1	2	2	2	2	1	1	1	1	1	1	1	1	1	1	1	1
319	1	1	1	1	1	2	2	1	1	1	1	1	1	1	1	1	1	1	1	1	1	1	1	2	2	2	2	1	1	1	1	1	1	1	1	1	1	1
320	1	1	1	1	1	1	1	1	1	1	1	1	1	1	1	1	1	2	1	1	1	2	1	2	1	2	2	1	1	1	1	1	1	1	1	1	1	1
321	1	1	1	1	1	2	2	1	1	1	1	1	1	1	1	1	1	1	1	1	1	1	1	1	2	2	2	1	1	1	1	1	1	1	1	1	1	1
322	1	1	2	1	1	2	1	1	1	1	1	1	1	1	1	1	1	1	1	1	1	1	1	1	2	2	2	1	1	1	1	1	1	1	1	1	1	1
323	1	1	2	1	1	2	2	1	2	1	1	1	1	1	1	1	1	1	1	1	1	1	2	2	2	2	2	1	1	1	1	1	1	1	1	1	1	1
324	1	1	2	1	1	2	1	1	1	1	1	1	1	1	1	1	1	1	2	1	1	1	1	1	2	2	2	1	1	1	1	1	1	1	1	1	1	1
325	1	1	2	1	1	1	1	1	1	1	1	1	1	1	1	1	1	2	2	2	1	2	2	1	1	2	2	1	1	1	1	1	1	1	1	1	1	1
326	1	1	1	1	1	2	1	1	1	1	1	1	1	1	1	1	1	1	1	1	1	1	1	2	2	2	2	1	1	1	1	1	1	1	1	1	1	1
327	1	1	1	1	1	2	2	1	1	1	1	1	1	1	1	1	1	2	1	1	1	1	1	2	2	2	2	1	1	1	1	1	1	1	1	1	1	1
328	1	1	1	1	1	2	2	1	1	1	1	1	1	1	1	1	1	1	1	1	1	1	2	2	2	2	2	1	1	1	1	1	1	1	1	1	1	1
329	1	1	1	1	1	2	1	1	1	1	1	1	1	1	1	1	1	1	1	1	1	1	1	2	2	2	2	1	1	1	1	1	1	1	1	1	1	1
330	1	1	1	1	1	2	2	1	1	1	1	1	1	1	1	1	1	1	1	1	1	1	2	2	2	2	2	1	1	1	1	1	1	1	1	1	1	1
331	1	1	1	1	1	2	2	1	1	1	1	1	1	1	1	1	1	1	1	2	1	1	1	2	2	2	2	1	1	1	1	1	1	1	1	1	1	1
332	1	1	2	1	2	1	1	1	1	1	1	1	1	1	1	1	1	1	2	2	1	1	1	1	2	2	2	1	1	1	1	1	1	1	1	1	1	1
333	1	1	2	1	1	2	1	1	1	1	1	1	1	1	1	1	1	1	1	1	1	1	1	1	2	1	1	1	1	1	1	1	1	1	1	1	1	1
334	1	1	1	1	1	2	1	1	1	1	1	1	1	1	1	1	1	1	1	1	1	1	1	1	1	1	1	1	1	1	1	1	1	1	1	1	1	1
335	1	1	2	1	1	1	1	1	1	1	1	1	1	1	1	1	1	1	2	2	1	1	1	1	1	1	1	1	1	1	1	1	1	1	1	1	1	1
336	1	1	2	1	1	2	1	1	1	1	1	1	1	1	1	1	1	1	2	2	1	1	1	1	1	1	1	1	1	1	1	1	1	1	1	1	1	1
337	1	1	2	1	1	2	2	1	1	1	1	1	1	1	1	1	1	1	1	1	1	1	1	1	1	2	2	1	1	1	1	1	1	1	1	1	1	1
338	1	1	1	1	2	2	2	1	1	1	1	1	1	1	1	1	1	2	1	1	1	1	1	2	2	2	2	1	1	1	1	1	1	1	1	1	1	1
339	1	1	2	1	1	2	2	1	1	1	1	1	1	1	1	1	1	1	1	1	1	1	2	2	2	2	1	1	1	1	1	1	1	1	1	1	1	1
340	1	1	1	1	1	2	2	1	1	1	1	1	1	1	1	1	1	1	1	1	1	2	2	1	1	1	1	1	1	1	1	1	1	1	1	1	1	1
341	1	1	1	1	1	2	1	1	2	1	1	1	1	1	1	1	1	1	1	1	1	2	2	1	1	1	1	1	1	1	1	1	1	1	1	1	1	1
342	1	1	1	1	1	2	2	1	1	1	1	1	1	1	1	1	1	2	1	1	2	2	1	1	1	1	2	1	1	1	1	1	1	1	1	1	1	1
343	1	1	2	1	1	2	2	1	1	1	1	1	1	1	1	1	1	1	2	2	1	1	2	1	1	2	2	1	1	1	1	1	1	1	1	1	1	1
344	1	1	2	1	1	2	2	1	1	1	1	1	1	1	1	1	1	1	1	1	1	1	2	2	2	2	2	1	1	1	1	1	1	1	1	1	1	1
345	1	1	2	1	1	1	1	1	1	1	1	1	1	1	1	1	1	1	2	2	1	1	1	1	2	1	1	1	1	1	1	1	1	1	1	1	1	1
346	1	1	2	1	1	2	1	1	1	1	1	1	1	1	1	1	1	1	1	2	1	2	2	2	2	1	1	1	1	1	1	1	1	1	1	1	1	1
347	1	1	1	1	1	2	1	1	1	1	1	1	1	1	1	1	1	2	1	1	1	2	1	1	1	1	1	1	1	1	1	1	1	1	1	1	1	1
348	1	1	2	1	2	2	2	1	1	1	1	1	1	1	1	1	1	1	1	1	1	1	1	1	1	2	2	1	1	1	1	1	1	1	1	1	1	1
349	1	1	2	1	1	2	2	1	1	1	1	1	1	1	1	1	1	1	2	2	1	1	1	1	1	1	1	1	1	1	1	1	1	1	1	1	1	1
350	1	1	2	1	1	2	1	1	1	1	1	1	1	1	1	1	1	1	2	2	1	1	2	1	1	2	2	1	1	1	1	1	1	1	1	1	1	1
351	1	1	1	1	1	2	2	1	1	1	1	1	1	1	1	1	1	2	1	1	1	2	2	1	1	1	1	1	1	1	1	1	1	1	1	1	1	1
352	1	1	2	1	1	2	2	1	1	1	1	1	1	1	1	1	1	1	2	2	1	1	2	1	1	2	2	1	1	1	1	1	1	1	1	1	1	1
353	1	1	1	1	1	2	1	1	1	1	1	1	1	1	1	1	1	2	1	1	2	2	1	2	1	2	2	1	1	1	1	1	1	1	1	1	1	1
354	1	1	2	1	1	2	2	1	1	1	1	1	1	1	1	1	1	1	2	1	1	2	2	1	2	1	1	1	1	1	1	1	1	1	1	1	1	1
355	1	1	1	1	2	2	1	1	1	1	1	1	1	1	1	1	1	1	2	1	1	1	1	1	1	1	1	1	1	1	1	1	1	1	1	1	1	1
356	1	1	1	1	1	2	1	1	1	1	1	1	1	1	1	1	1	1	1	1	2	1	1	1	2	2	2	1	1	1	1	1	1	1	1	1	1	1
357	1	1	1	1	1	2	1	1	1	1	1	1	1	1	1	1	1	1	1	1	1	1	1	2	2	2	2	1	1	1	1	1	1	1	1	1	1	1
358	1	1	1	1	1	2	1	1	2	1	1	1	1	1	1	1	1	1	2	2	1	1	1	1	1	2	2	1	1	1	1	1	1	1	1	1	1	1
359	1	1	2	1	1	2	2	1	1	1	1	1	1	1	1	1	1	1	2	1	1	1	1	2	2	2	1	1	1	1	1	1	1	1	1	1	1	1
360	1	1	2	1	1	2	2	1	1	1	1	1	1	1	1	1	1	1	1	2	2	2	2	1	1	2	1	1	1	1	1	1	1	1	1	1	1	1
361	1	1	2	1	1	2	2	1	1	1	1	1	1	1	1	1	1	1	2	2	1	1	1	1	2	2	2	1	1	1	1	1	1	1	1	1	1	1
362	1	1	2	1	1	1	1	1	1	1	1	1	1	1	1	1	1	1	1	1	1	1	2	1	1	1	1	1	1	1	1	1	1	1	1	1	1	1
363	1	1	2	1	1	2	2	1	1	1	1	1	1	1	1	1	1	1	2	1	1	1	1	1	1	1	2	1	1	1	1	1	1	1	1	1	1	1
364	1	1	1	1	1	2	2	1	1	1	1	1	1	1	1	1	1	1	1	1	1	1	1	2	2	2	2	1	1	1	1	1	1	1	1	1	1	1
365	1	1	2	1	1	1	1	1	1	1	1	1	1	1	1	1	1	1	1	1	1	1	2	1	1	1	1	1	1	1	1	1	1	1	1	1	1	1
366	1	1	2	1	1	1	1	1	1	1	1	1	1	1	1	1	1	1	1	2	1	1	2	2	2	1	1	1	1	1	1	1	1	1	1	1	1	1
367	1	1	2	1	1	2	2	1	1	1	1	1	1	1	1	1	1	2	1	2	1	2	1	2	2	2	2	1	1	1	1	1	1	1	1	1	1	1
368	1	1	2	1	1	1	1	1	1	1	1	1	1	1	1	1	1	1	2	2	1	1	2	1	1	2	2	1	1	1	1	1	1	1	1	1	1	1
369	1	1	2	1	1	2	2	1	1	1	1	1	1	1	1	1	1	2	1	2	1	2	1	2	2	2	2	1	1	1	1	1	1	1	1	1	1	1
370	1	1	1	1	1	1	1	1	1	1	1	1	1	1	1	1	1	1	1	1	1	2	2	1	1	1	2	1	1	1	1	1	1	1	1	1	1	1
371	1	1	2	1	1	2	1	1	1	1	1	1	1	1	1	1	1	1	2	2	1	1	1	2	2	2	2	1	1	1	1	1	1	1	1	1	1	1
372	1	1	2	1	2	2	1	1	1	1	1	1	1	1	1	1	1	2	1	1	1	2	1	1	2	1	1	1	1	1	1	1	1	1	1	1	1	1
373	1	1	1	1	1	1	1	1	1	1	1	1	1	1	1	1	1	1	1	1	1	1	1	1	2	2	2	1	1	1	1	1	1	1	1	1	1	1
374	1	1	2	1	1	2	1	1	2	1	1	1	1	1	1	1	1	1	2	2	1	1	1	1	1	1	1	1	1	1	1	1	1	1	1	1	1	1
375	1	1	1	1	1	1	1	1	1	1	1	1	1	1	1	1	1	1	1	1	1	2	2	1	1	1	1	1	1	1	1	1	1	1	1	1	1	1
376	1	1	2	1	1	1	1	1	1	1	1	1	1	1	1	1	1	1	1	1	1	1	1	2	2	2	2	1	1	1	1	1	1	1	1	1	1	1
377	1	1	2	1	1	1	1	1	1	1	1	1	1	1	1	1	1	1	2	2	1	1	1	1	1	1	1	1	1	1	1	1	1	1	1	1	1	1
378	1	1	1	1	2	2	1	1	1	1	1	1	1	1	1	1	1	2	1	2	1	2	1	2	2	2	2	1	1	1	1	1	1	1	1	1	1	1
379	1	1	2	1	1	2	2	1	1	1	1	1	1	1	1	1	1	1	2	2	1	1	1	1	1	1	1	1	1	1	1	1	1	1	1	1	1	1
380	1	1	2	1	1	1	1	1	1	1	1	1	1	1	1	1	1	1	2	1	1	2	2	1	1	2	1	1	1	1	1	1	1	1	1	1	1	1
381	1	1	2	1	1	2	2	1	1	1	1	1	1	1	1	1	1	1	2	2	1	1	1	1	1	2	2	1	1	1	1	1	1	1	1	1	1	1
382	1	1	2	1	1	1	1	1	1	1	1	1	1	1	1	1	1	1	1	1	1	1	1	1	2	2	2	1	1	1	1	1	1	1	1	1	1	1
383	1	1	1	1	1	2	2	1	1	1	1	1	1	1	1	1	1	2	1	1	1	2	2	1	1	2	2	1	1	1	1	1	1	1	1	1	1	1
384	1	1	1	1	1	1	1	1	1	1	1	1	1	1	1	1	1	1	1	1	1	1	2	2	2	2	2	1	1	1	1	1	1	1	1	1	1	1
385	1	1	2	1	1	2	2	1	1	1	1	1	1	1	1	1	1	1	1	1	1	1	1	2	2	2	2	1	1	1	1	1	1	1	1	1	1	1
386	1	1	1	1	1	2	1	1	1	1	1	1	1	1	1	1	1	1	1	1	1	1	1	2	2	2	2	1	1	1	1	1	1	1	1	1	1	1
387	1	1	1	1	1	2	1	1	1	1	1	1	1	1	1	1	1	1	1	1	1	1	2	1	1	2	1	1	1	1	1	1	1	1	1	1	1	1
388	1	1	2	1	1	2	2	1	1	2	1	1	1	1	1	1	1	2	1	2	1	1	2	2	2	2	1	2	1	2	2	1	1	2	1	2	2	1
389	1	1	2	1	2	1	1	1	1	1	1	1	1	1	1	1	1	1	1	1	1	1	1	1	2	2	2	1	1	1	1	1	1	1	1	1	1	1
390	1	1	2	1	2	2	1	1	1	1	1	1	1	1	1	1	1	2	2	2	1	2	2	1	2	1	1	1	1	1	1	1	1	1	1	1	1	1
391	1	1	1	1	1	2	1	1	1	1	1	1	1	1	1	1	1	1	1	2	1	1	1	1	1	2	2	1	1	2	1	1	1	1	1	1	1	1
392	1	1	1	1	1	2	2	1	1	1	1	1	1	1	1	1	1	2	1	1	1	2	1	2	1	2	1	1	1	1	1	1	1	1	1	1	1	1
393	1	1	2	1	1	2	1	1	2	1	1	1	1	1	1	1	1	1	2	2	1	1	1	2	2	1	1	1	1	1	1	1	1	1	1	1	1	1
394	1	1	2	1	1	2	1	1	1	1	1	1	1	1	1	1	1	2	1	1	1	2	2	1	1	1	2	1	1	1	1	1	1	1	1	1	1	1
395	1	1	2	1	1	1	1	1	1	1	1	1	1	1	1	1	1	1	1	1	1	1	1	1	1	1	1	1	1	1	1	1	1	1	1	1	1	1
396	1	1	2	1	1	2	2	1	2	1	1	1	1	1	1	1	1	1	1	1	1	1	2	1	1	1	1	1	1	1	1	1	1	1	1	1	1	1
397	1	1	2	1	1	2	2	1	1	1	1	1	1	1	1	1	1	1	1	1	1	1	1	1	1	1	1	1	1	1	1	1	1	1	1	1	1	1
398	1	1	2	1	1	2	2	1	1	1	1	1	1	1	1	1	1	1	1	1	1	1	2	1	1	1	1	1	1	1	1	1	1	1	1	1	1	1
399	1	1	1	1	1	1	1	1	1	1	1	1	1	1	1	1	1	2	1	1	1	1	1	2	1	2	1	1	1	1	1	1	1	1	1	1	1	1
400	1	1	2	1	1	1	1	1	1	1	1	1	1	1	1	1	1	2	1	1	2	2	2	1	2	1	1	1	1	1	1	1	1	1	1	1	1	1
401	1	1	1	1	1	2	2	1	1	1	1	1	1	1	1	1	1	1	1	1	1	1	2	1	1	1	1	1	1	2	1	1	1	1	1	2	2	1
402	1	1	2	1	1	2	2	1	2	1	1	1	1	1	1	1	1	1	1	1	1	2	2	1	1	1	1	1	1	1	1	1	1	1	1	1	1	1
403	1	1	2	1	1	2	2	1	2	2	1	1	1	1	1	1	1	1	1	2	1	1	2	2	2	2	2	1	1	1	1	1	1	2	1	1	2	1
404	1	1	1	1	1	2	2	1	1	1	1	1	1	1	1	1	1	2	1	1	1	2	2	1	1	1	2	1	1	1	1	1	1	1	1	1	1	1
405	1	1	1	1	1	2	1	1	1	1	1	1	1	1	1	1	1	1	1	1	1	2	2	1	1	1	1	1	1	1	1	1	1	1	1	1	1	1
406	1	1	2	1	1	2	2	1	1	1	1	1	1	1	1	1	1	1	1	1	2	1	1	1	1	1	1	1	1	1	1	1	1	1	1	1	1	1
407	1	1	1	1	1	2	2	1	1	1	1	1	1	1	1	1	1	2	1	1	1	2	2	1	2	2	1	1	1	1	1	1	1	1	1	1	1	1
408	1	1	1	1	1	1	1	1	2	1	1	1	1	1	1	1	1	2	1	1	2	2	1	2	1	1	1	1	1	1	1	1	1	1	1	1	1	1
409	1	1	1	1	2	2	2	1	1	1	1	1	1	1	1	1	1	1	1	1	2	1	1	1	1	2	1	1	1	2	1	1	1	1	1	2	2	1
410	1	1	1	1	2	2	2	1	1	1	1	1	1	1	1	1	1	1	1	1	1	1	1	1	1	2	1	1	1	1	1	1	2	1	1	1	2	1
411	1	1	1	1	2	2	2	1	1	1	1	1	1	1	1	1	1	1	1	1	1	1	2	2	2	2	2	1	1	1	1	1	1	1	1	1	1	1
412	1	1	1	1	2	1	1	1	1	1	1	1	1	1	1	1	1	1	1	1	1	1	2	1	1	2	2	1	1	1	1	1	1	1	1	1	1	1
413	1	1	1	1	1	2	2	1	1	2	1	1	1	1	1	1	1	1	2	1	1	1	1	2	2	2	2	1	1	1	1	1	1	1	1	1	1	1
414	1	1	1	1	2	2	2	1	1	1	1	1	1	1	1	1	1	1	1	1	1	1	1	2	2	2	1	1	1	1	1	1	1	1	1	1	1	1
415	1	1	2	2	1	2	2	1	1	2	1	2	1	1	1	1	2	1	2	2	1	1	2	2	2	1	1	2	2	2	2	1	2	2	2	2	2	2
416	1	1	1	1	2	2	2	1	1	1	1	1	1	1	1	1	1	2	1	1	2	1	1	1	1	2	1	1	1	1	1	1	1	1	1	1	1	1
417	1	1	1	1	1	2	2	1	1	1	1	1	1	1	1	1	1	1	1	1	1	2	2	1	1	2	1	1	1	1	1	1	1	1	1	1	1	1
418	1	1	2	1	2	2	2	1	1	1	1	1	1	1	1	1	1	2	2	1	1	1	1	2	2	2	2	1	1	1	1	1	1	1	1	1	1	1
419	1	1	2	1	1	2	1	1	1	1	1	1	1	1	1	1	2	1	1	1	1	1	1	1	1	1	1	1	1	2	1	1	2	1	1	1	1	1
420	1	1	1	1	2	2	2	1	1	1	1	1	1	1	1	1	1	2	1	1	1	2	2	1	1	2	2	1	1	1	1	1	1	1	1	2	2	1
421	1	1	2	1	2	2	2	1	1	1	1	1	1	1	1	1	2	1	1	1	1	1	1	2	2	2	1	1	1	1	1	1	1	1	1	1	1	1
422	1	1	2	1	1	1	1	1	1	1	1	1	1	1	1	1	1	1	1	2	1	1	1	1	1	1	1	1	1	1	1	1	1	1	1	1	1	1
423	1	1	2	1	1	1	1	1	1	1	1	1	1	1	1	1	1	1	1	1	2	1	2	1	1	2	2	1	1	1	1	1	1	1	1	1	1	1
424	1	2	1	1	1	2	2	1	1	1	1	1	1	1	1	1	1	2	1	2	2	2	2	1	1	2	1	1	1	2	1	1	1	1	2	2	2	1
425	1	1	2	1	1	1	1	1	1	1	1	1	1	1	1	1	1	1	1	1	1	2	2	2	2	2	2	1	1	1	1	1	1	1	1	1	1	1
426	1	1	2	1	2	1	1	1	1	1	1	1	1	1	1	1	1	1	2	2	1	2	2	1	2	1	1	1	1	1	1	1	1	1	1	1	1	1
427	1	2	1	1	1	2	1	1	1	1	1	1	1	1	1	1	1	2	1	1	1	2	1	1	1	2	2	1	1	1	1	1	1	1	1	1	1	1
428	1	2	1	1	1	1	1	1	1	1	1	1	1	1	1	1	1	2	2	2	1	2	2	1	1	2	1	1	1	1	1	1	1	1	1	1	1	1
429	1	2	2	1	2	1	1	1	1	1	1	1	1	1	1	1	1	2	2	2	1	1	1	2	2	1	2	1	1	1	1	1	1	1	1	1	1	1
430	1	1	2	1	1	2	2	1	1	1	1	1	1	1	1	1	1	2	1	1	1	2	1	1	1	2	2	1	1	1	2	2	2	1	1	2	2	2
431	1	1	1	1	2	1	1	1	1	1	1	1	1	1	1	1	1	2	1	1	1	1	1	1	1	1	1	1	1	1	1	1	1	1	1	1	1	1
432	1	2	2	2	1	2	2	1	1	2	1	2	1	1	2	1	1	1	2	2	1	1	2	2	2	2	2	2	2	2	2	1	1	1	2	2	2	1
433	1	1	1	1	2	2	2	1	1	1	1	1	1	1	1	1	1	1	2	2	1	2	2	1	2	2	1	1	1	1	1	1	1	1	1	1	1	1
434	1	1	2	1	1	2	1	1	1	1	1	1	1	1	1	1	1	1	1	2	1	1	1	1	1	2	1	1	1	1	1	1	1	1	1	1	1	1
435	1	2	2	1	1	2	1	1	1	1	1	1	1	1	1	1	1	1	2	1	1	1	1	1	2	1	1	1	1	2	2	1	2	2	1	1	2	1
436	1	1	1	1	2	2	2	1	1	1	1	1	1	1	1	1	1	2	1	2	1	2	2	1	1	1	1	1	1	1	1	1	1	1	1	1	1	1
437	1	1	2	1	1	2	2	1	1	1	1	1	1	1	1	1	1	1	1	1	1	1	1	2	2	2	2	1	1	1	1	1	1	1	1	1	1	1
438	1	1	2	1	1	2	2	1	1	1	1	1	1	1	1	1	1	2	1	2	2	1	1	2	1	2	1	1	1	1	1	1	1	2	2	2	2	1
439	1	1	2	1	2	2	1	1	1	1	1	1	1	1	1	1	1	2	2	2	2	2	2	2	1	2	1	1	1	1	1	2	1	1	1	1	2	1
440	1	2	2	1	1	2	2	2	1	2	1	1	1	1	1	1	1	1	1	1	1	1	1	2	2	2	2	1	1	2	1	1	1	2	2	2	1	2
441	1	1	2	1	1	2	2	1	1	1	1	1	1	1	1	1	1	1	1	1	1	1	1	2	2	1	1	1	1	1	1	1	1	1	1	1	1	1
442	1	1	1	1	2	2	2	1	2	1	1	1	1	1	1	1	1	1	1	1	2	1	1	1	1	1	1	1	1	2	1	1	2	1	1	1	1	1
443	1	2	2	1	1	2	2	1	1	1	1	1	1	1	1	1	2	2	1	1	1	2	1	2	2	2	2	1	1	2	2	1	1	1	1	1	2	1
444	1	2	2	1	1	2	1	1	1	1	1	1	1	2	1	1	1	1	1	1	1	1	1	2	2	2	1	1	1	2	1	1	2	1	1	1	2	1
445	1	2	1	1	1	1	1	1	1	1	1	1	1	2	1	1	2	2	1	2	2	2	1	1	2	1	1	1	1	2	1	1	2	1	1	1	2	1
446	1	2	1	1	1	2	2	1	1	1	1	1	1	1	1	1	1	1	2	2	1	1	1	1	1	2	2	1	1	1	1	1	1	1	1	1	1	1
447	1	1	2	1	1	2	1	2	1	1	1	1	1	1	2	1	2	2	1	1	1	2	1	1	2	2	2	2	2	2	2	1	2	1	1	1	2	1
448	1	1	1	1	2	2	2	1	1	1	1	1	1	1	1	1	1	1	2	2	2	1	1	2	2	2	2	1	1	1	1	1	1	1	1	1	1	1
449	1	2	2	1	1	2	2	1	1	1	1	1	1	1	1	1	1	2	2	2	1	2	2	1	2	2	1	1	1	2	2	1	1	1	1	1	1	1
450	1	1	2	1	1	2	2	1	1	1	1	1	1	1	1	1	1	1	1	1	1	1	2	2	2	2	2	1	1	1	1	1	1	1	1	1	1	1
451	1	1	1	1	1	1	1	1	1	1	1	1	1	1	1	1	1	2	1	1	1	2	2	1	1	2	2	1	1	2	1	1	1	1	1	1	1	1
452	1	2	2	1	1	2	2	1	1	1	1	1	1	1	1	1	1	1	1	1	1	1	1	2	2	2	1	1	1	1	1	1	1	1	1	1	1	1
453	1	2	1	1	1	2	2	1	1	1	1	1	1	1	1	1	1	1	1	2	1	1	1	2	2	1	1	1	1	1	2	1	1	2	1	2	2	2
454	1	1	1	1	2	2	2	1	1	1	1	1	1	1	1	1	1	2	1	1	1	2	1	1	1	1	1	1	1	1	1	1	1	1	1	1	1	1
455	1	2	2	1	1	2	2	1	1	1	1	1	1	1	1	1	2	1	1	1	2	1	2	1	1	1	1	1	1	1	1	1	1	1	1	1	1	1
456	1	1	1	1	2	2	2	1	1	1	1	1	1	1	1	1	1	2	2	2	1	2	2	2	2	2	2	1	1	2	2	1	2	1	1	1	2	1
457	1	1	2	1	2	2	1	1	1	1	1	1	1	1	1	1	1	1	1	1	1	1	1	1	2	2	2	1	1	1	1	1	1	1	1	1	1	1
458	1	2	2	1	1	2	2	1	1	1	1	1	1	1	1	1	2	1	1	1	1	1	1	1	1	2	2	1	1	1	1	1	1	1	1	2	2	1
459	1	1	2	1	1	2	2	2	2	2	1	1	1	1	1	1	2	2	2	2	1	2	2	1	2	2	2	2	2	2	2	1	2	2	2	2	1	1
460	1	1	1	1	1	2	1	1	2	1	1	1	1	1	1	1	1	1	1	1	1	1	2	2	2	2	1	1	1	1	1	1	1	1	1	1	1	1
461	1	1	2	1	1	2	1	1	1	1	1	1	1	1	1	1	1	1	1	1	1	2	2	1	2	2	2	1	1	1	1	1	1	1	1	1	1	1
462	1	2	2	1	1	2	1	1	1	1	1	1	1	1	1	1	2	2	2	2	2	2	2	1	2	1	1	2	1	1	1	1	1	1	1	2	1	1
463	1	2	2	1	1	2	2	2	1	1	1	1	1	2	1	1	1	1	1	1	2	1	1	1	2	2	1	2	1	2	1	1	1	1	1	2	1	2
464	1	2	1	1	1	2	1	1	1	1	1	1	1	1	1	1	2	1	2	1	1	1	2	2	2	1	1	2	1	1	1	1	1	1	1	2	1	1
465	1	1	1	1	2	2	2	1	1	2	1	1	1	1	1	1	1	1	1	1	1	1	2	2	2	1	1	1	1	1	1	1	1	1	1	1	1	1
466	1	1	1	1	2	2	2	1	1	1	1	1	1	1	1	1	1	1	1	1	1	1	2	1	1	2	1	1	1	1	1	1	1	1	1	1	1	1
467	1	1	1	1	1	2	2	1	2	1	1	1	1	1	1	1	1	2	1	1	1	2	1	2	1	2	2	1	1	1	1	1	1	1	1	1	1	1
468	1	2	2	1	1	1	1	1	1	1	1	1	1	1	1	1	1	2	1	1	1	2	1	2	1	2	1	1	1	1	2	1	1	1	1	1	1	1
469	1	1	2	1	2	2	2	1	1	1	1	1	1	1	1	1	1	1	2	1	1	1	2	1	1	1	1	1	1	2	1	1	1	1	1	1	1	1
470	1	1	1	1	1	2	2	1	1	1	1	1	1	1	1	1	1	1	1	1	1	2	2	1	2	1	1	1	1	1	1	1	1	1	1	1	1	1
471	1	1	2	1	1	2	2	1	1	1	1	1	1	1	1	1	1	1	2	1	1	1	1	1	1	1	1	1	1	1	1	1	1	1	1	1	1	1
472	1	1	1	1	1	2	2	1	1	1	1	1	1	1	1	1	1	1	1	1	1	1	1	1	1	1	1	1	1	1	1	1	1	1	1	1	1	1
473	1	1	2	1	2	2	2	1	1	1	1	1	1	1	1	1	1	1	1	1	1	1	2	2	2	1	1	1	1	1	1	1	1	1	1	1	1	1
474	1	1	1	1	1	2	2	1	2	1	1	1	1	1	1	1	1	1	2	2	1	1	1	1	2	1	1	1	1	1	2	1	1	1	1	2	1	1
475	1	1	2	1	1	2	2	1	1	1	1	1	1	1	1	1	1	1	2	2	1	2	2	1	1	2	1	1	1	1	1	1	1	1	1	1	1	1
476	1	2	1	1	1	2	2	1	1	1	1	1	1	1	1	1	1	1	2	1	1	1	1	1	2	2	2	1	1	1	2	1	1	1	1	1	1	1
477	1	1	1	1	1	2	1	1	2	1	1	1	1	1	1	1	1	1	1	1	1	1	1	1	1	1	1	1	1	1	1	1	1	1	1	1	1	1
478	1	2	2	1	1	2	1	1	1	1	1	1	1	1	1	1	1	1	1	1	1	1	1	1	2	1	1	1	1	1	1	1	1	1	1	1	1	1
479	1	2	1	1	1	2	2	1	1	1	1	1	1	1	1	1	1	1	1	1	1	1	2	1	1	1	1	1	1	1	1	1	1	1	1	1	1	1
480	1	1	2	1	1	2	2	1	2	1	1	1	1	1	1	1	1	2	2	2	2	2	2	1	1	1	1	1	1	1	1	1	1	1	1	1	1	1
481	1	1	2	1	1	2	1	1	2	1	1	1	1	1	1	1	1	1	2	1	1	1	1	1	1	1	1	1	1	1	1	1	1	1	1	1	1	1
482	1	2	2	1	1	1	1	1	2	1	1	1	1	1	1	1	1	1	1	1	2	1	1	2	2	2	2	1	1	1	1	1	1	1	1	2	1	1
483	1	1	2	1	1	2	2	1	1	1	1	1	1	1	1	1	1	1	1	1	1	1	2	1	1	2	2	1	1	1	1	1	1	1	1	1	1	1
484	1	1	2	1	1	1	1	1	1	1	1	1	1	1	1	1	1	1	1	1	1	2	2	1	2	1	1	1	1	1	1	1	1	1	1	1	1	1
485	1	1	2	1	1	2	2	1	1	1	1	1	1	1	1	1	1	1	2	2	1	1	1	1	2	2	2	1	1	1	1	1	1	1	1	1	1	1
486	1	2	2	1	1	1	1	1	1	1	1	1	1	1	1	1	1	1	1	1	1	1	1	2	2	2	2	1	1	1	2	1	2	1	1	1	1	1
487	1	1	1	1	2	2	2	1	1	1	1	1	1	1	1	1	1	1	1	1	1	1	1	1	1	1	1	1	1	1	1	1	1	1	1	1	1	1
488	1	1	1	1	2	2	1	1	1	1	1	1	1	1	1	1	1	2	1	2	1	2	1	2	1	2	1	1	1	1	1	1	1	1	1	1	1	1
489	1	1	2	1	1	1	1	2	1	1	1	1	1	1	1	1	1	1	1	1	1	1	1	1	1	2	1	1	1	1	1	1	1	1	1	1	1	1
490	1	1	1	1	1	1	1	1	1	1	1	1	1	1	1	1	1	2	1	1	1	2	2	1	1	2	1	1	1	1	1	1	1	1	1	1	1	1
491	1	1	2	1	1	2	1	1	1	1	1	1	1	1	1	1	1	1	2	2	1	1	1	1	1	1	1	1	1	1	1	1	1	1	1	1	1	1
492	1	1	2	1	1	2	2	1	1	1	1	1	1	1	1	1	1	1	2	2	1	1	2	1	1	1	1	1	1	1	1	1	1	1	1	1	1	1
493	1	1	2	1	2	2	2	1	1	1	1	1	1	1	1	1	2	1	2	1	1	1	1	1	1	2	2	1	1	1	1	1	1	1	1	1	1	1
494	1	1	2	1	1	2	2	1	1	1	1	1	1	1	1	1	1	1	2	2	1	1	1	1	2	2	1	1	1	1	1	1	1	1	1	1	1	1
495	1	2	1	1	2	2	2	1	2	1	1	1	1	1	1	1	1	2	1	2	1	2	1	2	1	2	1	2	1	1	1	1	1	2	2	2	2	1
496	1	1	2	1	2	1	1	1	2	1	1	1	1	1	1	1	1	2	1	1	1	2	2	1	1	1	1	1	1	1	1	1	1	1	1	1	1	1
497	1	1	1	1	1	2	2	1	1	1	1	1	1	1	1	1	1	2	1	2	1	2	2	1	2	1	1	1	1	1	1	1	1	1	1	1	1	1
498	1	1	2	1	1	1	1	1	1	1	1	1	1	1	1	1	1	1	1	1	1	2	2	1	2	1	1	1	1	1	1	1	1	1	1	1	1	1
499	1	2	1	1	1	2	2	1	1	1	1	1	1	1	1	1	1	1	1	1	1	1	1	1	2	2	2	1	1	1	1	1	1	1	1	1	1	1
500	1	2	2	1	1	2	2	1	1	1	1	1	1	1	1	1	1	1	2	2	1	1	1	1	1	1	1	1	1	1	1	1	1	1	1	1	1	1
501	1	2	1	1	1	2	2	1	1	1	1	1	1	1	1	1	1	2	2	1	1	2	1	1	1	2	2	1	1	2	2	1	1	1	1	1	1	1
502	1	1	2	1	2	2	1	1	1	1	1	1	1	1	1	1	1	1	1	1	1	1	1	1	1	2	1	1	1	1	1	1	1	1	1	1	1	1
503	1	2	2	1	2	1	1	1	1	1	1	1	1	1	1	1	1	1	1	1	1	1	2	2	2	2	1	1	1	1	1	1	1	1	1	1	1	1
504	1	2	1	1	1	2	1	1	1	1	1	1	1	2	1	1	1	2	1	1	1	2	1	1	2	1	1	2	1	1	1	1	1	1	1	1	1	1
505	1	1	1	1	1	2	2	1	2	1	1	1	1	1	1	1	1	2	1	1	2	2	2	1	2	2	1	1	1	1	1	1	1	1	1	1	1	1
506	1	2	1	1	1	2	2	1	2	1	1	1	1	1	1	1	1	2	1	1	1	2	2	1	1	2	2	1	1	1	1	1	1	1	1	1	1	1
507	1	1	2	1	2	2	2	1	1	1	1	1	1	1	1	1	1	1	1	1	1	1	2	1	1	1	1	1	1	1	1	1	1	1	1	1	1	1
508	1	1	1	1	2	1	1	1	1	1	1	1	1	1	1	1	1	1	1	1	1	1	2	1	1	2	1	1	1	1	1	1	1	1	1	1	1	1
509	1	1	1	1	2	2	2	1	1	1	1	1	1	1	1	1	1	1	1	1	1	2	2	1	1	2	1	1	1	1	1	1	1	1	1	1	1	1
510	1	2	1	1	2	2	2	1	1	1	1	1	1	1	1	1	2	1	1	1	1	1	1	1	2	2	1	1	1	2	1	2	1	1	1	1	1	1
511	1	2	2	1	1	2	2	1	1	2	1	1	1	1	1	1	1	1	2	1	2	1	1	2	2	2	2	1	1	1	1	1	1	1	1	1	1	1
512	1	2	2	1	1	2	2	1	1	1	1	1	1	1	1	1	1	1	1	1	1	1	1	1	2	1	2	1	1	1	1	1	1	1	1	1	1	1
513	1	1	2	1	2	2	2	1	1	1	1	1	1	1	1	1	1	1	2	2	1	1	1	1	2	2	2	1	1	1	1	1	1	1	1	1	1	1
514	1	2	2	1	1	2	2	1	1	1	1	1	1	1	1	1	2	2	1	1	1	2	2	2	2	2	2	1	1	1	1	1	1	1	1	2	1	1
515	1	2	1	1	1	2	2	1	1	1	1	1	1	1	1	1	2	1	1	2	1	1	1	1	1	2	2	1	1	2	1	1	1	1	1	1	1	1
516	1	2	2	1	1	1	1	1	1	1	1	1	1	1	1	1	2	1	1	1	1	1	1	1	2	1	1	1	1	1	1	1	2	1	1	1	2	1
517	1	2	1	1	1	1	1	1	1	1	1	1	1	1	1	1	1	1	1	1	1	1	1	1	1	1	1	1	1	1	1	1	1	1	1	1	2	1
518	1	2	2	1	1	2	2	1	1	1	1	1	1	1	1	1	1	1	1	1	1	1	1	2	2	2	2	1	1	2	1	1	1	1	1	1	1	1
519	1	1	2	1	2	1	1	1	1	1	1	1	1	1	1	1	1	1	1	1	1	2	2	2	2	2	2	1	1	1	1	1	1	1	1	1	1	1
520	1	1	1	1	1	2	2	1	2	1	1	1	1	1	1	1	1	1	1	1	1	1	1	1	1	2	1	1	1	1	1	1	1	1	1	1	1	1
521	1	1	2	1	2	2	1	1	1	1	1	1	1	1	1	1	2	1	1	1	1	1	1	1	1	1	1	1	1	1	1	1	1	1	1	1	1	1
522	1	2	1	1	1	2	2	2	1	1	1	1	1	1	1	1	1	1	2	2	1	1	2	2	2	2	2	1	1	1	1	1	1	1	1	1	1	1
523	1	2	2	1	1	2	1	1	1	1	1	1	1	1	1	1	1	1	1	1	1	1	2	2	2	2	2	1	1	2	2	1	2	1	1	1	1	1
524	1	1	2	1	1	2	2	1	1	1	1	1	1	1	1	1	1	2	1	1	1	2	1	1	1	2	2	1	1	1	1	1	1	1	1	1	1	1
525	1	2	1	1	1	2	2	1	1	1	1	1	1	1	1	1	1	1	1	1	1	1	1	1	1	1	1	1	1	1	1	1	1	1	1	1	1	1
526	1	2	1	1	1	2	2	1	1	1	1	1	1	1	1	1	1	1	1	2	1	1	1	1	1	2	2	1	1	1	1	1	1	1	1	1	1	1
527	1	2	1	1	1	2	2	1	1	1	1	1	1	1	1	1	1	1	1	2	1	1	1	1	1	1	1	1	1	1	1	1	1	1	1	1	1	1
528	1	1	2	1	1	2	1	1	1	1	1	1	1	1	1	1	1	2	1	1	1	1	1	1	1	1	1	1	1	1	1	2	1	1	1	2	1	1
529	1	2	2	1	2	1	1	1	1	1	1	1	1	1	1	1	1	1	1	1	1	1	1	1	1	2	2	1	1	1	1	1	1	2	1	1	1	1
530	1	2	1	1	2	1	1	1	1	1	1	1	1	1	1	1	2	1	2	2	1	1	1	1	1	2	1	1	1	2	1	1	1	1	1	1	1	1
531	1	2	1	1	1	2	2	1	1	1	1	1	1	1	1	1	1	1	1	1	1	1	1	1	1	1	1	1	1	1	1	1	1	1	1	1	1	1
532	1	1	1	1	1	1	1	1	1	1	1	1	1	1	1	1	1	1	1	1	1	1	1	1	1	2	1	1	1	1	1	1	1	1	1	1	1	1
533	1	2	2	1	1	2	1	1	1	1	1	1	1	1	1	1	1	1	2	1	1	2	2	1	1	1	1	1	1	1	1	1	1	1	1	1	1	1
534	1	2	2	1	2	2	1	1	1	2	1	1	1	1	1	1	1	1	2	1	1	1	2	2	2	2	2	1	1	1	1	1	1	1	1	2	1	2
535	1	2	1	1	2	2	2	1	1	1	1	1	1	1	1	1	1	2	1	1	1	2	2	1	1	2	1	1	1	1	1	1	1	2	1	2	1	1
536	1	1	1	1	1	2	2	1	1	2	1	1	1	1	1	1	1	1	1	1	1	1	1	1	1	2	1	1	1	1	1	1	1	1	1	1	1	1
537	1	2	2	1	1	2	2	2	1	2	1	1	1	1	1	1	1	1	2	2	1	1	2	2	2	2	2	1	1	1	1	1	1	2	2	1	1	2
538	1	2	1	1	1	2	1	1	1	1	1	1	1	1	1	1	1	1	1	1	1	1	1	1	2	2	2	1	1	1	1	1	1	1	1	1	1	1
539	1	2	1	1	2	1	1	1	1	1	1	1	1	1	1	1	1	2	1	1	1	2	2	1	2	2	1	1	1	1	1	1	1	1	1	1	1	1
540	1	1	1	1	1	2	1	1	1	1	1	1	1	1	1	1	1	1	1	1	1	1	1	1	2	2	2	1	1	1	1	1	1	1	1	1	1	1
541	1	2	2	1	1	2	2	1	1	1	1	1	1	1	1	1	1	1	1	1	1	1	1	2	2	2	2	1	1	1	1	1	1	1	1	1	2	1
542	1	2	2	1	1	2	2	1	1	1	1	1	1	1	1	1	2	1	1	2	1	1	2	1	2	2	1	1	1	1	1	1	2	1	1	1	2	1
543	1	1	2	1	1	2	2	1	1	1	1	1	1	1	1	1	1	2	1	1	1	2	1	2	1	1	1	1	1	1	1	1	1	1	1	1	1	1
544	1	1	1	1	1	2	2	1	1	1	1	1	1	1	1	1	1	2	2	2	1	2	2	1	1	2	1	1	1	1	1	1	1	1	1	1	1	1
545	1	1	1	1	2	1	1	1	1	1	1	1	1	1	1	1	1	1	1	1	1	1	1	1	1	2	2	1	1	1	1	1	1	1	1	1	1	1
546	1	1	1	1	2	2	2	1	1	1	1	1	1	1	1	1	1	1	1	1	1	1	1	1	1	2	1	1	1	1	1	1	1	1	1	2	2	1
547	1	2	1	1	2	2	2	1	1	1	1	1	1	1	1	1	1	1	2	2	2	1	1	1	2	1	1	1	1	1	2	1	1	1	1	2	2	1
548	1	1	1	1	2	2	2	1	2	1	1	1	1	1	1	1	1	2	1	1	1	2	2	1	1	2	1	1	1	1	1	1	1	1	1	1	1	1
549	1	1	2	1	2	2	2	1	1	1	1	1	1	1	1	1	1	1	2	2	1	2	2	1	1	1	1	1	1	1	1	1	1	1	1	1	1	1
550	1	1	2	1	2	2	2	1	2	1	1	1	1	1	1	1	1	1	1	1	1	2	2	1	1	1	1	1	1	1	1	1	1	1	1	1	2	2
551	1	2	1	1	1	2	2	1	1	1	1	1	1	1	1	1	1	1	1	1	1	1	2	1	1	2	2	1	1	1	1	1	1	1	1	1	1	1
552	1	1	1	1	1	2	1	1	1	1	1	1	1	1	1	1	1	1	1	1	1	1	2	2	2	2	2	1	1	1	1	1	1	1	1	1	1	1
553	1	2	1	1	1	2	2	1	1	1	1	1	1	1	1	1	1	1	1	1	1	1	2	1	1	2	1	1	1	1	1	1	1	1	1	1	1	1
554	1	1	1	1	1	2	2	1	2	1	1	1	1	1	1	1	1	2	1	1	1	2	2	1	2	2	1	1	1	1	1	1	1	1	1	1	1	1
555	1	1	2	1	1	2	2	1	1	1	1	1	1	1	1	1	1	1	2	1	1	1	1	1	1	1	1	1	1	1	1	1	1	1	1	1	1	1
556	1	1	1	1	1	2	2	1	1	1	1	1	1	1	1	1	1	1	1	1	1	1	2	2	2	2	2	1	1	1	1	1	1	1	1	1	1	1
557	1	1	2	1	1	2	1	1	2	1	1	1	1	1	1	1	1	1	1	2	1	1	1	2	2	1	1	1	1	1	1	1	1	1	1	1	1	1
558	1	2	2	1	1	2	2	1	1	1	1	1	1	1	1	1	1	1	2	2	1	1	1	2	2	1	1	2	1	1	1	1	1	1	1	1	1	1
559	1	1	2	1	2	1	1	1	2	1	1	1	1	1	1	1	1	1	1	1	1	1	2	1	2	2	1	1	1	1	1	1	1	1	1	1	1	1
560	1	2	2	1	1	2	2	1	1	1	1	1	1	1	1	1	2	1	2	2	1	2	2	2	2	1	1	1	1	1	1	1	1	1	1	1	1	1
561	1	1	1	1	1	1	1	1	1	1	1	1	1	1	1	1	1	1	1	2	1	1	2	2	2	2	2	1	1	1	1	1	1	1	1	1	1	1
562	1	2	2	1	1	2	1	1	1	1	1	1	1	1	1	1	1	1	2	1	1	1	1	2	2	2	2	1	1	1	1	1	1	1	1	1	1	1
563	1	1	1	1	2	2	2	1	1	1	1	1	1	1	1	1	1	2	1	1	1	2	2	1	2	2	1	1	1	2	1	1	1	1	1	1	2	1
564	1	1	2	1	1	2	2	1	1	1	1	1	1	1	1	1	1	2	1	2	1	2	2	1	1	1	1	1	1	1	1	1	1	1	1	1	1	1
565	1	2	2	1	1	2	2	1	1	1	1	1	1	1	1	1	1	1	2	2	2	1	2	2	2	2	1	1	1	1	1	1	1	1	1	1	1	1
566	1	1	2	1	1	1	1	1	1	1	1	1	1	1	1	1	1	1	1	1	1	2	2	1	2	1	1	1	1	1	1	1	1	1	1	1	1	1
567	1	1	1	1	1	2	2	1	1	1	1	1	1	1	1	1	1	2	1	1	1	2	1	1	1	1	1	1	1	1	1	1	1	1	1	1	1	1
568	1	1	2	1	2	2	2	1	2	1	1	1	1	1	1	1	1	2	1	1	1	2	2	1	2	2	2	1	1	1	1	1	1	1	1	1	1	1
569	1	1	2	1	1	2	2	1	1	1	1	1	1	1	1	1	2	1	1	1	1	1	2	1	1	1	1	1	1	2	1	2	1	1	2	1	2	1
570	1	1	2	1	1	2	2	1	1	1	1	1	1	1	1	1	1	1	1	1	1	1	1	2	2	2	2	1	1	1	1	1	1	1	1	1	1	1
571	1	2	1	1	1	2	2	1	1	1	1	1	1	1	1	1	1	1	1	1	1	1	2	2	2	2	2	1	1	1	1	1	1	1	1	1	1	1
572	1	2	2	1	2	2	2	1	1	2	1	1	1	1	1	1	1	1	1	1	1	1	1	1	1	2	2	2	1	1	1	1	1	1	1	2	2	2
573	1	1	1	1	1	2	2	1	1	1	1	1	1	1	1	1	1	2	1	1	1	2	2	1	1	2	1	1	1	2	1	1	2	1	1	1	1	1
574	1	1	1	1	1	2	2	1	1	1	1	1	1	1	1	1	1	1	1	1	1	1	1	1	1	1	1	1	1	1	1	1	1	1	1	1	1	1
575	1	2	1	1	1	2	2	2	1	1	1	1	1	1	1	1	1	1	1	1	1	1	1	2	2	2	2	1	1	2	2	1	1	1	1	1	2	1
576	1	2	1	1	1	2	2	2	1	1	1	1	1	1	1	1	1	1	1	1	1	1	1	1	2	2	2	2	1	1	1	1	1	1	1	2	2	2
577	1	2	2	1	1	2	2	1	1	1	1	1	1	2	1	1	1	1	2	2	1	1	1	2	2	2	1	1	1	1	1	1	1	1	1	1	1	1
578	1	2	1	1	1	1	1	1	1	1	1	1	1	1	1	1	1	1	1	1	2	1	1	1	2	1	1	1	1	1	1	1	2	1	1	1	2	1
579	1	2	2	2	1	2	2	1	1	2	1	2	1	1	2	1	1	2	2	2	2	1	1	2	2	1	1	1	2	1	1	2	2	1	1	1	2	2
580	1	2	1	1	2	2	1	1	1	1	1	1	1	1	1	1	1	2	1	1	1	1	1	2	2	2	2	1	1	2	2	1	1	1	2	2	2	1
581	1	2	1	1	2	2	1	1	1	1	1	1	1	1	1	1	1	1	1	2	1	1	1	2	2	1	1	1	1	1	2	1	1	1	1	1	2	1
582	1	2	1	1	2	2	1	1	1	1	1	1	1	1	1	1	1	1	1	1	1	1	1	1	1	2	2	1	1	2	1	1	1	1	1	1	2	2
583	1	1	1	1	1	2	2	1	1	1	1	1	1	1	1	1	1	1	1	2	1	1	2	1	1	2	2	1	1	2	1	1	1	1	1	1	1	1
584	1	1	2	1	2	2	2	1	2	1	1	1	1	1	1	1	1	1	2	2	1	1	1	1	2	1	1	1	1	1	1	1	1	1	1	1	1	1
585	1	1	2	1	1	2	1	1	2	1	1	1	1	1	1	1	1	1	2	2	1	1	2	2	2	1	1	1	1	1	1	1	1	1	1	1	1	1
586	1	2	1	1	1	2	2	1	1	1	1	1	1	1	1	1	1	2	1	1	1	2	1	1	1	2	1	1	1	1	1	1	1	1	1	1	2	1
587	1	2	1	1	1	2	1	1	1	1	1	1	1	1	1	1	1	1	1	1	1	1	1	1	1	2	2	1	1	1	1	1	1	1	1	1	1	1
588	1	1	1	1	1	2	2	1	1	1	1	1	1	1	1	1	1	1	1	1	1	1	1	1	1	1	1	1	1	1	1	1	1	1	1	1	1	1
589	1	1	1	1	1	2	2	1	1	1	1	1	1	1	1	1	1	1	1	1	1	1	2	2	2	2	2	1	1	1	1	1	1	1	1	1	1	1
590	1	1	1	1	2	2	2	1	1	1	1	1	1	1	1	1	1	1	1	2	1	1	1	1	1	1	1	1	1	1	1	1	1	1	1	1	1	1
591	1	1	1	1	2	2	2	1	1	1	1	1	1	1	1	1	1	1	1	1	1	1	2	2	2	2	2	1	1	1	1	1	1	1	1	1	1	1
592	1	2	1	1	1	2	1	1	1	1	1	1	1	2	1	1	1	1	1	2	1	1	2	2	2	2	2	1	1	1	2	1	1	1	1	1	2	1
593	1	2	1	1	1	2	2	2	1	1	1	1	1	1	1	1	1	2	2	1	2	1	1	2	2	2	2	2	2	2	1	1	1	1	1	1	2	2
594	1	1	2	1	1	2	1	1	1	1	1	1	1	1	1	1	1	1	2	1	1	1	2	2	2	1	1	1	1	1	1	2	2	1	1	1	1	1
595	1	1	1	1	1	2	2	1	1	1	1	1	1	1	1	1	1	2	2	1	1	2	1	1	1	2	1	1	1	2	1	1	2	1	1	1	1	1
596	1	2	2	1	1	2	2	1	1	1	1	1	1	1	1	1	1	1	2	1	1	1	2	1	2	2	2	1	2	1	1	1	1	1	1	1	1	1
597	1	1	1	1	2	1	1	1	1	1	1	1	1	1	1	1	1	1	1	1	1	1	1	1	2	2	2	1	1	1	1	1	1	1	1	1	1	1
598	1	2	2	1	1	2	1	1	1	1	1	1	1	1	1	1	1	1	2	1	1	1	1	1	2	1	1	1	1	1	1	1	2	1	1	1	2	1
599	1	1	1	1	1	1	1	1	1	1	1	1	1	1	1	1	1	2	1	1	1	2	1	2	1	2	2	1	1	1	1	1	1	1	1	1	2	1
600	1	2	1	1	1	2	1	1	1	1	1	1	1	1	1	1	1	1	1	1	1	1	1	1	1	2	2	2	1	1	1	1	1	2	2	1	2	1
601	1	1	2	1	1	2	2	1	1	1	1	1	1	1	1	1	1	1	2	2	1	1	2	1	1	1	1	1	1	1	1	1	1	1	1	1	1	1
602	1	1	2	1	2	2	1	1	2	1	1	1	1	1	1	1	1	1	1	2	1	1	1	1	1	2	2	1	2	1	1	1	1	1	1	1	1	1
603	1	2	1	2	1	2	2	2	1	2	1	2	1	2	1	1	1	1	1	1	2	1	2	1	2	2	2	2	2	1	1	2	2	1	2	1	2	2
604	1	2	2	1	1	1	2	1	1	1	1	2	1	1	1	1	1	1	1	1	1	1	2	2	2	2	2	1	1	1	1	1	1	1	1	1	1	1
605	1	1	1	1	1	1	1	1	2	1	1	1	1	1	1	1	1	1	1	1	1	1	1	2	2	2	2	1	1	1	1	1	1	1	1	1	1	1
606	1	1	2	1	1	1	1	1	2	1	1	1	1	1	1	1	1	1	1	1	1	1	2	1	1	2	2	1	1	1	1	1	1	1	1	1	1	1
607	1	1	2	1	2	2	2	1	1	1	1	1	1	1	1	1	1	1	2	2	1	2	2	1	1	1	1	1	1	1	1	1	1	1	1	1	1	1
608	1	1	2	1	1	1	1	2	1	1	1	1	1	1	1	1	2	2	1	1	2	2	1	2	1	2	1	1	1	1	1	2	1	1	1	1	2	1
609	1	2	2	1	1	1	1	1	1	1	1	1	1	2	1	1	1	1	1	1	1	1	1	1	1	1	1	1	1	1	1	1	1	1	1	1	2	1
610	1	1	1	1	1	2	2	1	1	1	1	1	1	1	1	1	1	1	1	2	1	1	1	1	1	1	1	1	1	2	1	1	1	1	1	1	1	1
611	1	2	2	1	2	1	1	1	1	1	1	1	1	1	1	1	1	1	1	1	1	1	1	2	2	2	2	1	1	1	1	1	1	1	1	1	2	1
612	1	1	1	1	1	1	1	1	1	1	1	1	1	1	1	1	2	1	1	1	1	1	1	1	1	2	2	1	1	2	1	1	2	2	1	1	2	1
613	1	2	2	1	2	2	2	1	1	1	1	1	1	1	1	1	1	1	1	1	1	1	1	1	2	2	1	1	1	1	1	1	1	1	1	1	1	1
614	1	2	1	1	1	2	1	1	1	1	1	1	1	1	1	1	1	1	1	1	1	1	2	1	1	1	1	1	1	1	1	1	1	1	1	1	1	1
615	1	1	2	1	1	2	1	1	1	1	1	1	1	1	1	1	1	2	1	1	1	2	1	2	1	2	2	1	1	1	1	1	1	1	1	1	1	1
616	1	1	1	1	1	2	2	1	1	1	1	1	1	1	1	1	1	2	1	1	2	2	1	1	1	2	2	1	1	1	1	1	1	1	1	1	1	1
617	1	2	1	1	1	1	1	1	1	1	1	1	1	1	1	1	1	1	2	1	1	1	2	2	2	2	2	2	2	1	1	1	1	1	1	1	2	2
618	1	2	2	1	1	2	1	1	1	1	1	1	1	1	1	1	1	2	2	2	1	2	2	2	2	2	1	1	1	1	1	1	1	1	1	1	1	1
619	1	2	1	1	1	2	1	1	1	1	1	1	1	1	1	1	2	1	2	2	2	1	1	1	1	2	2	1	1	2	1	1	2	1	1	1	2	1
620	1	2	2	1	1	2	1	1	1	1	1	1	1	1	1	1	1	1	2	2	2	1	1	2	2	2	2	1	1	1	1	1	1	1	1	1	1	1
621	1	1	1	1	2	1	1	1	1	1	1	1	1	1	1	1	1	1	1	1	1	1	1	2	2	2	1	1	1	1	1	1	1	1	1	1	1	1
622	1	1	2	1	1	2	1	1	2	1	1	1	1	1	1	1	1	2	1	2	1	1	1	2	2	2	1	1	1	1	1	1	1	2	1	1	1	1
623	1	2	1	1	1	2	2	1	1	1	1	1	1	1	1	1	1	2	1	1	1	2	1	1	1	2	1	1	1	1	1	2	2	1	1	2	2	2
624	1	1	2	1	2	2	2	1	1	1	1	1	1	1	1	1	1	1	1	1	1	1	1	1	1	2	2	1	1	1	1	1	1	1	1	1	1	1
625	1	2	2	1	1	2	2	1	1	1	1	1	1	1	1	1	1	2	2	1	1	2	2	1	1	2	1	1	1	1	1	1	1	1	2	1	1	1
626	1	1	2	1	1	2	1	1	1	1	1	1	1	1	1	1	1	2	2	2	1	2	2	1	2	2	1	1	1	1	1	1	1	1	1	1	1	1
627	1	1	2	1	2	2	2	1	2	1	1	1	1	1	1	1	1	1	2	2	1	2	2	1	1	1	1	1	1	1	1	1	1	1	1	1	1	1
628	1	1	1	1	1	2	2	1	1	1	1	1	1	1	1	1	1	2	1	1	1	2	2	1	1	2	1	1	1	1	1	1	1	1	1	1	1	1
629	1	2	2	1	2	2	1	1	1	1	1	1	1	1	1	1	1	1	1	1	2	1	1	1	1	2	1	1	1	1	1	1	1	1	1	1	2	1
630	1	2	1	1	2	2	2	1	2	1	1	1	1	1	1	1	1	1	1	1	1	1	2	1	1	2	2	1	1	1	1	1	1	1	1	1	1	1
631	1	1	2	1	2	2	2	1	1	1	1	1	1	1	1	1	1	1	2	2	1	1	2	1	1	2	1	1	1	1	1	1	1	1	1	1	1	1
632	1	1	2	1	2	2	2	1	2	1	1	1	1	1	1	1	1	1	1	1	1	2	2	1	2	1	2	1	1	1	1	1	1	1	1	1	1	1
633	1	1	1	1	2	2	1	1	1	1	1	1	1	1	1	1	1	2	2	2	1	2	2	1	1	1	1	1	1	1	1	1	1	1	1	1	1	1
634	1	2	1	1	2	2	2	1	1	1	1	1	1	1	1	1	1	1	2	1	1	2	2	1	1	2	1	2	1	1	1	1	1	1	1	1	1	1
635	1	2	1	1	1	2	1	1	1	1	1	1	1	1	1	1	1	1	1	1	1	1	2	1	1	2	1	1	1	1	1	1	1	1	1	1	1	1
636	1	1	1	1	1	2	1	1	1	1	1	1	1	1	1	1	1	1	1	1	1	1	1	1	1	1	1	1	1	1	1	1	1	1	1	1	1	1
637	1	2	1	1	2	1	1	1	2	1	1	1	1	1	1	1	1	2	1	1	2	2	1	1	1	2	2	1	1	1	1	1	1	1	1	1	1	1
638	1	2	2	1	2	1	1	1	2	1	1	1	1	1	1	1	1	1	2	2	1	1	1	2	2	1	1	1	1	1	1	1	1	1	1	1	1	1
639	1	2	1	1	1	2	2	1	1	2	1	2	1	2	1	1	1	1	1	2	1	1	1	2	2	2	2	1	2	1	1	1	2	1	2	2	2	2
640	1	1	1	1	1	2	2	1	2	1	2	1	1	1	1	1	1	1	1	1	1	1	1	1	1	1	1	1	1	1	1	1	1	1	1	1	1	1
641	1	1	2	1	2	2	2	1	1	1	1	1	1	1	1	1	1	1	1	1	1	2	2	1	2	1	1	1	1	1	1	1	1	1	1	1	1	1
642	1	2	2	1	1	2	2	1	1	1	1	1	1	2	1	1	1	2	2	2	1	2	1	1	1	1	1	1	1	2	1	1	1	1	1	1	1	1
643	1	1	2	1	1	2	2	1	1	1	1	1	1	1	1	1	1	2	1	1	1	2	1	2	1	2	1	1	1	1	1	1	1	1	1	1	2	1
644	1	2	1	1	1	2	2	1	1	1	1	1	1	1	2	1	2	2	2	2	2	2	2	1	2	1	1	1	2	2	1	1	1	1	2	2	2	1
645	1	2	2	1	1	2	2	1	1	1	1	1	1	1	1	1	1	1	1	1	1	1	1	2	2	1	1	1	1	2	2	1	1	1	1	2	2	1
646	1	1	2	1	1	2	2	1	2	1	1	1	1	1	1	1	2	1	1	1	1	1	1	1	2	2	2	1	1	1	2	1	1	1	1	1	2	1
647	1	1	1	1	2	2	2	1	1	1	1	1	1	1	1	1	1	2	1	1	1	2	1	1	1	2	2	1	1	1	1	1	1	1	1	1	1	1
648	1	2	2	1	1	2	2	1	1	1	1	1	1	1	1	1	1	2	2	2	1	2	2	1	1	1	1	1	1	1	1	1	1	1	1	2	2	1
649	1	1	1	1	1	1	1	1	1	1	1	1	1	1	1	1	1	2	1	1	1	2	2	1	1	2	1	1	1	1	1	1	1	1	1	1	1	1
650	1	1	2	1	1	2	1	1	1	1	1	1	1	1	1	1	1	1	1	1	1	1	1	2	2	1	1	1	1	1	1	1	1	1	1	1	1	1
651	1	1	2	1	2	2	2	1	2	1	1	1	1	1	1	1	1	1	2	2	1	1	1	2	2	2	1	1	1	1	1	1	1	1	1	1	2	1
652	1	2	1	1	1	2	2	1	1	1	1	1	1	1	1	1	1	1	1	2	1	1	1	1	2	2	2	1	2	1	1	1	1	1	1	2	2	1
653	1	1	1	1	2	2	2	1	2	1	2	1	1	1	1	1	1	1	1	1	1	1	1	1	2	1	1	1	1	2	1	1	1	1	1	2	2	1
654	1	1	1	1	2	1	2	1	1	1	1	1	1	1	1	1	1	1	1	1	1	1	1	1	1	1	1	1	1	1	1	1	1	1	1	1	1	1
655	1	1	1	1	1	2	2	1	2	2	1	1	1	1	1	1	1	1	1	1	1	1	2	2	2	2	2	1	1	1	1	1	1	1	1	1	1	2
656	1	2	1	1	1	2	2	1	1	2	1	1	1	1	1	1	1	1	1	1	1	1	1	1	1	2	1	1	1	1	1	1	1	1	1	2	2	1
657	1	1	1	1	2	2	2	1	1	1	1	1	1	1	1	1	1	2	1	1	1	2	1	1	1	2	1	1	1	1	1	1	1	1	1	1	1	1
658	1	2	1	1	1	1	1	1	1	1	1	1	1	1	1	1	1	1	1	1	1	1	2	2	2	2	2	2	1	1	1	1	1	1	2	1	2	1
659	1	2	2	1	1	2	1	1	2	2	1	1	1	1	1	1	1	1	1	1	1	1	2	1	1	2	2	1	1	1	1	1	1	1	1	1	1	1
660	1	1	2	1	1	2	2	1	1	1	1	1	1	1	1	1	1	2	1	1	1	1	1	2	2	1	1	1	1	1	1	1	1	1	1	1	1	1
661	1	1	2	1	1	2	2	1	1	2	1	1	1	1	1	1	1	1	2	1	1	1	1	1	1	1	2	1	1	1	1	1	1	1	1	1	1	1
662	1	1	2	1	1	2	1	1	1	1	1	1	1	1	1	1	2	1	1	2	2	1	1	1	2	2	1	1	1	1	1	1	1	1	1	1	1	1
663	1	1	2	1	1	2	2	1	1	1	1	1	1	1	1	1	1	1	1	1	1	1	1	1	2	2	2	1	1	1	1	1	1	1	1	1	1	1
664	1	2	1	1	2	2	2	1	1	1	1	1	1	1	1	1	1	1	1	1	1	1	1	1	2	2	2	1	1	1	1	1	1	1	1	1	2	1
665	1	1	1	1	1	2	2	1	1	1	1	1	1	1	1	1	1	1	1	1	1	1	1	1	1	1	1	1	1	1	1	1	1	1	2	1	2	1
666	1	1	2	1	1	2	1	1	1	1	1	1	1	1	1	1	1	1	1	1	2	1	1	2	2	1	1	1	1	1	1	2	1	1	1	1	2	1
667	1	2	2	1	2	2	2	1	1	1	1	1	1	1	1	1	2	1	1	1	1	2	2	1	2	1	1	1	1	1	1	1	1	1	1	1	1	1
668	1	2	2	1	1	2	2	1	1	2	1	1	1	1	1	1	1	1	1	2	1	1	1	2	2	2	1	1	1	1	1	1	1	1	1	1	1	1
669	1	2	1	1	1	2	2	1	1	2	1	1	1	1	1	1	1	2	1	1	2	2	2	2	2	2	2	1	1	2	1	1	1	1	1	2	2	1
670	1	1	2	1	2	2	2	1	1	1	1	1	1	1	1	1	1	1	1	1	1	1	1	1	1	2	2	1	1	1	1	1	1	1	1	1	1	1
671	1	2	2	1	1	2	1	1	1	1	1	1	1	1	1	1	1	1	1	1	1	2	2	2	2	1	1	1	1	1	1	1	1	1	1	2	2	1
672	1	2	2	1	1	2	2	1	1	1	1	1	1	2	1	1	1	2	1	1	1	2	2	1	2	2	2	1	1	1	1	1	2	1	1	1	1	1
673	1	2	2	1	2	2	2	1	1	1	1	1	1	1	1	1	1	1	1	1	1	1	1	2	2	2	2	1	1	1	1	1	1	1	1	1	2	1
674	1	1	1	1	1	2	2	1	1	1	1	1	1	1	1	1	1	1	2	2	1	1	1	1	1	1	1	1	1	1	1	1	1	1	1	1	1	1
675	1	1	2	1	1	2	1	1	1	1	1	1	1	1	1	1	1	2	1	1	1	2	2	1	1	1	1	1	1	1	1	1	1	1	1	1	1	1
676	1	2	2	1	1	2	2	1	1	1	1	1	1	1	1	1	1	2	1	1	1	2	1	1	1	2	1	1	1	1	2	1	1	1	1	2	2	1
677	1	2	2	1	1	2	2	1	1	1	1	1	1	1	1	1	1	1	1	1	1	1	1	2	2	2	2	1	1	1	1	1	1	2	1	1	2	1
678	1	2	2	1	1	2	2	1	1	1	1	1	1	1	1	1	2	1	1	1	2	1	2	1	1	2	2	1	1	1	1	1	1	1	1	1	1	1
679	1	2	1	1	1	2	2	1	1	1	1	1	1	1	1	1	1	2	1	1	1	2	2	1	2	2	2	2	2	2	2	1	1	1	2	1	2	1
680	1	2	1	1	1	2	2	1	1	1	1	1	1	1	1	1	1	1	2	2	1	1	1	1	1	1	1	1	1	1	1	1	2	1	1	1	2	2
681	1	1	1	1	1	2	1	1	1	1	1	1	1	1	1	1	1	1	2	2	1	1	1	1	1	1	1	1	1	1	1	1	2	1	1	2	2	1
682	1	1	1	1	1	2	2	1	1	1	1	1	1	1	1	1	1	1	1	1	1	1	1	1	1	1	1	1	1	1	1	1	1	1	1	2	2	1
683	1	2	2	1	1	2	2	1	1	1	1	2	1	2	2	1	1	1	1	2	2	1	2	1	2	2	2	2	2	1	1	1	1	1	2	2	2	1
684	1	1	1	1	1	2	1	1	1	1	1	1	1	1	1	1	1	2	1	1	1	2	2	2	1	2	1	1	1	1	1	1	1	1	1	1	1	1
685	1	2	2	1	2	2	2	1	1	1	1	1	1	1	1	1	1	2	1	1	1	1	1	2	2	2	2	2	1	1	2	1	2	1	1	2	2	2
686	1	1	2	2	1	2	2	1	1	1	1	1	1	1	1	1	1	1	1	1	1	1	2	1	1	1	1	1	1	1	1	1	1	1	1	1	1	1
687	1	1	2	1	1	2	2	1	1	1	1	1	1	1	1	1	1	1	2	2	1	1	1	2	1	2	2	1	1	1	1	1	1	1	1	1	1	1
688	1	1	2	1	1	2	2	2	1	2	1	1	1	1	1	1	1	2	1	2	1	2	1	2	1	2	1	2	1	1	1	1	1	1	1	2	2	1
689	1	2	1	1	1	2	2	1	1	1	1	1	1	1	1	1	2	2	1	1	1	2	2	1	2	2	1	1	1	1	1	1	1	1	1	1	2	1
690	1	2	2	1	2	2	1	1	1	1	1	1	1	1	1	1	1	1	1	1	1	1	2	2	2	2	2	1	1	1	1	1	1	1	1	2	2	1
691	1	1	1	1	2	1	1	1	1	1	1	1	1	1	1	1	1	1	1	1	1	1	1	1	1	2	2	1	1	1	1	1	1	1	1	1	1	1
692	1	1	1	1	1	2	2	1	1	1	1	1	1	1	1	1	1	1	2	2	1	1	2	2	2	2	2	1	1	1	1	1	1	1	1	1	1	1
693	1	1	2	1	1	2	2	1	1	1	1	1	1	1	1	1	1	1	2	2	1	1	1	1	2	2	2	1	1	1	2	1	1	1	1	2	2	1
694	1	2	1	1	1	2	2	1	1	1	1	1	1	1	1	1	1	1	1	2	1	1	1	2	2	2	2	1	1	1	2	1	1	1	1	2	2	1
695	1	1	1	1	1	2	1	1	1	1	1	1	1	1	1	1	1	2	1	1	1	2	1	2	2	1	1	1	1	2	1	1	1	2	2	1	2	1
696	1	1	2	1	1	2	2	1	1	1	1	1	1	1	1	1	1	1	1	1	1	1	1	1	1	1	1	1	1	2	1	2	2	1	1	1	1	1
697	1	2	1	1	1	2	2	1	1	1	1	1	1	1	1	1	1	1	2	2	2	1	1	1	2	2	1	1	1	2	1	1	2	1	1	1	2	1
698	1	1	1	1	1	2	2	1	1	1	1	1	1	1	1	1	1	1	1	2	1	1	2	2	2	2	2	1	1	1	1	1	1	1	1	1	1	1
699	1	2	2	1	1	2	2	2	1	1	1	1	1	1	1	1	1	2	1	1	1	2	1	1	2	2	2	2	1	1	1	1	1	1	1	2	2	2
700	1	1	2	1	2	2	2	1	1	1	1	1	1	1	1	1	1	1	1	1	1	1	1	1	1	2	2	1	1	1	1	1	1	1	1	2	2	2
701	1	2	2	1	1	2	2	1	1	2	1	1	1	1	1	1	1	2	1	1	1	2	1	1	2	2	2	1	2	1	1	1	1	1	1	1	2	1
702	1	2	1	1	1	2	2	1	1	1	1	1	1	1	1	1	2	1	2	2	1	1	1	1	1	1	1	1	1	1	1	1	1	2	2	2	2	1
703	1	2	2	1	1	2	1	1	1	1	1	2	1	1	1	1	1	2	1	1	1	1	1	2	2	2	2	1	1	2	2	1	1	1	1	1	1	1
704	1	1	2	1	1	2	1	1	1	1	1	1	1	1	1	1	1	1	1	1	1	2	2	1	2	1	1	1	1	1	1	1	1	1	1	1	1	1
705	1	2	2	1	1	2	2	1	1	1	1	1	1	1	1	1	1	1	1	1	2	2	2	1	2	1	1	1	1	1	1	1	1	1	1	1	1	1
706	1	2	1	1	1	2	2	1	1	1	1	1	1	1	1	1	1	2	1	1	2	2	2	1	1	2	1	1	1	1	1	1	1	1	1	2	2	1
707	1	2	2	1	2	2	2	1	1	1	1	1	1	1	2	1	1	1	2	2	1	1	2	1	2	2	1	2	1	1	1	1	1	1	2	1	2	1
708	1	2	2	1	1	2	2	1	1	1	1	1	1	1	1	1	1	1	1	1	1	1	1	1	2	1	1	1	1	1	1	1	1	1	1	1	1	1
709	1	1	1	1	1	2	1	1	1	1	1	1	1	1	1	1	1	1	1	1	1	1	1	1	2	1	1	1	1	2	1	1	1	1	1	2	2	1
710	1	2	2	1	1	2	2	1	1	1	1	1	1	1	1	1	1	1	1	1	2	1	1	1	2	1	1	1	1	1	1	1	1	2	2	2	2	1
711	1	2	1	1	2	2	2	1	1	1	1	1	1	1	1	1	1	1	1	1	1	1	1	2	1	2	2	1	1	1	1	1	1	1	1	1	1	1
712	1	1	1	1	1	2	2	1	2	1	1	1	1	1	1	1	2	1	2	2	2	2	2	2	2	2	2	1	1	1	2	1	1	1	1	2	2	1
713	1	2	1	1	1	2	2	1	1	1	1	1	1	1	1	1	1	1	2	1	2	1	1	1	1	1	1	1	1	2	1	1	1	1	1	2	2	1
714	1	2	2	1	1	2	2	1	1	1	1	1	1	1	1	1	1	1	2	1	1	1	1	1	2	1	1	1	1	1	2	1	2	1	1	2	2	1
715	1	2	1	1	1	2	2	1	1	1	1	1	1	1	1	1	1	1	1	1	1	1	2	1	1	1	1	1	1	1	1	1	1	1	1	1	1	1
716	1	2	2	1	1	2	2	1	1	1	1	1	1	1	1	1	1	1	1	1	1	1	1	1	2	1	1	1	1	1	1	1	1	1	1	1	1	1
717	1	2	1	1	2	2	2	1	1	1	1	1	1	1	1	1	1	1	1	1	1	1	1	1	2	2	2	1	1	1	1	1	1	1	1	1	1	1
718	1	1	1	1	1	1	1	1	1	1	1	1	1	1	1	1	1	1	1	1	1	1	2	2	2	2	2	1	1	1	1	1	1	1	1	1	1	1
719	1	2	2	1	1	2	2	1	2	1	1	1	1	1	1	1	1	2	1	1	2	2	2	1	2	2	2	1	1	1	1	1	1	1	1	1	1	1
720	1	1	1	1	1	2	2	1	1	1	1	1	1	1	1	1	1	2	1	1	1	2	2	1	1	2	1	1	1	2	2	1	1	1	2	1	1	1
721	1	1	2	1	1	2	2	1	1	1	1	1	1	1	1	1	1	1	1	1	1	1	2	2	2	1	1	1	1	1	1	1	1	1	1	1	1	1
722	1	1	2	1	2	2	2	1	1	1	1	1	1	1	1	1	1	2	2	1	1	2	2	2	2	1	1	1	1	1	1	1	1	1	1	1	1	1
723	1	2	2	1	1	2	2	2	1	1	1	1	1	1	1	1	1	2	1	1	2	1	1	2	2	1	1	1	1	1	1	1	1	1	1	2	2	1
724	1	2	1	1	1	2	2	1	2	1	1	1	1	1	1	1	1	2	1	1	2	2	1	1	1	2	1	1	1	1	1	1	1	1	1	2	2	2
725	1	1	1	1	1	2	2	1	1	1	1	1	1	1	1	1	1	1	1	1	1	1	1	1	2	1	1	1	1	2	1	1	1	1	1	1	1	1
726	1	1	1	1	2	2	1	1	1	1	1	1	1	1	1	1	1	1	1	1	1	1	1	1	2	1	1	1	1	1	1	1	1	1	1	1	1	1
727	1	2	1	1	1	2	2	1	1	1	1	1	1	1	1	1	1	1	2	2	2	1	1	1	1	1	1	1	1	2	2	1	1	1	1	1	2	1
728	1	2	2	1	1	2	2	1	1	1	1	1	1	1	1	1	1	1	2	2	1	1	1	1	2	1	1	1	1	1	1	1	1	2	1	1	2	1
729	1	1	2	1	1	2	1	1	1	1	1	1	1	1	1	1	1	1	1	1	1	2	2	1	1	2	2	1	1	1	1	1	1	1	1	1	1	1
730	1	2	2	1	1	2	2	1	1	1	2	2	1	1	1	1	1	1	2	2	2	1	2	2	2	2	2	2	1	1	1	1	1	1	2	2	2	2
731	1	1	2	1	2	2	2	1	1	1	1	1	1	1	1	1	1	1	1	2	1	1	1	2	2	1	1	1	1	1	1	1	1	1	1	1	1	1
732	1	1	2	1	2	1	1	1	1	1	1	1	1	1	1	1	1	1	1	1	1	1	1	1	2	2	2	1	1	1	1	1	1	1	1	1	1	1
733	1	1	2	1	2	1	1	1	1	1	1	1	1	1	1	1	1	1	2	1	1	1	1	1	1	2	2	1	1	1	1	1	2	1	1	1	2	1
734	2	2	2	1	1	1	1	1	1	1	1	1	1	2	1	1	2	1	1	2	1	1	1	1	2	2	2	1	1	1	1	1	1	1	1	1	1	1
735	1	1	2	1	1	2	2	1	1	2	1	1	1	1	1	1	1	1	2	1	2	1	2	2	2	2	2	2	2	1	1	2	2	1	2	1	2	2
736	1	1	1	1	1	2	2	1	1	1	1	1	1	1	1	1	1	2	1	2	2	2	2	1	2	2	2	1	1	2	1	1	1	2	2	1	1	1
737	2	2	1	2	1	1	1	2	1	1	1	2	1	1	1	1	1	2	1	1	2	2	2	1	2	2	2	2	1	2	1	1	1	2	1	2	2	1
738	1	1	1	1	1	2	2	1	1	1	1	1	1	1	1	1	1	2	1	1	1	2	1	1	1	2	1	1	1	2	1	1	1	1	1	1	2	1
739	1	1	2	1	2	2	2	1	1	1	1	1	1	1	1	1	1	1	2	1	1	1	1	1	2	2	2	1	1	1	1	1	1	1	1	1	2	1
740	1	2	1	2	1	2	2	1	1	1	1	2	1	1	1	1	2	1	1	1	1	1	2	2	2	2	2	2	1	1	1	1	1	1	1	1	2	2
741	1	1	2	1	1	2	1	1	1	1	1	1	1	1	1	1	1	1	1	1	1	1	1	1	1	1	1	1	1	1	1	1	1	1	1	1	1	1
742	2	2	2	2	1	2	2	1	1	2	1	2	1	1	1	1	1	2	2	2	2	2	2	2	2	2	2	1	2	2	2	2	2	2	2	2	2	1
743	1	2	1	1	1	2	2	1	1	1	1	1	1	1	1	1	1	1	1	2	2	2	1	1	2	2	2	1	1	1	1	2	1	1	1	1	2	2
744	1	2	1	1	1	2	2	1	1	1	1	1	1	1	1	1	1	2	1	1	1	2	2	2	2	2	2	1	1	1	1	1	1	1	1	1	1	1
745	1	1	2	1	1	2	2	1	1	1	1	1	1	1	1	1	1	1	2	2	1	1	2	1	1	2	1	1	1	1	2	2	1	1	1	1	1	1
746	1	2	2	1	1	1	1	1	1	1	1	1	1	1	1	1	2	2	2	2	2	2	2	1	2	2	2	1	1	1	1	1	1	1	1	2	2	1
747	1	2	1	1	1	2	2	1	1	1	1	1	1	1	1	1	2	1	1	1	1	2	2	1	1	1	1	1	1	1	1	1	1	1	1	1	2	1
748	1	2	2	1	1	2	2	1	1	2	1	1	1	1	1	1	1	1	1	1	1	1	1	1	1	1	1	1	1	1	1	1	1	1	2	1	2	1
749	1	1	1	1	2	2	2	1	1	1	1	1	1	1	1	1	1	1	1	1	1	1	1	1	1	2	1	1	1	1	2	1	1	1	1	2	2	1
750	1	2	2	1	1	2	1	1	1	1	1	1	1	1	1	1	1	1	1	1	2	1	1	2	2	2	2	1	1	1	1	1	1	2	2	1	2	2
751	1	1	2	1	1	2	2	1	1	1	1	1	1	1	1	1	1	1	1	1	1	1	2	1	2	2	2	1	1	2	2	1	1	2	2	1	1	1
752	1	2	1	1	2	1	1	1	1	1	1	1	1	1	1	1	1	1	1	1	1	1	1	1	1	1	1	1	1	1	1	1	1	1	1	1	1	1
753	1	1	1	1	1	2	2	1	1	1	1	1	1	1	1	1	1	1	1	1	1	1	1	1	1	1	1	1	1	2	1	1	1	1	1	1	2	1
754	1	2	2	1	2	2	1	1	1	1	1	1	1	1	1	1	1	1	1	1	1	1	1	1	2	2	1	1	1	1	1	1	2	1	1	2	2	1
755	1	2	1	1	1	2	2	1	1	1	1	2	1	1	1	1	1	2	2	2	2	2	2	2	2	2	2	2	1	1	2	1	1	1	2	1	2	1
756	1	1	2	1	1	2	2	1	1	1	1	1	1	1	1	1	1	2	1	1	1	1	1	2	2	2	2	1	1	1	2	1	1	2	2	2	2	1
757	1	2	2	1	1	2	1	1	1	1	1	1	1	1	1	1	1	2	1	1	1	1	1	1	1	2	2	1	1	1	1	2	2	1	1	2	2	2
758	1	2	2	1	2	2	2	1	1	1	1	1	1	1	1	1	1	1	1	1	1	1	1	2	2	2	2	1	1	1	1	1	1	1	1	2	2	1
759	1	2	2	1	2	2	1	1	1	1	1	1	1	1	1	1	1	1	1	1	2	1	1	1	1	2	2	1	1	1	1	1	1	1	1	1	1	1
760	1	2	1	1	1	2	1	1	2	1	1	1	1	1	1	1	2	2	1	2	1	2	1	2	2	2	1	1	1	1	1	1	2	1	1	1	2	1
761	2	2	1	1	1	2	1	2	1	2	1	2	1	1	1	1	2	1	1	1	1	1	1	1	1	2	2	2	1	2	1	1	1	1	1	2	2	1
762	1	1	1	1	1	1	1	1	1	1	1	1	1	1	1	1	1	1	2	2	1	1	1	1	1	1	1	1	1	1	1	1	1	1	1	1	1	1
763	1	2	2	1	1	2	2	1	1	2	1	2	1	1	2	1	1	1	2	2	2	1	2	2	2	1	1	1	2	1	2	1	1	1	1	2	2	2
764	2	2	2	2	1	2	2	1	1	2	2	2	1	1	1	1	1	2	2	2	1	2	2	2	2	2	2	2	2	1	1	1	1	1	1	2	2	2
765	1	1	2	1	1	2	2	1	1	1	1	1	1	1	1	1	2	2	1	2	2	2	1	1	1	1	1	1	1	1	1	1	1	1	1	1	2	1
766	1	2	2	1	1	2	2	2	2	1	1	1	1	1	1	1	1	1	1	1	1	2	2	2	2	1	1	1	1	1	2	1	1	1	1	1	2	1
767	1	1	1	1	1	1	1	1	1	1	1	1	1	1	1	1	1	2	1	2	1	1	1	2	2	1	1	1	1	1	1	1	1	1	1	1	1	1
768	1	2	1	1	1	1	1	1	1	1	1	1	1	2	1	1	2	2	2	2	2	2	1	2	2	2	1	2	1	1	1	2	2	1	1	1	2	2
769	1	2	2	1	1	2	2	1	1	1	1	1	1	1	1	1	2	1	1	1	1	1	1	1	2	2	2	2	1	2	1	1	2	2	2	2	2	2
770	1	2	1	1	1	2	2	1	1	1	1	2	1	1	1	1	1	1	2	2	1	1	2	2	2	2	1	1	1	2	2	1	1	2	1	1	2	1
771	1	1	2	1	1	1	1	1	1	1	1	1	1	1	1	1	1	1	1	1	1	1	1	2	2	1	1	1	1	1	1	1	1	1	1	1	1	1
772	2	2	2	2	1	2	2	1	1	1	1	2	1	1	1	1	2	1	1	1	2	1	2	2	2	2	2	2	1	2	1	1	2	1	2	2	2	2
773	2	2	2	2	1	1	1	1	1	1	1	1	1	2	1	1	1	2	2	2	2	2	2	2	2	2	2	1	1	2	2	1	1	1	2	2	2	2
774	1	2	1	1	1	2	2	1	1	1	1	1	2	1	1	1	1	1	1	1	1	1	1	2	2	2	2	1	1	2	1	1	2	2	1	2	2	2
775	1	2	2	1	1	2	2	2	1	2	1	2	1	1	2	1	1	1	1	1	1	1	2	2	2	2	2	2	1	1	1	1	2	1	2	2	2	1
776	2	2	2	1	1	2	1	1	1	1	1	1	1	1	1	1	1	1	2	1	1	1	2	2	2	2	2	2	1	1	2	1	1	2	2	2	2	2
777	1	2	1	1	1	2	2	1	1	1	1	1	1	1	1	1	2	2	2	2	1	1	1	2	2	1	2	1	1	1	1	1	1	1	1	2	2	2
778	1	1	2	1	1	1	1	1	1	1	1	1	1	1	1	1	1	1	1	1	1	1	1	1	1	1	1	1	1	1	1	1	1	1	1	1	1	1
779	1	1	1	1	2	2	2	1	2	1	1	1	1	1	1	1	1	1	2	2	1	1	1	1	1	1	1	1	1	2	1	1	1	1	1	2	2	1
780	2	2	2	2	1	2	2	1	1	2	1	2	1	2	1	1	1	1	1	1	1	1	2	2	2	2	2	2	2	1	1	1	2	2	1	2	2	2
781	1	1	1	1	1	2	2	1	2	1	1	1	1	1	2	1	1	2	2	2	1	2	1	2	2	2	1	1	1	1	2	1	1	2	1	2	2	1
782	1	2	2	1	2	2	2	1	2	2	1	1	1	1	1	1	1	1	1	1	1	1	1	2	2	2	2	1	2	1	1	1	1	1	1	2	2	2
783	1	2	1	1	1	2	2	1	1	2	1	1	1	1	1	1	1	1	2	2	1	1	1	2	2	2	1	2	1	1	1	1	1	1	1	1	2	2
784	1	2	2	1	2	2	2	1	2	2	1	1	1	1	1	1	1	1	2	2	1	1	1	1	2	2	2	1	2	1	1	1	2	2	2	1	2	1
785	2	2	2	2	1	2	2	2	1	1	1	2	1	1	1	1	1	2	1	2	1	2	2	2	2	2	2	2	2	2	1	2	2	2	2	2	2	2
786	1	1	2	1	1	2	2	1	1	1	1	1	1	1	1	1	1	2	2	2	2	2	1	2	2	2	2	2	1	2	1	1	2	1	1	2	2	1
787	1	2	2	1	1	2	2	1	1	1	1	2	1	1	1	1	1	1	1	2	1	2	2	2	2	2	2	2	1	1	1	2	2	2	1	2	2	2
788	1	2	2	1	1	2	2	1	1	2	1	2	1	1	1	1	2	2	2	2	1	2	2	2	2	2	2	1	2	1	2	1	1	1	1	2	2	2
789	1	2	2	2	1	2	2	1	1	1	2	2	2	1	1	1	1	1	2	1	1	1	2	2	2	2	2	2	2	1	1	1	1	1	1	2	2	2
790	2	2	2	2	1	1	1	1	1	1	2	2	1	2	1	1	1	2	1	1	2	2	2	2	2	2	2	2	2	2	1	1	2	2	2	2	2	2
791	2	2	2	1	1	2	2	1	1	1	1	1	1	1	1	1	1	1	1	1	1	2	2	2	2	2	2	2	2	1	1	2	2	2	2	2	2	2
792	1	1	1	1	1	2	2	1	1	1	2	2	1	1	1	1	1	2	2	2	1	2	2	1	2	1	1	2	2	2	1	1	1	2	1	2	2	2
793	1	1	1	2	1	2	1	1	1	1	1	1	1	1	1	1	1	1	1	1	1	1	1	1	2	2	2	1	1	1	1	1	1	1	1	1	1	1
794	2	2	2	2	1	2	2	1	1	2	1	2	1	1	1	1	1	2	1	1	2	2	2	2	2	2	2	2	2	1	1	1	1	2	2	2	2	2
795	1	2	2	1	1	2	2	1	1	2	1	1	1	1	1	1	1	1	1	1	1	1	1	2	2	2	2	1	2	1	1	1	1	1	1	1	2	1
796	1	1	2	1	2	2	2	1	1	1	1	1	1	1	1	1	1	1	1	1	1	1	2	1	1	1	1	1	1	1	2	1	2	1	1	1	2	1
797	1	2	1	1	1	2	2	1	1	2	1	1	1	1	1	1	1	1	1	2	1	1	1	1	2	2	2	1	1	2	1	1	2	2	2	1	1	1
798	1	1	1	1	2	2	2	1	2	2	1	1	1	1	1	1	1	1	1	1	1	1	1	2	2	1	1	1	1	1	1	1	1	1	1	1	1	1
799	1	1	1	1	2	2	2	1	2	1	1	1	1	1	1	1	1	1	1	1	1	1	1	1	2	2	1	1	1	1	1	1	1	1	1	1	1	1
800	1	2	2	1	1	2	2	1	2	1	1	1	1	1	2	1	1	1	2	2	1	1	2	2	2	1	1	1	2	2	1	1	1	2	2	2	2	2
801	1	2	1	1	1	1	1	1	1	1	1	1	1	1	1	1	2	1	2	1	1	1	2	1	1	1	1	1	1	2	1	1	1	1	1	2	2	1
802	2	2	2	2	1	1	1	1	1	2	1	2	1	1	1	1	1	2	1	2	1	2	2	2	2	2	2	2	2	2	2	1	1	2	2	1	2	1
803	1	2	2	1	2	2	2	1	1	2	1	2	1	1	1	1	1	1	1	1	1	1	2	2	2	1	1	2	1	1	2	1	2	2	2	1	2	2
804	1	1	1	1	1	2	2	1	1	2	1	1	1	1	1	1	1	2	1	1	1	2	2	1	2	1	1	1	1	1	1	1	2	1	1	1	2	1
805	1	1	2	2	1	1	1	1	1	1	1	2	1	1	2	1	1	2	2	2	1	2	2	2	2	2	2	1	2	2	2	1	1	2	2	2	2	2
806	1	2	1	1	2	2	2	1	1	2	2	1	1	1	1	1	1	1	1	1	1	1	1	1	2	2	2	1	1	2	1	1	1	1	1	1	2	1
807	1	2	2	1	1	2	2	1	2	1	1	1	1	1	1	1	1	2	1	1	1	2	1	2	2	2	2	1	1	1	1	1	1	2	1	1	2	1
808	1	2	2	1	1	2	2	1	1	1	1	1	1	1	1	1	1	2	1	1	1	2	1	2	2	2	2	1	1	1	1	1	1	2	1	1	2	1
809	1	1	2	1	1	1	1	1	1	1	1	1	1	1	1	1	1	1	1	1	1	1	2	2	2	1	1	2	2	2	1	1	2	1	1	2	2	2
810	1	2	1	1	1	2	2	1	1	2	1	1	1	1	1	1	1	1	2	2	1	1	2	2	2	1	1	2	1	2	2	1	1	1	2	1	2	1
811	1	2	2	1	1	2	2	1	1	1	1	1	1	1	1	1	1	1	1	1	1	1	2	1	2	1	1	1	2	1	1	1	1	1	1	2	2	2
812	1	2	2	2	1	2	2	1	1	2	2	2	1	1	1	1	2	2	1	1	1	2	2	2	2	2	2	2	2	1	1	1	1	1	1	2	2	2
813	1	1	1	1	1	2	2	1	1	1	1	1	1	1	1	1	1	1	1	1	1	1	1	1	1	2	2	1	1	2	1	1	2	1	1	2	2	1
814	1	2	2	2	1	2	2	1	1	1	2	2	1	2	1	1	1	2	1	1	2	2	2	2	2	2	2	2	2	1	1	1	1	2	2	1	1	1
815	1	2	1	1	1	2	2	1	1	2	1	1	1	1	1	1	1	1	2	1	1	1	1	1	2	2	1	2	1	1	1	1	1	1	1	1	1	1
816	1	2	2	1	1	2	2	1	1	2	1	2	2	1	1	1	2	1	1	1	1	2	2	2	2	2	2	2	2	2	2	1	1	2	2	1	2	1
817	1	2	2	1	1	2	2	1	1	2	1	1	2	1	1	1	1	1	2	2	1	1	2	2	2	2	2	2	2	2	1	1	1	1	2	1	2	2
818	1	2	2	1	1	2	2	1	1	2	1	1	1	1	2	1	2	1	2	2	1	1	2	2	2	2	2	1	1	1	1	1	1	1	2	1	2	2
819	1	2	2	1	1	2	1	1	1	2	1	1	1	1	1	1	1	1	1	2	1	1	2	2	2	2	2	1	2	1	2	1	1	1	1	1	2	2
820	1	2	1	1	1	2	2	1	1	1	1	1	1	1	1	1	2	1	2	1	1	1	1	1	1	1	1	1	2	2	1	1	1	1	1	1	2	1
821	1	2	2	1	1	2	2	1	1	2	1	2	1	1	1	1	1	1	1	1	2	1	1	2	2	2	2	2	2	2	1	1	2	1	1	2	2	2
822	2	1	1	2	1	1	1	1	1	1	1	2	1	1	1	1	1	2	2	1	2	2	2	2	2	2	2	2	2	2	2	2	2	2	2	2	2	2
823	2	2	2	2	1	2	2	1	2	2	1	2	1	1	2	1	2	1	1	2	1	1	2	2	2	1	1	2	2	1	1	1	1	2	2	2	2	2
824	1	1	2	1	1	2	1	1	1	1	1	1	1	1	1	1	1	2	1	1	1	1	1	1	1	1	1	1	1	1	1	1	1	1	1	1	1	1
825	1	2	2	1	1	2	2	1	1	2	1	2	1	1	1	1	2	2	1	1	1	2	2	2	2	2	2	2	2	1	1	1	1	2	2	2	2	2
826	1	2	2	1	1	2	2	1	1	2	1	1	1	1	1	1	1	1	1	2	1	1	1	1	2	2	2	1	2	1	1	1	1	1	1	1	2	2
827	2	2	1	2	1	2	2	2	1	1	1	2	2	1	1	1	1	2	1	1	1	2	2	2	2	2	2	2	2	2	1	1	2	1	2	2	2	2
828	1	2	1	1	1	2	2	1	1	1	1	1	1	1	1	1	1	2	1	2	1	2	2	1	1	2	1	2	1	1	1	1	1	1	1	2	2	1
829	2	2	1	2	1	2	2	1	1	2	2	2	1	1	1	1	1	2	1	1	1	2	2	1	1	2	2	2	2	1	1	1	1	2	2	1	2	2
830	1	2	1	1	1	2	1	1	1	1	1	1	1	1	1	1	1	1	1	1	1	1	2	2	2	2	2	2	1	1	1	1	2	2	1	2	2	1
831	1	2	2	1	1	2	2	2	1	1	1	2	1	1	2	1	2	2	2	2	1	1	2	2	2	2	2	2	2	2	2	1	2	1	1	2	2	1
832	1	2	2	1	1	2	2	2	1	2	1	2	1	1	1	1	1	2	1	1	1	2	2	1	2	2	2	2	2	1	1	2	2	1	2	2	2	2
833	1	2	2	1	1	2	2	1	1	1	1	1	1	1	1	1	2	1	2	2	1	1	1	1	2	1	1	1	1	1	1	1	2	2	2	1	1	1
834	1	2	2	1	1	2	2	1	2	1	1	1	1	1	1	1	1	1	2	2	1	1	2	1	2	1	1	1	2	1	1	1	1	1	1	2	2	2
835	1	2	2	1	1	2	2	1	1	2	1	1	1	1	1	1	1	2	2	2	1	2	2	1	2	2	2	1	2	1	1	1	2	1	1	2	2	2
836	1	2	2	1	1	2	2	1	1	2	1	1	1	1	1	1	2	2	1	1	1	1	1	1	1	2	1	1	1	2	1	1	1	1	1	2	2	1
837	1	2	1	1	1	2	2	1	1	1	1	1	1	1	1	1	2	2	1	1	2	2	2	1	1	1	1	1	2	2	1	1	1	1	1	2	2	1
838	1	2	2	1	1	2	2	1	1	2	1	1	1	1	1	1	1	2	2	2	2	1	2	1	2	2	2	1	2	2	1	1	1	2	2	2	2	1
839	1	2	2	1	2	2	2	1	1	2	1	2	1	1	1	1	2	2	2	2	2	2	2	1	2	2	2	2	2	2	1	1	1	2	2	1	2	1
840	1	2	1	1	1	2	2	1	1	2	1	1	1	1	1	1	1	1	2	2	1	1	2	2	2	2	2	2	1	2	1	1	2	2	2	1	2	2
841	1	2	1	1	1	1	1	2	1	2	1	1	1	1	1	1	2	1	1	1	1	1	1	1	1	2	1	1	1	2	1	1	1	1	1	1	2	1
842	1	2	1	1	1	2	2	1	1	2	1	2	1	1	2	1	1	2	1	2	1	2	1	1	2	1	1	2	1	2	1	1	1	2	2	1	1	1
843	1	2	2	2	1	2	2	2	1	2	2	2	1	1	2	1	1	1	1	1	2	1	2	2	2	2	2	2	2	1	1	2	2	1	1	1	2	2
844	1	2	2	1	1	2	2	1	1	2	1	1	1	1	2	1	1	1	2	2	1	1	1	1	2	2	2	2	2	2	2	1	1	2	2	1	2	2
845	1	2	2	1	1	2	2	2	1	2	1	1	1	1	1	1	1	2	2	2	1	2	2	1	2	2	2	2	2	1	1	1	1	1	1	2	2	1
846	1	2	2	1	1	2	2	2	1	2	1	1	1	1	1	1	1	1	2	2	1	1	1	2	2	2	2	2	2	1	1	1	1	1	2	1	2	1
847	1	2	2	2	1	2	2	1	1	2	1	2	1	2	1	1	2	1	2	1	1	1	1	2	2	2	2	2	2	1	1	1	2	1	2	2	2	2
848	1	2	2	1	1	2	2	1	1	1	1	2	1	1	1	1	2	2	1	1	2	2	2	2	2	2	2	2	2	1	1	1	2	1	2	2	2	2
849	1	2	2	1	1	2	2	1	1	1	1	1	1	1	2	1	1	1	1	1	1	1	1	1	1	1	1	1	1	1	1	1	1	1	2	1	2	1
850	1	2	2	1	1	2	2	1	1	2	2	2	1	2	1	1	2	2	2	2	2	2	2	2	2	2	1	2	1	2	1	2	2	2	2	2	2	1
851	1	2	2	1	1	2	1	1	1	1	1	1	1	1	1	1	2	1	1	1	1	1	2	2	2	2	2	1	2	1	1	1	1	2	2	1	2	2
852	1	2	2	2	1	2	2	1	1	2	2	2	2	1	2	1	1	1	2	2	1	2	2	2	2	1	1	2	2	1	1	1	1	2	2	2	2	2
853	2	1	2	2	1	1	1	1	1	1	1	1	1	1	1	1	1	2	2	2	1	2	2	2	2	2	2	2	2	2	2	1	1	2	2	2	2	2
854	1	2	1	1	1	2	1	1	1	1	1	1	1	1	1	1	1	2	2	2	1	2	2	2	1	2	2	1	1	1	1	1	1	1	1	1	2	1
855	1	2	2	1	1	2	2	1	1	2	1	1	1	2	1	1	2	1	1	1	1	1	2	1	2	1	1	1	1	1	1	1	1	1	2	1	2	1
856	2	2	2	2	1	2	2	1	1	2	1	2	1	1	1	1	2	1	2	2	2	1	2	2	2	2	2	2	2	1	1	1	1	2	2	2	2	2
857	1	2	1	1	1	2	2	2	1	2	1	1	1	1	1	1	2	2	1	1	2	2	2	1	2	2	2	1	1	2	1	1	1	1	2	1	2	2
858	1	2	1	1	1	2	2	1	1	1	1	2	1	1	1	1	1	1	1	1	1	1	1	1	2	2	2	1	1	1	1	1	1	2	2	1	2	2
859	1	2	2	1	1	2	2	1	1	1	1	1	1	1	1	1	1	1	2	2	1	1	1	1	2	1	1	2	2	2	2	1	2	1	2	2	2	2
860	1	2	2	1	1	2	1	1	1	1	1	1	1	1	1	1	1	1	1	2	1	1	2	2	2	2	2	1	2	1	1	1	1	1	2	2	2	2
861	1	2	1	1	1	2	2	1	1	2	1	2	2	1	2	1	1	2	2	2	1	2	2	2	2	2	2	2	1	2	1	1	1	2	2	1	2	2
862	1	2	2	1	1	2	2	1	1	2	1	1	1	1	1	1	2	1	2	2	2	1	1	1	2	2	2	1	1	2	1	1	1	1	2	1	2	1
863	1	2	2	2	1	2	2	1	2	2	1	1	1	1	1	1	1	2	1	1	1	2	2	2	2	2	2	2	1	2	2	1	1	1	2	2	2	2
864	1	2	1	1	1	2	2	2	1	1	1	1	1	1	1	1	1	1	2	2	2	2	2	1	2	1	1	1	1	1	1	1	2	1	2	1	2	1
865	1	2	2	1	1	2	2	1	1	2	1	1	1	1	2	1	1	1	2	1	1	1	2	2	2	1	1	1	1	1	1	1	1	1	1	1	1	1
866	1	2	2	1	1	2	2	2	2	2	1	1	1	1	2	1	1	1	1	1	1	1	2	2	2	2	1	2	1	2	2	1	1	1	2	2	2	2
867	1	2	2	1	1	2	2	1	1	2	1	1	1	1	1	1	1	2	2	2	1	1	1	1	1	1	1	1	1	1	1	1	1	1	1	2	2	1
868	1	1	1	1	1	2	2	1	1	1	1	1	1	1	1	1	1	1	1	1	1	1	2	1	1	1	1	1	1	2	1	1	2	1	1	2	2	1
869	2	2	1	1	1	2	2	1	1	2	1	1	1	1	1	1	2	2	2	2	2	2	2	1	2	2	2	2	1	1	2	1	2	1	1	2	2	1
870	1	2	2	1	1	2	2	1	1	2	1	1	1	1	1	1	1	1	1	1	2	1	1	1	2	1	1	2	1	1	1	2	1	1	2	1	2	2
871	1	2	2	1	1	2	2	1	1	2	1	2	1	1	1	1	1	2	1	1	1	2	2	2	2	2	2	2	2	2	2	1	1	1	2	2	2	2
872	1	1	2	1	1	2	2	2	1	2	1	1	1	1	1	1	1	1	1	1	1	1	1	1	2	1	1	1	1	1	1	1	1	1	2	1	2	1
873	2	2	2	2	1	2	2	1	1	2	1	2	1	2	2	1	1	2	2	2	2	2	2	1	2	2	2	2	2	1	1	2	2	1	2	2	2	2
874	1	1	2	1	1	2	2	1	1	1	1	1	1	1	1	1	1	1	1	1	2	1	2	1	2	2	2	1	2	1	1	1	1	1	1	2	2	1
875	2	2	2	2	1	2	2	1	1	2	1	2	1	1	2	1	1	1	2	2	1	1	2	2	2	2	2	1	2	1	1	1	1	2	2	1	2	2
876	1	2	1	1	1	2	2	2	1	1	1	1	1	1	1	1	1	2	1	1	2	1	1	1	1	2	1	1	1	2	1	1	1	2	2	2	2	2
877	1	2	2	1	1	2	1	1	1	2	1	2	1	1	1	1	2	2	2	2	1	2	2	2	2	2	2	2	1	2	2	1	1	2	2	2	2	1
878	1	2	2	1	1	2	2	1	1	2	1	1	1	1	1	1	1	1	2	2	1	1	1	1	2	2	2	2	1	1	1	1	1	1	1	2	2	1
879	1	2	2	1	1	2	2	1	1	1	1	1	1	1	1	1	2	1	2	1	1	1	2	1	2	2	2	2	2	1	1	1	1	1	1	1	2	2
880	2	2	2	2	1	2	2	2	1	2	1	2	1	1	1	1	1	1	1	1	1	1	2	2	2	2	2	2	2	2	2	1	1	2	2	1	2	2
881	1	2	1	1	1	2	2	1	1	2	1	1	1	1	1	1	1	1	1	1	1	1	1	1	1	1	1	1	2	2	1	1	1	1	2	1	2	1
882	1	2	2	1	1	2	2	1	1	2	1	2	1	1	1	1	1	2	1	1	1	2	2	1	2	2	2	2	2	2	2	1	1	1	2	2	2	1
883	1	1	2	1	1	2	2	1	1	2	1	2	1	1	2	1	1	2	2	2	1	2	2	1	2	1	1	2	1	1	2	1	1	2	2	1	1	1
884	1	2	2	1	1	2	2	1	1	2	1	1	1	1	1	1	1	1	1	1	1	1	2	2	2	1	1	1	2	1	1	1	1	1	2	1	2	1
885	2	2	1	2	1	2	2	1	1	1	1	2	2	1	1	1	1	1	1	1	2	1	2	2	2	2	2	2	2	2	2	1	2	2	2	1	2	2
886	1	1	2	1	2	2	2	1	1	2	1	1	1	1	1	1	2	1	1	1	1	1	1	1	1	1	1	1	1	1	1	1	1	1	1	1	2	1
887	2	2	1	1	1	2	2	2	1	2	1	2	1	1	1	1	1	1	1	1	1	1	2	2	2	2	2	2	2	1	2	2	2	2	2	2	2	2
888	2	2	1	2	1	2	2	2	1	1	1	2	1	1	1	1	1	2	1	1	1	2	2	2	2	2	2	2	2	2	2	1	1	1	2	2	2	2
889	1	2	2	2	1	2	2	1	1	1	1	2	1	2	2	1	1	2	1	2	2	2	2	2	2	2	2	2	1	2	1	1	1	2	2	2	2	2
890	1	2	2	1	1	2	2	1	1	2	1	1	1	1	1	1	1	2	2	2	1	2	1	1	2	1	1	1	1	1	1	2	1	1	2	1	2	1
891	2	2	1	2	1	2	2	1	1	2	1	2	1	1	2	1	2	1	2	2	1	1	1	1	2	1	1	2	1	2	1	1	1	2	2	2	2	1
892	1	2	1	1	1	2	2	2	2	2	1	1	1	1	1	1	1	1	1	1	1	1	2	1	1	2	2	2	1	2	2	1	1	1	2	2	2	1
893	1	2	2	1	1	2	2	1	1	2	1	1	1	1	1	1	1	1	2	1	1	1	2	2	2	2	2	2	2	2	1	2	2	2	2	2	2	2
894	2	2	1	2	1	1	1	1	1	2	2	2	2	1	2	1	2	1	2	2	1	1	2	2	2	2	2	2	2	2	2	1	1	1	1	2	2	2
895	1	2	1	1	1	2	2	2	1	2	1	1	1	1	1	1	1	1	1	1	1	1	2	1	1	2	2	1	1	2	1	1	1	1	2	1	1	1
896	1	2	2	1	1	2	2	1	1	1	1	1	1	1	1	1	1	2	2	2	2	2	2	2	2	2	2	1	1	1	1	1	1	2	2	1	2	2
897	1	1	1	1	1	2	2	2	1	1	2	1	1	1	1	1	1	1	2	2	1	1	1	1	1	2	2	1	1	2	1	2	2	1	1	1	1	1
898	1	2	2	1	1	2	2	1	1	2	1	1	1	1	1	1	1	1	1	1	2	1	1	1	2	1	1	2	2	2	1	1	1	1	2	1	2	1
899	1	2	2	1	1	2	2	1	1	2	1	2	1	1	2	1	1	1	2	2	1	1	2	2	2	2	2	2	2	2	1	1	1	1	1	1	2	2
900	2	2	2	2	1	2	1	1	1	1	1	2	1	1	1	1	1	2	1	1	2	2	2	2	2	2	2	2	1	2	1	2	2	1	2	2	2	2
901	2	2	1	2	1	2	1	2	1	2	1	2	1	1	1	1	2	2	1	2	1	2	2	2	2	2	2	2	1	2	1	1	2	1	2	2	2	1
902	1	2	1	1	1	2	2	1	1	2	1	1	1	1	1	1	1	1	1	1	2	1	1	1	2	1	1	2	1	1	1	1	1	1	2	1	2	2
903	2	2	2	2	1	2	2	2	1	1	1	2	1	1	1	1	1	2	1	1	1	1	2	2	2	2	2	2	2	1	1	1	1	2	2	2	2	2
904	1	2	2	1	1	2	2	2	1	1	1	2	1	2	2	1	2	1	2	2	1	1	1	1	2	2	2	2	2	2	1	1	1	1	1	2	2	1
905	1	2	2	1	1	2	2	1	1	2	1	1	1	1	1	1	1	1	2	2	1	1	2	2	2	2	2	2	2	2	2	1	1	2	2	1	2	2
906	1	2	2	1	1	2	2	1	1	1	1	1	1	1	1	1	1	1	1	1	1	1	1	1	2	2	2	1	2	2	1	1	1	2	2	2	2	2
907	1	2	2	2	1	2	2	2	1	2	1	2	1	1	1	1	1	2	2	1	1	2	2	2	2	2	2	2	1	2	2	1	2	2	2	2	2	2
908	1	2	2	1	1	2	2	1	1	2	1	2	1	1	1	1	1	1	1	1	1	1	2	2	2	2	2	2	2	1	1	1	1	1	2	1	1	1
909	1	2	2	1	1	2	2	1	1	2	1	1	1	1	1	1	1	1	1	1	1	1	1	1	2	1	1	2	2	1	1	2	1	1	2	2	2	2
910	1	1	2	1	1	2	2	1	1	2	1	1	1	1	1	1	1	2	1	2	1	2	2	2	2	2	2	2	1	2	1	1	1	2	2	2	2	2
911	1	2	2	1	1	2	2	1	1	1	1	1	1	1	2	1	1	1	2	2	2	1	1	2	2	1	1	2	2	1	2	1	1	1	2	1	2	1
912	1	2	1	1	2	2	2	2	2	1	1	1	1	1	1	1	2	1	1	1	1	1	1	2	2	1	1	2	1	2	1	1	1	1	1	2	2	2
913	1	2	1	1	1	2	2	1	1	2	1	1	1	1	1	1	1	1	2	2	1	1	1	1	1	2	1	1	1	2	1	1	1	1	1	1	1	1
914	1	2	2	1	2	2	1	1	2	2	1	1	1	1	1	1	2	1	1	1	1	1	1	2	2	2	2	1	1	1	1	2	2	1	1	2	2	2
915	1	2	1	1	1	2	2	2	1	1	1	1	1	1	1	1	1	2	1	2	1	2	1	1	2	2	2	2	2	1	1	1	1	2	2	2	2	1
916	1	2	1	1	1	2	2	1	1	1	1	1	1	1	1	1	2	1	1	1	1	1	1	2	2	2	2	1	1	2	1	1	2	1	2	1	1	1
917	1	2	2	1	1	2	2	1	2	1	1	1	1	2	1	1	2	1	1	1	2	1	2	2	2	2	2	2	1	1	1	1	2	2	2	1	2	2
918	1	2	1	1	1	2	2	1	1	1	1	1	1	1	1	1	1	2	1	1	1	2	1	2	2	2	2	2	1	1	1	1	1	2	1	1	2	1
919	2	2	2	2	1	2	2	1	1	2	1	2	1	1	1	1	1	1	2	2	1	2	2	2	2	2	2	2	2	2	2	1	1	2	2	2	2	2
920	1	2	1	2	1	2	2	1	1	2	1	2	1	1	1	1	2	1	2	2	1	1	2	2	2	2	2	1	1	2	2	1	1	1	2	2	2	2
921	1	2	2	2	1	2	2	2	1	2	1	2	1	1	2	1	1	1	2	2	2	1	2	2	2	2	2	2	2	1	2	1	1	1	2	2	2	2
922	1	2	2	1	1	2	2	1	1	1	1	1	1	1	1	1	2	1	2	2	1	1	2	1	2	1	1	1	1	1	1	1	2	1	1	2	1	1
923	1	1	2	1	1	2	2	1	1	1	1	1	1	1	1	1	1	1	1	2	2	1	1	1	1	1	1	1	1	1	2	1	1	1	1	2	2	1
924	1	2	2	1	1	2	2	1	1	2	1	1	1	1	1	1	1	1	1	1	1	1	1	1	2	1	1	1	1	1	1	1	1	1	2	1	2	2
925	1	1	1	1	1	2	2	2	1	2	1	1	1	1	1	1	1	1	1	1	1	2	2	2	2	2	2	2	2	2	1	1	1	2	2	2	2	2
926	1	1	2	1	1	2	2	1	1	2	1	1	1	1	1	1	1	1	2	1	2	1	2	2	2	2	1	2	2	2	1	1	1	1	2	2	2	2
927	1	2	2	1	1	1	1	1	1	1	1	1	1	1	1	1	1	1	2	2	1	1	2	2	2	2	2	2	1	1	1	1	1	1	1	1	1	1
928	1	2	1	2	1	2	2	1	1	2	1	1	1	1	1	1	1	2	1	1	1	2	2	2	2	1	1	2	1	1	1	1	2	1	1	2	2	2
929	1	1	2	1	1	2	2	1	1	2	1	1	1	1	1	1	1	2	2	2	2	2	2	2	2	2	2	2	1	2	2	1	2	1	1	1	2	1
930	1	2	2	1	1	2	2	1	1	2	1	1	1	1	1	1	1	1	1	1	1	1	1	1	2	2	2	2	1	1	1	2	2	1	1	1	2	2
931	1	2	2	2	1	2	2	1	1	2	1	1	1	1	1	1	1	2	2	1	1	2	2	2	2	2	2	2	2	1	2	2	1	1	2	2	2	2
932	2	2	2	2	1	2	2	1	2	1	2	1	1	1	1	1	1	2	1	1	2	2	2	2	2	2	2	2	2	1	1	2	2	2	2	1	2	2
933	1	2	2	1	1	2	2	1	1	2	1	1	1	1	1	1	2	1	1	2	1	1	2	2	2	2	1	1	2	1	2	1	1	1	2	1	2	2
934	1	1	2	2	1	2	2	1	1	2	2	2	1	1	1	1	1	1	1	2	1	1	2	2	2	2	2	2	2	2	2	2	2	2	2	1	2	2
935	2	2	2	2	1	2	2	2	1	2	1	2	1	1	1	1	2	2	2	2	2	2	2	2	2	2	2	1	1	1	1	1	1	2	2	2	2	2
936	1	2	2	1	1	2	2	1	1	2	1	1	1	1	1	1	2	2	1	1	1	2	2	2	2	2	2	1	2	1	1	1	1	1	1	2	2	1
937	1	2	1	2	1	2	1	1	1	2	1	2	1	1	1	1	1	1	2	2	2	1	2	2	2	2	2	2	2	1	2	2	1	2	2	2	2	2
938	1	2	2	1	2	2	2	2	2	2	1	1	1	1	1	1	1	2	2	2	2	2	1	2	1	2	1	2	1	1	1	1	1	1	2	2	2	2
939	1	1	2	1	1	2	2	1	1	1	1	1	1	1	1	1	1	2	1	1	1	2	2	2	2	2	2	2	2	2	1	1	1	2	2	1	2	2
940	1	1	2	1	1	2	2	1	1	2	1	1	1	1	1	1	1	2	2	2	2	2	2	1	1	2	1	2	1	1	1	1	1	1	2	2	2	1
941	1	2	2	2	2	2	1	1	1	1	1	2	1	1	1	1	1	2	1	1	1	2	2	2	2	2	2	2	2	1	1	2	2	2	2	1	2	2
942	1	2	2	1	1	2	2	1	1	1	1	1	1	1	1	1	1	2	1	1	1	2	2	2	2	2	2	1	1	2	1	2	1	2	2	1	1	1
943	1	2	2	1	1	2	2	2	1	2	1	1	1	1	1	1	1	1	2	2	2	1	1	1	2	2	2	1	2	1	1	1	1	2	2	2	2	1
944	1	2	2	1	1	2	2	1	1	2	1	1	1	2	1	1	1	1	1	2	1	1	2	2	2	2	2	1	1	1	1	1	1	2	2	1	2	1
945	1	2	2	1	1	2	2	1	1	1	1	1	1	1	1	1	1	2	1	1	2	2	2	2	2	2	2	2	1	2	1	1	2	2	2	1	2	2
946	1	1	2	1	1	2	2	1	1	2	1	1	1	1	2	1	1	1	2	2	1	1	2	2	2	2	2	2	1	1	1	1	1	2	2	2	2	2
947	1	2	2	1	1	2	2	2	1	2	1	1	1	1	1	1	1	2	2	2	2	1	2	2	2	2	2	2	2	1	2	1	1	2	2	1	2	2
948	2	1	2	1	1	2	2	1	1	1	1	2	1	1	1	1	2	2	1	1	1	2	2	2	2	2	2	2	1	1	1	1	1	1	1	1	2	2
949	2	2	2	1	1	2	2	1	1	2	1	2	1	1	2	1	1	2	2	2	1	2	2	2	2	2	2	2	1	2	1	1	1	1	1	2	2	2
950	1	1	1	2	1	2	1	2	1	2	1	2	1	1	2	1	1	2	2	2	1	2	2	2	2	2	2	2	1	2	2	2	2	2	2	2	2	2
951	1	2	2	1	1	2	2	2	1	2	1	2	1	1	2	1	1	1	2	1	2	1	2	1	2	1	1	2	1	2	1	1	1	1	2	2	2	1
952	1	2	1	1	1	2	2	1	1	1	1	1	1	1	2	1	2	1	2	2	1	1	2	1	2	1	1	2	2	1	1	1	2	2	2	2	2	1
953	1	2	2	2	1	2	2	1	1	2	1	2	1	2	2	1	1	2	2	2	2	2	2	2	2	2	2	2	1	2	1	2	2	2	2	2	2	2
954	1	1	2	1	1	2	2	1	1	1	1	1	1	1	1	1	1	1	2	1	1	1	1	1	1	1	1	1	1	2	1	1	2	2	2	1	1	1
955	1	2	2	1	1	2	2	1	1	1	1	1	1	1	1	1	1	1	1	1	1	1	1	1	1	2	2	1	1	2	2	1	1	2	2	2	2	1
956	1	2	1	1	1	2	2	1	1	1	1	1	1	1	1	1	1	1	2	1	1	2	2	1	2	2	1	1	1	1	2	1	1	2	1	2	2	1
957	1	2	2	1	2	2	2	1	1	1	1	1	1	2	2	1	1	1	1	1	1	1	2	2	2	2	1	2	2	2	1	1	2	1	1	1	2	1
958	1	2	1	1	1	2	2	1	1	2	1	1	1	1	1	1	1	1	1	2	1	1	1	2	2	2	2	2	1	1	1	2	1	1	1	2	2	1
959	1	2	2	1	1	2	2	1	1	1	1	1	1	1	1	1	2	1	1	1	2	1	2	2	2	2	2	1	2	1	1	1	1	2	1	1	2	2
960	1	2	2	1	1	2	2	1	1	2	1	1	1	1	1	1	1	1	1	1	2	1	1	2	2	2	2	2	2	1	1	1	1	1	1	2	2	1
961	1	1	2	1	1	2	2	1	1	1	1	1	1	1	1	1	1	2	1	2	2	2	1	2	1	2	2	1	2	1	1	1	1	2	1	2	2	2
962	1	2	1	1	1	2	2	1	1	2	1	1	1	1	1	1	1	2	1	1	1	2	2	2	2	2	2	1	1	2	2	1	2	2	2	2	2	2
963	1	2	2	1	1	2	2	2	1	1	1	1	2	1	2	1	1	1	1	1	1	1	2	2	2	2	2	1	2	2	1	1	1	1	1	1	2	2
964	1	2	1	1	1	2	2	1	1	1	1	1	1	2	1	1	1	1	2	2	1	1	2	2	2	1	1	2	1	1	1	1	1	1	1	1	2	2
965	1	2	2	1	1	1	1	1	1	1	1	1	1	2	2	1	1	1	2	2	1	1	2	2	2	1	1	2	1	2	1	1	2	2	2	2	2	1
966	1	2	2	1	1	2	2	1	1	1	1	1	1	1	1	1	1	1	2	1	2	1	2	1	1	2	2	2	2	1	1	1	1	1	1	1	2	2
967	1	1	2	1	1	2	2	1	1	1	1	1	1	1	2	1	1	2	1	1	2	2	1	2	2	2	2	1	1	2	1	1	1	1	1	1	2	2
968	1	2	1	1	1	2	1	1	1	1	1	1	1	2	1	1	1	2	1	1	2	2	2	1	2	2	1	1	2	2	2	2	2	2	1	2	2	2
969	1	2	1	1	1	2	2	1	1	1	1	1	1	1	1	1	1	1	2	1	1	1	1	1	2	2	2	1	2	2	1	1	1	1	2	1	1	1
970	1	2	2	1	1	2	2	1	1	1	2	1	1	2	1	1	1	1	2	2	1	1	2	2	2	1	1	1	1	1	1	1	1	1	1	1	2	1
971	1	1	2	1	1	2	2	1	1	2	1	1	1	1	1	1	2	1	2	2	2	1	1	1	2	1	1	1	2	2	1	1	2	2	2	2	2	1
972	1	2	2	1	1	2	2	1	1	1	1	1	1	1	1	1	1	1	2	2	2	1	2	2	2	2	2	1	2	2	1	1	1	1	1	1	2	1
973	1	2	1	1	1	2	2	1	1	2	1	1	1	2	1	1	2	1	2	2	1	1	1	1	1	1	1	1	1	1	2	1	2	2	2	1	1	1
974	1	2	1	1	1	2	2	1	1	2	1	1	1	1	1	1	1	2	2	2	1	2	2	1	2	1	1	2	1	1	1	1	1	2	1	2	2	1
975	1	2	2	1	2	2	1	1	1	1	1	1	1	1	1	1	1	1	1	1	1	1	1	1	2	2	2	1	1	1	1	1	1	1	1	2	2	2
976	1	1	1	1	1	2	2	1	1	1	1	1	1	1	1	1	1	2	2	1	1	2	2	2	1	2	1	1	2	1	1	1	1	2	2	2	2	1
977	1	2	2	1	1	2	2	1	1	2	1	1	1	1	1	1	1	1	2	2	1	1	2	2	2	1	1	1	2	1	2	1	2	2	2	2	2	1
978	1	2	1	1	1	2	2	1	1	2	1	1	1	1	1	1	1	1	1	1	1	1	1	1	1	1	1	1	1	1	2	1	1	2	1	1	2	1
979	1	2	1	2	1	2	2	2	1	1	1	2	1	2	1	1	1	1	1	1	1	1	2	2	2	2	2	2	2	1	1	1	1	1	1	2	2	2
980	1	2	2	1	1	2	2	1	1	1	1	1	1	1	2	1	2	2	2	2	1	2	2	1	1	1	1	2	2	1	1	1	1	1	2	2	2	1
981	1	2	2	1	1	2	2	1	2	1	1	1	1	1	1	1	1	2	2	2	2	2	2	1	1	2	1	2	1	2	2	1	2	2	2	2	2	2
982	1	2	1	1	1	2	2	1	1	1	1	1	1	1	1	1	1	1	1	1	1	1	2	1	1	2	2	1	1	1	1	1	1	2	2	1	2	1
983	1	2	2	1	1	2	2	2	1	1	1	1	1	1	1	1	1	1	2	1	1	1	1	1	2	1	1	2	2	1	1	1	1	1	1	2	2	2
984	1	2	1	1	1	2	2	1	1	1	1	1	1	1	1	1	2	2	2	2	1	2	1	2	1	2	2	2	1	2	1	1	1	2	2	2	2	1
985	1	2	1	1	1	2	2	1	1	1	1	1	1	2	1	1	2	1	1	1	1	1	2	2	2	2	2	2	1	2	1	1	1	1	1	1	1	1
986	1	2	2	1	1	2	2	1	1	1	1	1	1	1	1	1	1	2	1	1	2	2	2	1	2	1	1	2	1	2	1	1	2	1	2	2	2	1
987	1	2	2	1	1	2	2	1	1	1	1	1	1	1	1	1	1	1	1	1	1	1	1	1	2	1	1	1	1	2	2	1	1	1	1	2	2	1
988	1	2	2	2	1	2	2	1	2	1	1	1	1	2	1	1	1	2	2	2	1	2	2	2	2	2	2	2	2	1	1	1	1	1	1	2	2	2
989	1	2	2	1	1	2	2	1	1	1	1	1	1	1	1	1	1	2	2	2	2	2	2	2	2	2	2	1	2	1	1	2	1	2	2	1	2	1
990	1	2	2	2	1	2	2	1	1	2	1	1	1	1	1	1	1	2	1	1	2	2	2	2	2	2	2	2	2	2	2	2	2	2	2	2	2	2
991	1	2	1	1	2	2	2	1	1	1	1	1	1	1	1	1	1	1	1	1	1	1	1	1	2	2	2	1	1	2	2	1	1	1	1	1	2	1
992	1	2	1	1	1	2	2	1	1	1	1	1	1	2	2	1	1	1	2	1	2	1	1	2	2	2	2	2	2	2	1	1	1	1	1	2	2	2
993	1	2	2	1	1	2	2	1	2	1	1	1	1	1	1	1	1	1	1	1	2	1	1	1	2	2	2	1	2	1	1	1	1	2	1	2	2	2
994	1	1	1	1	1	2	2	1	1	1	1	1	1	1	1	1	2	1	1	2	1	1	2	2	2	2	2	1	1	2	2	2	2	2	1	1	2	2
995	1	2	1	1	2	2	2	1	1	1	1	1	1	1	1	1	2	1	2	1	1	1	1	1	2	2	1	2	1	2	1	1	1	1	1	2	2	1
996	1	2	1	1	1	2	2	1	2	2	1	2	1	1	2	1	1	1	1	2	1	1	1	1	1	2	2	1	2	2	2	2	2	1	1	2	2	2
997	1	1	2	1	2	2	2	1	1	1	1	1	2	2	2	1	1	1	2	2	1	1	2	1	2	2	2	1	2	2	2	2	2	2	2	1	2	2
998	1	2	2	2	1	2	2	1	1	2	2	1	1	1	2	1	1	2	2	2	2	2	2	2	2	2	2	2	2	1	1	1	1	1	1	1	2	2
999	1	1	1	1	2	2	2	1	2	1	2	1	1	1	1	1	1	2	1	1	1	2	2	1	2	2	2	1	1	2	2	1	1	1	1	1	1	1
1000	1	2	2	1	1	1	1	1	1	1	1	1	1	2	1	1	1	1	1	1	1	1	2	1	2	1	1	1	1	2	2	2	1	2	1	2	2	1
1001	1	2	2	1	1	2	2	2	1	2	1	1	1	1	1	1	1	1	1	2	1	1	2	1	1	1	1	1	1	1	1	1	1	1	1	2	2	1
1002	1	2	1	1	1	2	2	1	1	2	1	1	1	1	1	1	1	1	1	1	1	1	2	2	2	2	2	1	2	2	1	1	1	1	1	2	2	2
1003	1	2	2	1	1	2	2	1	2	2	1	1	1	1	1	1	1	1	1	2	2	1	1	2	2	2	2	1	1	1	1	1	1	1	1	1	2	1
1004	1	2	1	2	1	2	2	1	1	1	2	1	1	1	1	1	1	1	2	2	1	1	1	1	2	1	1	2	1	2	2	1	1	1	1	1	2	1
1005	1	2	1	1	1	2	2	1	1	1	1	1	1	1	1	1	1	1	1	1	1	1	1	1	1	2	2	1	1	2	1	1	1	1	1	2	2	1
1006	1	2	2	2	2	2	2	1	1	1	1	1	1	1	1	1	1	1	2	2	2	1	1	2	2	2	2	1	2	2	2	1	1	2	2	2	2	1
1007	1	2	1	2	1	2	2	1	1	2	1	1	1	1	2	1	2	1	2	2	2	1	2	2	2	1	1	2	2	2	2	1	1	2	2	1	2	2
1008	1	1	2	1	2	2	2	1	2	1	1	1	1	1	2	1	1	1	1	1	1	1	2	2	2	2	2	1	2	1	1	1	1	1	1	1	2	1
1009	1	2	2	1	1	2	2	1	1	1	1	1	1	1	1	1	1	1	1	1	1	1	2	1	2	1	1	1	1	1	1	1	1	1	1	2	2	1
1010	1	2	1	1	1	2	2	1	1	2	2	1	1	1	1	1	2	2	2	1	1	2	2	2	2	2	2	2	2	2	1	1	1	1	2	2	2	2
1011	1	1	2	1	1	2	2	1	1	1	2	1	1	1	1	1	1	1	2	2	1	1	2	2	2	2	1	2	2	2	1	1	1	2	2	2	2	2
1012	1	2	2	1	1	2	2	1	1	2	1	1	1	1	1	1	2	1	1	1	1	1	1	1	1	1	1	1	1	1	1	2	1	2	1	2	2	1
1013	1	2	2	1	1	2	1	2	2	1	1	1	1	1	1	1	1	1	1	1	1	1	1	2	2	1	1	2	2	1	2	1	1	1	1	1	2	2
1014	1	2	2	1	1	2	2	2	1	2	1	1	1	1	1	1	1	1	1	2	1	1	1	2	2	2	2	1	1	1	1	1	1	1	1	1	1	1
1015	1	1	1	1	1	2	2	1	1	1	1	1	1	1	2	1	2	1	2	2	1	1	2	2	2	2	2	1	1	2	1	1	1	2	1	1	2	2
1016	1	2	1	1	1	2	2	1	1	1	1	1	1	1	1	1	1	1	1	1	2	1	1	1	1	2	2	1	1	2	1	1	1	1	1	2	2	1
1017	1	1	1	1	1	2	2	1	1	1	1	1	1	1	1	1	1	1	2	1	1	1	1	1	1	2	2	1	1	2	1	2	2	1	1	1	2	2
1018	1	2	2	1	1	2	2	1	1	2	1	1	1	1	1	1	1	1	1	1	1	1	1	2	2	1	1	1	1	1	1	1	1	2	2	2	2	1
1019	1	2	2	2	1	2	2	1	1	1	2	2	1	1	1	1	1	1	2	2	1	1	1	2	2	2	2	1	1	2	1	2	1	2	2	2	2	2
1020	1	2	1	1	2	2	2	2	1	1	1	1	1	1	1	1	1	1	1	1	2	1	1	1	2	1	1	2	2	2	1	1	1	1	1	2	2	1
1021	1	2	2	1	1	2	2	1	1	1	1	1	1	1	1	1	1	1	1	1	2	1	1	1	1	2	1	1	1	1	1	1	1	1	1	2	2	2
1022	1	2	2	2	1	2	1	1	1	2	2	2	1	1	1	1	1	2	1	2	1	2	2	2	2	2	2	2	1	1	1	1	1	2	2	2	2	2
1023	1	2	2	1	1	2	1	1	1	1	2	1	1	2	2	1	1	2	2	2	1	2	2	1	2	1	1	1	2	2	2	2	1	1	2	1	1	1
1024	1	1	2	1	1	2	2	1	1	1	1	1	1	1	1	1	2	2	1	1	1	2	2	1	1	1	2	1	1	1	1	1	1	2	1	2	2	2
1025	1	2	2	1	1	2	2	1	1	1	1	1	1	1	2	1	2	2	1	1	2	1	2	2	2	2	2	1	2	1	1	1	1	2	2	2	2	2
1026	2	2	2	1	1	2	1	1	1	2	1	1	1	1	1	1	1	1	1	1	1	2	2	2	2	2	2	2	2	2	2	2	2	1	1	1	2	2
1027	1	2	1	1	1	2	2	1	1	1	1	1	1	1	1	1	2	1	2	2	1	1	2	2	2	2	2	2	2	1	1	1	1	1	1	2	2	1
1028	1	1	1	1	2	2	2	1	1	1	1	1	1	1	1	1	1	2	1	1	1	2	2	1	2	1	1	1	2	1	1	1	1	1	1	1	1	1
1029	1	2	1	1	1	2	2	1	1	2	1	1	1	1	1	1	1	2	1	1	1	1	1	2	2	2	2	2	1	1	1	1	1	1	1	1	2	2
1030	1	2	1	1	1	2	2	2	1	2	1	1	1	1	1	1	1	1	1	1	1	1	2	1	2	1	1	2	1	1	1	1	1	1	1	2	1	1
1031	1	2	1	1	2	2	2	2	1	2	1	1	1	1	1	1	1	1	1	1	1	1	2	1	2	2	2	1	1	1	1	1	1	1	1	1	1	2
1032	1	2	1	1	1	2	2	1	1	1	1	1	1	1	1	1	1	2	1	2	2	2	2	2	2	2	2	2	2	1	1	1	1	2	2	1	2	1
1033	1	2	2	2	1	2	2	1	1	2	2	2	1	1	1	2	2	1	1	1	1	1	1	1	2	1	1	2	2	1	1	1	1	2	2	1	1	1
1034	1	1	2	1	2	2	1	1	1	1	1	1	1	1	1	1	1	1	1	2	1	1	1	1	1	1	1	1	2	1	1	1	1	1	1	1	2	1
1035	1	2	1	1	1	2	2	1	1	1	1	1	1	1	1	1	1	1	1	1	1	1	2	1	2	2	2	1	1	2	2	1	1	1	1	2	1	1
1036	1	2	2	1	2	2	2	2	1	1	1	1	1	1	1	1	1	1	1	1	2	1	1	1	2	1	1	1	2	1	1	2	1	2	1	1	2	1
1037	1	2	2	2	1	2	2	2	1	1	2	2	1	1	2	1	1	2	2	2	1	2	2	2	2	2	2	2	1	2	2	2	2	1	1	1	1	1
1038	1	2	1	1	1	2	2	1	1	2	1	2	1	1	1	1	1	1	2	2	1	1	1	2	2	2	2	2	1	2	2	1	1	1	1	2	1	1
1039	1	2	2	2	1	2	2	2	1	2	1	1	1	1	1	1	2	1	1	1	1	1	2	2	2	2	1	2	2	2	2	1	1	1	1	2	1	2
1040	1	2	1	1	1	2	2	1	1	1	1	1	1	1	1	1	2	1	2	1	2	1	1	2	2	2	2	2	2	2	1	1	2	1	1	1	1	1
1041	1	2	1	1	1	2	1	1	1	1	1	1	1	1	1	1	2	1	1	1	1	1	2	2	2	2	2	2	2	2	1	1	1	1	1	2	1	2
1042	1	1	2	1	1	2	2	1	1	1	1	1	1	1	1	1	1	1	2	1	1	1	1	1	2	2	2	1	1	2	1	1	1	1	1	1	2	1
1043	1	1	2	1	1	2	2	1	1	1	1	1	1	1	1	1	2	2	1	1	2	1	2	2	2	2	2	1	2	1	1	1	1	1	1	2	1	2
1044	1	2	2	1	1	2	2	1	1	1	1	1	1	1	1	1	1	1	1	2	1	1	2	2	2	2	2	1	2	1	1	1	1	2	1	1	2	1
1045	1	2	2	2	2	2	1	1	1	2	1	1	1	1	1	1	2	1	1	1	1	1	1	2	2	2	1	2	2	2	1	1	1	2	1	1	1	2
1046	1	2	1	1	1	2	2	1	1	2	1	1	1	1	1	1	1	2	1	1	1	2	1	2	1	2	1	2	2	1	1	1	1	2	2	1	1	2
1047	1	2	1	1	2	2	2	1	1	1	1	2	1	2	1	1	2	2	1	1	1	2	1	2	2	2	2	1	2	2	1	1	1	2	1	1	1	1
1048	1	2	2	1	1	2	2	1	1	2	1	1	2	2	1	1	2	2	2	2	2	2	1	2	2	1	1	1	2	2	1	1	1	2	1	1	1	2
1049	1	2	2	1	1	2	2	1	1	1	1	1	1	1	1	1	1	1	1	1	1	1	1	1	2	2	2	1	2	1	1	1	1	1	1	1	1	1
1050	2	2	2	2	1	2	2	1	1	1	1	2	1	1	1	1	1	2	1	2	1	1	2	2	2	2	2	2	2	1	2	2	1	2	2	2	2	2
1051	1	2	1	1	1	2	2	1	1	1	1	1	1	1	1	1	1	1	1	1	1	1	1	2	2	2	2	1	1	2	1	1	1	1	1	1	1	1
1052	1	2	2	1	1	2	2	1	1	1	1	1	1	2	1	1	1	1	1	1	2	1	1	1	2	1	1	1	1	2	2	1	1	1	1	2	2	1
1053	1	2	2	1	1	2	2	1	1	1	1	1	1	1	1	1	1	1	1	1	1	1	1	1	1	1	1	1	1	1	1	1	1	1	1	1	1	1
1054	1	2	1	1	1	2	2	1	1	1	1	1	1	1	1	1	1	2	1	1	2	2	2	2	2	2	2	2	2	1	1	1	1	1	1	1	1	1
1055	1	1	2	1	2	1	1	2	1	1	1	1	1	1	1	1	2	1	2	2	1	1	2	2	2	1	1	1	2	2	2	1	1	1	1	1	1	1
1056	1	2	1	1	1	2	2	1	1	1	1	1	1	1	2	1	1	1	2	2	1	1	1	2	2	2	1	2	2	1	2	1	1	1	1	1	2	1
1057	1	1	2	1	1	2	2	1	1	1	1	1	1	1	1	1	1	1	1	1	2	2	2	2	2	2	2	1	2	1	1	1	1	2	1	2	2	1
1058	1	1	1	1	1	2	2	1	1	1	1	1	1	1	1	1	2	1	2	2	1	1	2	1	2	1	1	1	1	1	1	1	1	1	1	2	2	1
1059	1	1	2	1	1	2	2	1	1	1	1	1	1	1	1	1	1	2	1	2	1	2	1	2	1	1	1	1	2	2	2	2	1	2	1	1	2	2
1060	1	2	1	1	2	2	2	1	1	1	1	1	1	2	1	1	1	1	2	2	1	1	1	1	1	2	1	1	1	1	1	1	1	1	1	1	2	1
1061	1	2	1	2	1	2	2	1	1	2	1	2	2	1	1	1	1	1	2	2	1	1	2	2	2	2	2	2	1	2	2	1	1	2	2	1	1	1
1062	1	2	1	1	2	2	1	2	1	1	1	1	1	1	1	1	1	2	2	2	1	2	1	2	1	2	2	2	2	1	1	1	1	1	1	1	2	1
1063	1	2	1	1	2	2	1	2	1	1	1	1	1	1	1	1	1	1	1	1	1	2	2	2	2	2	2	2	1	2	1	1	2	2	2	2	2	2
1064	1	2	1	1	1	1	1	1	1	1	1	1	1	2	1	1	1	2	2	2	2	2	2	2	1	2	2	1	1	1	1	1	1	2	2	1	2	1
1065	1	2	1	1	1	2	2	1	2	1	1	1	1	1	1	1	1	2	2	2	1	2	2	1	2	2	2	2	2	1	1	1	2	1	1	2	2	2
1066	1	2	2	1	1	2	1	1	2	1	1	1	1	1	1	1	1	1	1	1	1	1	1	1	2	1	1	1	1	1	1	1	1	2	2	1	2	1
1067	1	2	2	1	1	1	1	1	1	1	1	1	1	1	1	1	1	1	1	1	1	1	1	1	1	1	1	1	1	2	1	1	1	2	1	2	2	2
1068	1	2	2	2	1	2	2	1	1	1	2	2	1	1	2	1	1	1	2	2	2	1	2	2	2	2	2	2	2	2	1	1	2	2	2	1	1	1
1069	1	2	2	1	1	2	2	1	1	1	1	1	1	1	1	1	1	1	2	1	1	2	2	2	2	2	2	1	1	1	1	1	1	1	1	1	1	1
1070	2	2	2	2	1	1	1	1	1	1	2	2	1	2	2	1	1	2	2	2	2	2	1	2	1	2	1	1	1	1	1	2	2	2	2	2	2	2
1071	1	1	2	1	1	2	2	1	1	2	1	1	1	1	1	1	1	2	2	2	1	2	2	1	2	2	2	1	1	2	1	1	1	1	1	2	2	1
1072	1	2	1	1	1	2	2	1	1	1	2	1	1	2	2	1	2	1	2	2	1	1	2	2	2	2	2	1	2	2	1	1	1	1	1	1	1	1
1073	1	2	2	1	1	2	2	1	1	1	1	1	1	1	1	1	1	2	1	1	2	2	2	1	2	2	2	1	1	1	2	1	1	2	1	2	2	1
1074	1	1	1	1	1	2	2	1	1	1	1	1	1	1	1	1	1	2	1	1	1	1	2	2	1	2	2	1	2	2	1	1	1	1	1	1	1	2
1075	1	2	2	1	1	2	2	2	1	1	2	1	1	1	2	1	1	2	2	2	2	2	1	2	2	2	2	2	2	1	1	1	1	1	1	2	1	1
1076	2	1	2	1	2	2	1	1	1	1	1	1	1	2	1	1	1	2	2	2	2	2	2	2	2	2	2	1	2	1	1	1	2	2	1	2	1	1
1077	1	2	2	1	1	2	2	1	1	1	1	1	1	1	1	1	1	2	1	1	1	2	1	2	1	2	1	1	1	1	1	1	1	1	1	1	1	1
1078	1	2	1	1	2	2	2	1	1	1	1	1	1	1	2	1	1	1	2	2	2	1	2	2	2	2	2	2	1	2	1	1	1	2	2	1	2	1
1079	1	2	1	1	2	2	2	1	1	1	1	1	1	1	1	1	1	1	2	2	1	1	1	2	2	1	1	1	2	2	1	1	1	1	1	2	1	1
1080	1	1	1	1	1	2	2	1	1	1	1	1	1	1	1	1	1	1	2	2	2	1	2	2	2	2	2	1	1	1	1	1	1	1	1	1	1	1
1081	1	1	2	1	1	2	2	1	1	2	1	1	1	1	1	1	1	1	1	1	1	1	2	2	2	2	1	2	2	2	2	2	2	2	2	2	2	2
1082	1	2	2	1	1	2	2	1	1	1	1	1	1	1	1	1	1	1	1	2	2	1	2	2	2	2	2	1	2	1	1	2	2	1	1	2	2	2
1083	2	2	1	2	1	2	2	1	1	1	1	1	2	1	1	1	1	1	2	2	1	1	2	1	2	2	2	2	2	1	1	1	2	2	2	1	1	1
1084	2	2	2	1	1	2	2	1	1	1	1	1	1	2	2	1	1	2	2	2	1	2	2	2	2	1	1	2	2	1	1	2	1	1	2	2	2	1
1085	1	2	2	1	1	2	2	1	1	1	1	1	1	1	1	1	1	2	2	2	2	2	2	2	2	1	1	2	2	1	1	1	1	2	2	2	2	2
1086	1	2	1	1	1	2	2	1	1	1	1	1	1	1	1	1	1	2	2	2	1	2	2	1	2	2	2	2	2	2	2	1	2	2	2	2	2	1
1087	1	1	2	1	1	2	2	1	1	1	1	1	1	1	1	1	1	2	1	1	1	2	2	1	2	2	1	1	1	1	1	1	1	1	1	1	1	1
1088	1	1	1	1	1	2	2	1	1	1	1	1	1	1	1	1	1	2	1	1	1	2	1	1	1	2	1	1	1	1	1	1	1	1	1	2	1	1
1089	1	2	2	1	1	2	2	1	1	1	1	1	1	1	1	1	2	1	2	2	1	1	1	2	2	2	2	2	2	2	1	1	2	2	2	1	1	1
1090	2	2	2	2	1	1	1	1	1	1	1	2	1	2	2	2	1	1	2	2	1	1	2	2	2	2	2	2	2	1	1	1	1	2	2	1	1	2
1091	1	2	2	1	1	1	1	2	1	1	1	1	2	1	1	1	1	1	1	1	2	1	2	2	2	1	2	2	2	1	1	2	1	1	1	2	2	2
1092	2	2	2	2	1	2	1	1	1	1	2	2	1	1	1	1	1	1	1	1	1	2	2	2	2	2	2	2	2	1	1	1	1	1	1	1	2	2
1093	1	2	2	2	1	2	1	1	1	1	1	2	1	1	1	1	1	2	2	2	1	2	2	2	2	2	2	2	2	1	1	2	1	2	2	2	1	2
1094	2	2	2	2	1	2	1	1	1	1	1	2	2	1	1	1	2	2	2	2	2	2	2	2	1	2	2	1	1	2	1	1	1	1	1	1	1	1
1095	1	1	1	1	1	2	2	1	1	1	1	1	1	1	1	1	1	1	1	2	2	2	2	1	2	1	1	1	2	2	1	1	2	1	1	2	2	2
1096	1	2	2	1	1	2	2	1	1	1	1	1	1	1	1	1	1	1	1	1	1	1	1	1	2	2	2	1	2	1	1	1	1	1	2	1	2	2
1097	1	2	2	1	1	2	2	1	1	1	1	1	1	1	1	1	1	2	1	1	2	2	2	1	2	1	1	1	1	1	1	1	1	1	1	1	2	2
1098	1	1	1	1	1	1	1	1	1	1	1	1	1	1	1	1	1	1	2	1	1	1	1	1	1	1	1	1	1	2	1	1	1	1	1	2	2	1
1099	1	2	1	1	1	2	2	1	1	1	1	1	1	1	1	1	1	1	2	2	1	1	1	1	2	2	1	1	1	2	1	1	1	1	1	2	2	1
1100	1	2	1	1	1	2	2	1	1	1	1	1	1	1	1	1	2	1	2	2	1	1	1	1	1	1	1	1	2	2	1	1	1	1	1	1	1	1
1101	1	1	2	1	1	2	2	1	1	1	1	1	1	1	1	1	1	1	2	2	1	1	1	1	1	1	1	1	1	1	1	1	1	1	1	1	1	1
1102	1	2	2	1	1	2	1	1	1	1	1	1	1	1	1	1	1	2	1	1	1	2	2	2	2	2	2	2	2	1	1	1	1	1	1	1	1	1
1103	1	1	2	1	1	2	2	1	1	1	1	1	1	1	1	1	1	1	2	2	1	1	1	1	2	2	1	1	2	1	1	1	1	1	1	2	1	2
1104	1	1	1	1	1	2	1	1	1	1	1	1	1	1	1	1	1	2	2	2	1	2	2	1	2	2	2	2	1	2	1	2	1	1	1	1	2	1
1105	1	2	1	1	1	2	2	1	1	1	1	1	1	1	2	1	2	2	2	1	1	2	2	2	2	2	2	2	2	1	1	1	1	2	2	1	1	1
1106	2	2	2	2	1	2	1	1	1	1	1	2	1	2	1	1	1	1	1	2	1	2	2	2	2	2	2	2	2	1	1	1	1	1	1	2	1	2
1107	1	1	1	1	2	2	2	1	2	1	1	1	1	1	1	1	1	2	1	2	1	2	2	1	1	2	2	1	2	1	1	1	2	2	1	2	2	1
1108	1	2	2	1	2	2	2	2	1	1	1	1	1	1	2	1	1	2	1	2	1	2	2	2	1	1	2	1	2	1	2	1	1	1	2	2	1	1
1109	1	2	2	1	1	2	2	2	1	1	1	1	1	1	1	1	1	1	1	1	1	1	2	2	2	2	2	1	2	2	1	1	1	1	1	2	2	1
1110	2	2	2	2	2	2	2	2	1	1	2	2	2	1	1	1	1	2	2	2	1	2	2	2	2	2	2	2	2	2	1	1	1	1	2	1	1	1
1111	1	1	2	1	1	2	2	1	2	1	1	1	1	1	1	1	1	1	1	1	1	2	1	2	2	2	2	1	2	2	2	1	1	1	1	1	1	1
1112	1	1	2	2	2	2	2	2	2	1	2	2	1	1	1	1	1	1	1	1	2	1	1	2	2	2	2	2	1	2	1	1	1	2	2	2	1	1
1113	1	1	1	1	1	2	2	1	1	1	1	1	1	1	1	1	1	1	1	1	1	1	1	1	1	1	1	1	1	2	1	2	1	1	1	1	2	1
1114	1	1	1	1	1	2	2	1	1	2	1	1	1	2	1	1	2	1	1	1	1	1	1	1	1	1	1	1	1	2	1	1	1	1	1	1	2	1
1115	1	2	2	1	1	2	2	2	1	1	1	1	1	1	1	1	2	2	2	2	1	2	1	2	2	2	2	1	2	2	1	1	1	2	1	1	1	2
1116	1	2	2	1	2	2	2	2	1	1	1	1	1	2	2	1	1	2	1	1	2	1	1	1	1	2	1	1	1	1	2	1	1	1	1	1	1	1
1117	1	2	2	1	1	2	2	2	1	2	1	1	1	1	1	1	2	1	1	1	1	1	1	1	1	1	1	2	1	1	1	1	1	2	2	2	2	2
1118	1	1	2	1	2	2	2	2	2	1	2	1	1	1	1	1	1	1	2	2	1	1	1	1	1	2	2	1	2	1	1	1	1	1	1	1	1	1
1119	1	1	2	1	1	2	2	1	1	1	1	1	1	1	1	1	1	1	1	1	1	1	1	1	1	1	1	1	1	2	1	1	1	2	1	1	1	1
1120	1	1	1	1	2	2	2	1	1	1	1	1	1	1	1	1	1	1	1	1	1	1	1	1	1	2	1	1	1	2	1	2	1	1	1	1	2	1
1121	1	1	2	1	1	1	1	1	1	1	1	1	1	1	1	1	1	2	1	1	1	2	1	2	2	1	2	1	2	2	1	1	1	1	1	2	2	1
1122	1	2	1	1	1	2	1	2	1	1	1	1	1	2	1	2	2	1	1	1	1	1	2	2	2	2	2	2	1	1	1	2	1	1	1	2	2	2
1123	1	2	1	1	1	2	1	2	1	1	1	1	1	2	1	1	2	1	2	2	1	1	2	2	2	2	2	2	1	1	1	1	2	2	2	2	2	1
1124	1	1	1	1	2	2	2	1	2	1	1	1	1	2	1	1	1	1	2	2	1	1	1	2	2	2	2	1	2	2	1	1	2	1	1	2	2	2
1125	1	1	2	1	1	2	2	2	2	1	2	1	1	1	1	1	1	2	1	1	2	2	1	1	2	2	1	1	1	2	1	1	1	1	1	2	1	1
1126	1	2	2	1	1	2	1	1	1	1	1	1	1	1	1	1	1	2	2	2	1	2	1	1	2	1	1	2	1	2	2	1	1	1	1	1	1	1
1127	1	1	1	1	1	2	2	1	1	1	1	1	1	1	1	1	1	1	1	1	2	2	2	2	2	2	2	1	1	2	2	2	1	2	1	1	1	2
1128	1	2	2	1	1	2	1	1	1	1	1	1	1	1	1	1	1	1	1	2	1	1	1	1	2	2	2	1	1	2	1	1	1	1	1	2	1	1
1129	1	1	2	1	1	2	2	1	1	1	1	1	1	1	1	1	2	1	1	1	2	1	1	1	2	1	1	1	2	1	1	1	1	1	1	2	2	1
1130	1	2	1	1	1	2	2	1	1	1	2	1	1	1	2	1	2	2	2	2	1	1	1	2	2	2	2	2	1	1	1	1	1	1	1	2	1	2
1131	2	1	2	1	1	1	1	1	1	1	1	1	1	1	1	2	1	2	1	2	1	1	1	1	2	2	2	2	1	1	2	1	1	1	1	1	1	1
1132	1	2	1	1	1	2	2	1	1	1	1	1	1	2	1	1	1	1	1	1	2	1	2	1	2	1	1	1	2	2	1	1	2	1	1	2	1	1
1133	1	1	2	1	1	2	2	2	1	1	2	1	1	1	1	1	2	2	1	1	1	2	2	1	2	2	2	1	2	2	1	1	1	1	1	1	1	1
1134	1	2	2	1	1	2	2	1	1	1	1	1	1	1	1	1	1	1	1	1	1	1	1	2	2	2	1	1	2	1	1	1	1	1	1	2	2	1
1135	1	1	1	1	1	2	2	1	1	1	1	1	1	1	1	1	1	2	1	2	2	2	1	2	1	2	1	1	2	2	2	1	1	1	1	1	2	1
1136	1	2	1	1	1	2	2	1	1	1	1	1	1	1	1	1	2	1	2	1	1	1	1	1	2	1	1	1	1	1	1	1	1	1	1	2	2	1
1137	1	2	2	1	2	2	2	1	2	1	2	1	1	1	1	1	2	1	1	1	2	1	1	1	1	1	1	1	1	2	2	2	1	1	1	1	1	1
1138	1	1	1	1	1	2	2	1	1	1	2	2	1	1	1	1	1	2	1	2	2	2	2	1	2	2	2	1	2	2	1	1	1	1	1	1	1	1
1139	2	2	2	2	1	1	1	2	1	1	2	2	1	2	1	1	2	1	1	1	1	2	2	2	2	2	2	2	2	2	2	2	2	1	1	2	2	2
1140	2	2	2	1	1	1	2	1	1	2	2	2	2	2	1	2	1	1	1	1	1	1	1	1	1	2	1	2	1	1	1	1	1	2	2	1	2	2
1141	1	1	1	1	1	2	2	1	1	1	1	1	1	1	1	1	1	1	1	1	2	1	2	1	2	1	1	1	1	2	1	1	1	1	1	1	2	1
1142	1	1	1	1	1	2	2	1	1	1	1	1	1	1	1	1	1	1	1	1	1	1	1	1	1	2	2	1	1	2	1	1	1	1	1	1	1	1
1143	1	1	2	1	1	2	2	1	1	1	1	1	1	1	1	1	1	2	2	2	2	2	2	2	2	2	2	1	1	2	2	2	1	2	2	2	1	1
1144	1	1	2	1	2	2	2	1	1	1	1	1	1	1	1	1	1	1	2	2	1	1	1	1	1	1	1	1	2	1	1	2	1	1	1	1	2	2
1145	1	1	2	1	2	2	2	1	1	1	1	1	1	1	1	1	1	2	1	1	2	2	1	1	1	2	2	1	1	2	1	1	1	1	1	1	1	1
1146	1	2	2	2	1	2	2	1	1	1	2	2	1	1	1	1	2	1	1	1	1	2	2	2	2	2	2	2	2	1	1	1	2	1	1	2	2	2
1147	1	1	2	1	2	2	2	2	1	1	1	1	1	1	1	1	1	2	2	2	1	2	2	2	2	2	2	1	2	1	1	1	1	1	2	1	1	1
1148	1	2	2	1	1	1	1	1	1	1	1	1	1	1	1	1	1	1	2	2	1	1	2	2	2	1	1	1	2	1	1	1	1	1	1	1	1	1
1149	1	1	2	2	1	2	2	1	1	1	2	2	1	1	1	1	1	1	2	2	1	1	2	1	2	2	2	1	1	1	1	1	1	1	1	1	1	2
1150	1	2	1	1	1	2	2	1	2	1	1	1	1	1	1	1	1	2	1	1	1	2	2	1	2	2	2	2	2	1	1	1	1	1	1	1	2	1
1151	1	1	2	1	1	2	2	1	1	1	2	1	1	1	1	1	1	1	1	1	1	1	1	2	2	2	2	1	2	2	2	2	1	2	2	1	1	1
1152	1	1	1	1	1	1	1	2	1	1	1	1	1	1	1	1	1	2	1	1	1	1	1	1	1	2	2	1	1	1	1	1	1	1	1	1	1	2
1153	1	1	2	1	1	2	2	1	1	1	1	1	1	1	1	1	1	1	1	2	1	1	1	1	2	2	2	1	2	2	1	1	1	1	1	1	1	2
1154	1	1	2	1	1	2	1	1	1	2	1	2	2	1	1	1	1	2	2	2	1	2	2	2	2	2	2	2	2	1	1	1	1	2	1	1	1	1
1155	1	1	1	1	1	1	1	1	1	1	1	1	1	1	1	1	1	2	1	2	2	1	1	1	1	1	1	2	1	1	1	2	2	2	2	2	2	2
1156	1	1	1	1	2	2	2	1	2	1	1	1	1	1	2	1	1	1	1	1	1	1	2	2	2	2	2	2	2	2	1	1	1	1	1	1	1	1
1157	1	1	2	1	2	2	2	1	1	2	1	1	1	1	1	1	1	1	2	2	1	1	1	1	1	2	2	1	1	1	1	2	2	1	1	1	1	1
1158	1	1	1	1	1	2	2	1	1	1	1	1	1	1	1	1	1	1	1	2	1	2	2	1	2	1	1	1	2	2	2	1	1	1	1	1	2	2
1159	1	1	2	1	1	2	2	1	1	1	1	1	1	1	1	1	1	2	2	2	2	2	2	2	1	1	2	1	2	2	2	1	1	2	1	1	2	2
1160	1	1	2	1	1	2	2	1	1	1	1	1	1	1	1	1	1	1	2	2	1	2	2	1	1	2	2	1	2	2	2	1	1	2	1	1	1	1
1161	1	1	2	1	2	2	2	1	2	1	1	1	1	1	1	1	1	1	2	2	1	1	1	2	2	2	2	2	2	1	1	2	2	1	1	2	1	2
1162	1	1	2	1	1	2	1	1	1	1	1	1	1	1	1	1	1	1	1	1	1	2	2	1	1	1	1	1	2	2	1	1	2	2	1	1	1	2
1163	1	2	2	1	1	2	2	1	1	2	1	1	1	2	1	1	1	1	2	2	1	1	2	2	2	2	2	2	2	1	1	1	2	1	2	2	2	2
1164	1	1	2	1	2	2	2	1	1	1	1	1	1	1	1	1	1	1	1	1	1	1	2	1	1	2	1	1	2	1	2	1	1	2	1	2	2	1
1165	1	1	2	1	1	2	2	1	1	1	1	1	1	1	1	1	1	2	1	1	1	1	2	2	2	2	2	1	2	1	1	2	2	1	1	1	1	2
1166	1	1	1	1	2	2	2	1	1	1	1	1	1	1	1	1	1	1	1	2	2	1	1	1	2	2	1	1	1	2	1	1	2	1	1	1	1	1
1167	1	2	2	1	2	2	2	2	2	1	1	1	1	1	1	1	1	1	2	2	2	1	1	1	2	2	2	1	1	1	1	2	2	2	1	1	1	1
1168	1	2	2	1	2	2	2	1	1	1	1	1	1	1	1	1	1	1	1	2	1	1	1	2	2	2	2	1	1	1	1	1	1	1	1	2	1	1
1169	1	1	2	1	2	2	2	2	2	1	1	1	1	1	1	1	1	1	2	2	1	1	2	1	2	1	1	1	1	1	1	1	1	1	1	1	1	1
1170	1	1	2	1	2	2	2	1	1	1	1	1	1	1	1	1	1	1	1	1	2	1	2	2	2	2	1	1	1	1	2	1	1	1	1	1	1	1
1171	1	1	2	1	2	2	2	1	1	1	1	1	1	1	1	1	1	1	1	1	1	2	2	1	2	2	2	1	1	2	2	1	1	1	1	1	1	2
1172	1	1	2	1	1	1	1	1	1	1	1	1	1	1	1	1	1	1	2	2	2	1	2	2	2	2	2	2	2	2	1	2	2	2	2	2	1	2
1173	1	1	2	1	1	2	1	1	1	1	1	1	1	1	1	1	1	2	2	2	2	2	2	2	1	1	2	1	2	1	1	1	1	2	1	1	2	2
1174	1	1	1	1	2	2	2	2	1	1	1	1	1	1	1	1	1	1	1	1	1	1	2	2	2	2	2	1	1	1	1	1	1	1	1	1	1	1
1175	1	1	1	1	1	2	2	1	1	1	1	1	1	1	1	1	1	2	2	2	2	1	2	2	1	2	2	1	2	2	2	1	1	2	1	1	1	2
1176	1	2	2	1	2	2	2	1	1	1	1	1	1	1	1	1	1	2	2	2	2	2	2	2	2	2	2	1	2	1	1	1	1	1	2	1	1	1
1177	1	1	1	1	1	2	2	1	1	1	1	1	1	1	1	1	1	2	1	2	2	1	2	2	2	1	1	1	1	2	1	1	1	1	1	1	2	2
1178	1	2	2	1	1	2	2	1	1	2	2	1	1	2	1	1	1	1	1	1	2	1	2	2	2	2	2	2	2	2	2	1	1	2	2	2	2	2
1179	1	1	2	1	2	2	2	1	1	1	1	1	1	1	1	1	1	1	2	1	1	1	1	1	2	2	2	1	2	1	1	1	1	1	1	2	1	1
1180	1	1	2	1	1	1	1	1	1	1	1	1	1	1	1	1	1	2	1	2	1	1	1	1	1	2	2	1	2	2	1	1	1	2	2	2	2	2
1181	1	1	2	1	1	2	2	1	1	1	1	1	1	1	1	1	1	1	2	1	1	1	2	2	2	2	2	1	2	1	2	1	1	1	1	2	1	1
1182	1	2	2	1	1	2	2	2	1	1	1	1	1	2	1	1	1	1	1	1	2	1	2	2	2	2	2	2	2	1	1	1	1	2	2	2	2	1
1183	1	1	1	1	1	2	2	1	1	1	2	1	1	1	1	1	1	1	2	1	1	1	1	1	1	1	1	2	2	1	1	1	2	2	1	1	1	1
1184	1	2	2	1	2	2	2	1	1	1	1	1	1	1	1	1	1	1	1	1	1	1	1	1	1	2	2	1	1	1	1	1	1	1	1	1	1	2
1185	1	1	1	1	1	2	2	1	1	1	1	1	1	1	1	1	2	1	1	1	1	1	2	1	1	2	1	1	1	1	2	1	1	1	1	1	1	1
1186	1	2	2	2	1	2	2	2	1	1	2	2	1	1	2	1	1	1	1	1	1	1	2	2	2	2	2	2	1	1	1	1	1	2	2	2	2	2
1187	2	2	2	2	1	2	2	1	1	1	1	2	2	2	1	2	2	1	1	1	2	1	2	2	2	2	2	2	2	2	1	1	2	2	2	2	1	2
1188	1	1	2	1	2	2	2	1	1	1	1	1	1	1	1	1	1	2	2	1	1	1	1	2	2	2	2	1	2	1	1	2	2	1	2	1	1	2
1189	1	2	1	1	2	2	1	1	1	1	1	1	1	2	1	1	2	1	1	1	1	1	1	2	2	2	2	2	2	1	1	2	2	1	1	2	1	2
1190	1	1	2	1	1	2	2	1	1	1	1	1	1	1	2	1	1	1	2	2	1	1	2	2	2	2	2	2	2	1	1	1	2	1	1	2	2	2
1191	1	1	1	1	1	2	2	1	2	1	2	1	1	1	1	1	1	1	2	1	1	1	1	2	2	1	1	2	2	1	1	1	1	1	1	1	2	1
1192	1	2	2	1	1	1	1	1	1	1	1	1	1	1	1	1	1	1	1	1	1	1	2	2	2	2	2	1	1	1	1	1	1	1	1	2	1	2
1193	1	1	2	1	2	2	2	1	1	2	1	2	1	1	1	1	1	1	1	1	1	1	1	1	2	2	2	2	1	1	2	2	2	2	2	1	1	1
1194	1	2	2	1	1	2	2	1	1	1	1	1	1	2	1	1	2	1	2	1	1	1	2	2	2	2	2	2	2	1	1	1	2	1	1	2	1	2
1195	1	1	1	1	2	2	2	1	2	1	1	1	1	1	1	1	1	1	1	1	1	2	2	1	1	1	1	1	1	2	2	1	1	1	1	1	1	1
1196	1	1	1	1	1	2	2	1	2	1	1	1	1	1	1	1	1	1	2	2	1	1	1	1	2	2	2	1	1	2	1	1	1	1	2	2	1	1
1197	1	1	2	1	2	2	2	2	1	1	1	1	1	1	1	1	1	2	1	1	2	2	2	2	2	2	2	1	2	2	1	1	1	2	1	2	1	2
1198	1	1	2	1	2	2	2	1	2	1	1	1	1	1	1	1	1	1	1	1	1	1	1	1	1	2	2	1	2	1	1	1	1	1	1	1	1	1
1199	1	1	1	1	2	2	2	1	1	1	1	1	1	1	1	1	1	1	1	2	1	1	1	1	2	2	2	1	1	2	1	1	1	1	1	1	1	1
1200	1	2	2	1	2	2	2	1	1	1	1	1	1	1	1	1	1	2	2	2	2	2	2	2	1	2	1	2	1	1	1	1	1	2	2	2	1	1
1201	1	1	2	1	2	2	2	2	1	1	1	1	1	1	1	1	1	1	2	2	1	1	1	2	2	1	1	1	1	1	1	1	1	1	1	2	2	1
1202	1	1	1	1	1	2	1	1	1	1	1	1	1	1	1	1	1	1	2	2	1	1	1	2	2	1	1	1	2	2	2	1	1	2	1	2	2	2
1203	1	1	2	1	1	2	2	1	1	1	1	1	1	1	1	1	1	1	1	1	1	1	1	1	1	2	1	1	2	2	1	1	1	1	1	1	2	1
1204	1	1	2	1	1	2	2	1	1	1	1	1	1	1	1	1	1	1	1	1	1	2	2	1	2	1	2	1	1	2	1	1	1	1	1	2	2	2
1205	1	2	2	1	1	2	2	2	2	1	1	1	1	1	1	1	1	1	2	2	1	1	1	2	2	2	2	1	2	2	2	1	2	1	1	1	2	1
1206	1	1	2	1	2	2	2	1	2	1	1	1	1	1	1	1	1	2	2	1	1	2	2	1	2	2	2	1	2	1	1	1	1	1	1	1	1	1
1207	2	2	2	2	1	2	2	2	1	1	1	1	1	2	2	1	1	2	2	1	1	1	1	2	1	2	1	2	2	2	1	2	2	2	2	2	2	2
1208	1	1	2	1	1	2	2	1	1	1	1	1	1	1	1	1	1	1	1	1	2	1	2	2	2	2	2	2	2	1	1	2	2	2	2	1	1	2
1209	1	2	1	1	1	2	2	1	1	1	1	1	1	1	1	1	1	1	1	1	1	1	1	1	2	1	1	1	2	1	2	1	1	1	1	1	1	1
1210	1	1	2	1	1	2	2	2	1	1	1	1	1	1	1	1	1	2	1	2	1	1	1	1	1	2	2	1	2	2	1	1	1	1	1	1	1	2
1211	1	2	2	1	1	2	2	1	2	1	1	1	1	1	1	1	1	1	2	2	1	1	2	2	2	2	2	2	2	2	1	1	1	1	1	1	1	1
1212	1	2	2	2	1	2	1	1	1	1	1	2	1	1	1	1	2	1	1	1	2	2	2	1	2	2	2	2	2	1	1	1	1	1	1	2	1	2
1213	1	2	2	1	1	2	2	1	1	1	1	1	1	1	1	1	1	2	1	1	2	2	1	2	2	1	2	1	2	1	2	1	1	1	1	1	1	1
1214	1	1	2	1	1	2	2	1	2	1	1	1	1	1	1	1	1	1	1	1	2	1	2	1	2	2	2	1	2	2	1	2	2	1	1	1	1	2
1215	1	1	1	1	2	2	2	1	1	1	1	1	1	1	1	1	1	2	1	1	2	2	1	2	2	2	2	1	2	2	1	1	1	1	1	1	2	1
1216	1	2	2	1	1	2	2	1	1	1	1	1	1	1	1	1	1	2	1	2	1	2	2	1	2	2	2	2	2	2	2	1	1	1	1	1	2	1
1217	1	1	1	1	1	2	1	1	2	1	1	1	1	1	1	1	1	2	2	1	1	1	1	2	2	2	2	1	2	2	1	1	1	1	1	2	2	1
1218	1	1	2	1	1	2	2	1	1	1	1	1	1	1	1	1	1	1	1	1	1	2	2	1	2	2	2	2	1	1	1	1	1	1	1	2	2	1
1219	1	1	2	1	1	2	2	1	2	1	1	1	1	1	1	1	1	1	2	2	1	1	2	2	2	1	1	1	2	2	1	1	1	1	1	1	1	1
1220	1	2	2	1	1	2	2	1	2	1	1	1	1	1	1	1	1	1	1	1	1	1	1	1	1	2	2	1	2	2	2	1	1	1	1	1	2	1
1221	1	2	2	1	1	2	2	1	1	2	2	1	1	1	2	1	1	2	2	2	2	2	1	2	2	2	2	2	2	2	1	2	1	1	2	2	2	1
1222	1	1	2	1	2	2	2	1	1	2	1	1	1	1	2	1	2	1	2	2	1	1	1	1	2	2	2	1	2	2	2	1	2	2	2	2	2	1
1223	1	1	1	1	1	2	2	1	1	1	1	1	1	1	2	1	1	1	1	2	1	2	2	1	1	1	1	1	1	2	1	1	1	2	2	1	1	1
1224	2	2	1	2	1	2	2	1	1	2	1	2	1	1	1	1	2	1	2	2	1	1	2	2	2	2	2	1	2	2	1	1	1	1	1	2	2	2
1225	1	1	2	1	1	2	2	2	1	1	1	1	1	1	1	1	1	1	2	2	1	1	2	1	2	2	2	1	2	1	1	1	1	1	1	1	1	2
1226	1	1	1	1	1	2	2	1	2	1	1	1	1	1	1	1	2	1	1	1	1	1	1	1	1	2	1	1	1	2	1	1	1	1	1	2	2	1
1227	1	1	1	1	2	2	2	1	2	1	1	1	1	1	2	1	1	1	1	2	1	1	2	1	1	1	1	1	1	2	1	1	2	1	1	1	2	1
1228	1	1	2	1	1	2	2	2	1	1	1	2	1	2	2	1	1	1	1	1	1	2	2	1	2	2	1	2	2	1	1	1	2	1	1	2	1	2
1229	1	2	2	2	1	2	2	2	1	1	1	1	1	1	1	1	1	2	1	1	1	2	2	2	2	2	2	1	2	1	1	1	1	2	2	1	1	1
1230	1	1	1	1	1	2	2	1	1	1	1	1	1	1	1	1	1	1	1	1	1	1	2	1	1	1	1	1	1	2	1	1	1	1	1	1	2	1
1231	1	2	1	1	1	2	2	2	1	1	1	1	1	1	1	2	1	2	1	1	1	2	2	2	2	2	2	2	1	1	1	1	2	1	1	1	1	1
1232	1	2	1	1	1	1	1	2	1	1	1	1	1	1	1	1	1	1	2	1	1	2	2	2	2	2	2	2	1	1	1	1	1	2	1	1	2	1
1233	2	2	1	2	1	1	1	1	1	1	1	2	2	1	1	1	1	2	2	2	1	2	2	1	2	2	2	2	1	1	1	1	1	1	1	1	1	1
1234	1	1	2	1	1	1	1	1	1	1	1	1	1	1	1	1	1	1	1	1	1	1	1	1	2	2	2	1	2	2	1	1	1	1	1	1	1	1
1235	1	2	1	1	1	2	2	2	1	1	1	1	1	1	1	1	1	1	2	1	1	1	1	1	1	1	1	1	1	1	1	1	1	1	1	2	1	1
1236	1	2	2	1	1	2	2	1	2	1	1	1	1	1	1	1	2	1	1	1	2	1	1	1	2	1	1	1	1	2	1	2	1	2	1	1	1	1
1237	1	1	1	1	2	2	2	1	2	1	1	1	1	1	2	1	1	1	1	2	1	1	1	1	2	2	1	1	1	2	1	1	1	1	1	2	2	1
1238	1	1	2	1	1	2	2	1	1	1	1	1	1	1	1	1	1	1	2	2	1	1	2	2	2	2	2	1	2	1	1	1	1	1	1	2	1	1
1239	1	2	2	1	1	2	2	1	1	1	1	1	1	1	1	1	2	1	1	1	1	1	1	1	1	1	1	1	1	1	1	1	1	1	1	1	2	1
1240	1	1	2	1	1	2	2	1	1	1	1	1	1	1	1	1	1	2	1	1	2	1	2	2	2	1	1	1	2	2	1	1	1	1	1	1	1	2
1241	1	1	1	1	1	2	2	1	2	1	1	1	1	1	1	1	1	1	2	2	1	1	2	1	1	2	2	1	2	2	2	1	1	1	1	1	1	1
1242	2	2	2	2	1	2	2	2	2	2	2	2	1	1	2	1	1	2	1	2	1	2	2	2	2	2	2	2	1	1	1	1	1	2	2	1	1	2
1243	1	2	1	1	1	2	2	1	1	1	1	1	1	1	1	1	1	2	1	1	2	2	2	1	1	2	2	1	1	2	1	1	1	2	1	2	2	1
1244	1	2	2	1	1	2	2	1	1	1	1	1	1	1	1	1	1	2	1	1	1	2	2	2	1	2	1	1	1	1	1	1	1	1	1	1	1	1
1245	1	2	1	1	1	2	2	2	2	1	1	1	1	1	1	1	1	1	1	2	1	1	1	1	2	1	1	2	1	2	2	1	1	1	1	1	1	2
1246	1	2	2	1	1	2	2	2	2	2	1	1	1	1	1	2	1	2	1	1	1	1	1	2	2	2	1	1	2	2	2	1	1	1	1	2	1	1
1247	1	1	1	1	1	2	2	2	1	2	1	1	1	1	1	1	1	1	1	1	1	1	1	1	1	2	1	1	2	2	2	2	1	2	1	2	2	1
1248	1	1	2	1	1	2	1	1	2	1	1	1	1	1	1	1	1	2	1	1	1	2	1	1	2	2	1	2	2	2	1	1	2	1	1	1	2	2
1249	1	1	2	1	1	2	2	1	2	1	1	1	1	1	1	1	1	1	1	1	1	2	1	1	1	2	1	1	1	1	1	1	1	1	1	1	1	2
1250	2	2	2	2	1	2	2	1	1	1	1	1	1	2	1	1	2	2	2	2	2	1	1	2	2	2	2	2	2	2	1	1	1	1	2	1	2	1
1251	1	1	2	1	2	2	2	1	1	1	1	1	1	1	1	1	1	1	1	1	1	1	1	1	2	2	1	1	2	1	1	1	1	1	1	1	2	2
1252	1	2	2	2	2	2	2	2	1	1	1	2	1	1	1	1	1	1	2	2	2	1	2	2	2	2	2	2	2	2	1	2	2	2	2	2	1	2
1253	1	1	1	1	2	2	2	2	2	1	1	1	1	1	1	1	1	2	1	1	1	2	2	1	2	2	2	1	2	2	2	2	2	1	1	1	1	2
1254	1	2	1	1	1	2	2	1	1	1	1	1	1	2	2	1	1	1	1	1	1	1	1	1	2	2	2	2	2	1	2	1	1	1	1	2	2	2
1255	1	1	2	1	1	2	1	1	1	2	1	1	1	1	1	1	1	1	2	2	1	1	1	1	2	1	1	1	1	1	1	1	1	1	1	1	2	1
1256	2	2	2	2	1	2	2	1	1	1	2	2	2	2	1	1	2	1	1	2	2	2	2	2	2	2	2	1	2	1	1	1	2	2	2	2	1	2
1257	1	1	2	1	1	2	2	1	1	1	1	1	1	1	1	1	1	1	2	2	1	1	1	1	2	2	1	1	1	1	1	1	1	2	2	1	2	2
1258	1	1	2	1	2	2	2	1	1	1	1	1	1	1	1	1	1	1	1	1	1	1	2	1	2	1	1	1	2	1	1	1	1	1	1	2	2	2
1259	1	1	1	1	1	2	1	1	1	1	1	1	1	1	1	1	1	1	1	1	1	2	2	1	2	1	2	1	2	2	1	1	1	2	1	1	2	1
1260	1	1	1	1	2	2	2	1	2	1	1	1	1	1	1	1	1	2	1	1	1	2	2	1	1	1	1	1	1	2	1	1	1	1	1	1	1	1
1261	1	1	1	1	2	2	2	1	1	1	1	1	1	1	2	1	2	1	1	2	1	1	1	1	2	2	2	1	2	2	1	2	1	2	2	2	2	2
1262	1	2	1	1	1	2	2	1	1	1	1	1	1	1	1	1	1	1	1	2	1	1	1	2	2	1	1	2	1	2	1	1	1	1	1	2	1	1
1263	1	1	2	1	1	2	2	1	1	1	1	1	1	1	1	1	1	1	1	1	1	1	1	1	1	2	2	1	2	2	1	1	1	1	1	2	2	1
1264	1	1	1	1	1	2	2	1	1	1	1	1	1	1	1	1	1	2	1	1	1	2	2	1	2	2	2	1	1	2	2	1	1	1	1	1	1	1
1265	1	1	1	1	1	2	2	1	1	1	1	1	1	1	1	1	1	2	1	1	1	2	1	2	1	2	1	1	1	2	1	1	1	1	1	1	1	1
1266	1	2	1	1	1	2	2	1	1	1	1	1	1	1	2	1	2	1	1	2	1	1	1	1	2	1	1	1	1	2	1	1	2	2	1	2	1	1
1267	1	1	1	1	1	2	2	1	1	1	1	1	1	1	1	1	1	2	1	1	1	2	2	1	1	1	1	1	1	2	2	1	2	2	1	2	2	1
1268	1	2	1	1	1	2	1	1	1	1	1	1	1	1	1	1	2	1	1	1	1	1	1	1	2	2	2	1	2	1	1	1	1	1	1	1	1	1
1269	1	2	1	1	1	2	2	1	2	2	2	1	1	1	1	1	2	2	1	1	1	2	2	1	1	2	2	1	1	1	1	1	1	1	1	1	2	2
1270	1	1	2	1	1	2	1	2	2	1	1	1	1	1	1	1	1	1	2	2	1	1	1	1	1	2	2	1	1	1	1	2	1	1	1	1	2	1
1271	1	2	1	1	1	2	2	2	1	1	1	1	1	1	1	1	1	1	1	1	1	1	1	1	2	1	1	1	1	2	1	1	1	1	1	2	1	2
1272	1	1	2	1	1	2	2	1	1	1	1	1	1	1	1	1	1	1	2	2	2	1	2	1	2	2	2	1	2	1	1	1	1	1	1	1	1	1
1273	1	1	1	1	1	2	2	1	1	1	1	1	1	1	2	1	1	1	1	2	1	1	1	1	1	1	1	1	1	2	1	1	1	1	1	1	2	1
1274	1	2	1	1	1	2	2	1	1	1	1	1	1	1	1	1	1	1	1	1	1	1	2	1	2	1	1	1	1	2	1	1	1	1	1	1	1	1
1275	1	1	1	1	1	2	1	1	1	1	1	1	1	1	1	1	1	1	1	1	1	1	1	1	1	1	1	1	1	2	1	1	1	1	1	1	1	1
1276	1	2	2	1	1	2	2	1	2	1	1	1	1	1	1	1	2	1	1	1	1	1	1	1	2	2	2	2	2	2	1	1	1	2	1	1	2	1
1277	1	1	2	1	1	2	2	1	1	1	1	1	1	1	1	1	1	1	1	1	1	1	1	1	1	1	1	1	1	1	2	1	1	1	1	2	2	1
1278	1	2	1	1	1	2	2	2	1	1	1	1	1	2	1	2	1	2	1	1	1	2	1	2	1	2	2	1	2	1	1	1	2	1	2	1	2	2
1279	1	1	2	1	1	2	2	1	1	2	1	1	1	1	1	1	2	1	2	1	1	1	1	1	2	2	1	1	2	1	1	1	1	1	1	1	2	1
1280	1	1	2	1	1	2	2	1	1	1	1	1	1	1	1	1	2	1	1	2	1	1	2	1	1	1	1	1	1	2	1	2	1	1	1	1	2	1
1281	1	1	1	1	1	2	2	1	1	1	1	1	1	1	1	1	1	1	1	1	1	1	1	1	2	1	1	1	1	2	1	1	1	1	1	1	2	1
1282	1	1	2	1	2	2	2	1	1	1	1	1	1	1	1	1	1	1	1	1	1	1	2	1	2	2	2	1	2	2	1	1	1	1	2	1	2	1
1283	1	1	2	1	1	2	2	1	1	1	1	1	1	1	1	1	1	1	1	1	1	1	1	1	1	1	1	1	1	2	1	1	1	1	1	2	2	1
1284	1	1	2	1	1	2	1	1	1	1	1	1	1	1	1	1	1	1	1	1	1	1	1	1	1	1	1	1	1	2	1	1	1	1	1	1	1	1
1285	1	2	2	1	1	2	2	1	1	1	1	1	1	1	1	1	1	1	1	1	1	1	1	2	2	2	1	2	2	1	1	1	1	1	1	1	1	1
1286	1	2	2	1	1	2	2	1	1	1	1	1	1	2	1	1	1	2	1	1	2	2	2	1	2	2	2	1	2	1	2	1	1	1	1	1	1	1
1287	1	1	2	1	1	1	1	1	1	1	1	1	1	1	1	1	1	1	1	2	1	1	1	1	1	2	2	1	1	1	1	1	1	1	1	1	2	1
1288	1	2	2	1	2	2	2	1	1	1	1	1	1	2	1	1	2	2	1	1	1	1	1	1	2	2	2	1	2	1	1	1	1	2	2	2	2	2
1289	1	2	2	1	1	2	2	1	1	1	2	1	1	1	1	1	2	2	2	2	2	2	1	2	2	2	2	1	1	1	1	1	1	2	2	1	1	1
1290	1	1	2	1	1	2	1	1	1	1	1	1	1	1	1	1	1	1	2	2	1	1	1	1	2	1	1	1	1	1	1	1	2	1	1	1	1	1
1291	1	1	1	1	1	2	2	1	1	2	1	1	1	1	1	1	1	1	1	1	1	1	1	1	1	1	1	1	1	2	1	1	1	1	1	2	1	1
1292	1	2	1	1	1	2	1	1	1	1	1	1	1	2	1	1	1	1	2	1	1	1	1	1	1	2	2	2	2	1	1	1	1	1	1	1	1	1
1293	1	2	2	1	1	2	2	1	1	1	1	1	1	1	1	1	2	1	1	2	1	1	2	2	2	2	2	2	1	2	2	1	1	2	2	2	1	2
1294	1	1	2	1	1	2	2	1	1	1	1	1	1	1	1	1	1	1	2	2	1	1	1	1	1	2	1	1	1	1	2	1	2	1	1	2	2	1
1295	1	2	1	1	1	2	2	1	1	1	1	1	1	1	1	1	1	1	2	2	1	1	2	1	1	2	1	1	1	2	1	1	1	1	1	1	2	1
1296	1	1	2	1	1	2	2	1	1	1	1	1	1	1	1	1	1	1	2	2	1	2	2	2	2	2	2	1	2	2	1	1	1	1	1	1	1	1
1297	1	2	2	1	1	2	2	1	1	1	1	1	2	1	1	1	2	1	1	1	1	1	1	1	2	2	2	1	2	1	2	2	1	2	2	2	1	1
1298	1	1	2	1	1	2	1	1	1	1	1	1	1	1	1	1	1	1	2	2	1	1	1	2	2	1	1	1	1	2	1	2	1	2	1	1	1	2
1299	1	1	2	1	1	2	2	2	1	1	1	1	1	1	1	1	1	2	1	1	1	1	1	1	1	1	1	1	2	2	2	1	1	1	1	2	2	2
1300	1	1	2	1	1	2	1	1	1	1	1	1	1	1	1	1	1	1	1	1	1	1	1	1	2	1	1	1	1	1	1	1	1	1	1	1	1	1
1301	1	2	1	1	1	2	2	1	1	1	1	1	1	1	1	1	2	2	2	2	1	2	2	2	2	2	2	1	2	2	2	1	1	1	1	1	2	2
1302	1	2	2	1	1	2	2	1	2	1	1	1	1	1	1	1	2	2	1	1	1	2	2	2	2	2	2	2	2	1	1	1	1	2	2	1	1	1
1303	1	2	2	1	1	2	2	1	1	1	1	2	1	1	1	1	2	1	1	1	1	1	2	2	2	2	2	2	2	1	1	2	1	2	2	1	2	2
1304	1	1	2	1	1	2	1	1	1	1	1	1	1	1	1	1	1	1	1	1	1	2	2	2	2	1	1	1	2	2	1	1	1	2	1	2	1	2
1305	1	1	2	1	1	2	1	1	1	1	1	1	1	1	1	1	1	1	1	2	2	2	2	2	2	1	1	1	1	2	2	1	1	1	1	1	1	2
1306	1	1	1	1	1	2	1	2	1	1	1	1	1	1	1	1	1	1	1	1	1	1	1	1	1	2	1	1	1	2	1	1	1	1	1	1	2	1
1307	1	2	1	1	1	2	2	1	1	1	1	1	1	2	2	1	1	1	1	1	1	1	2	1	2	2	2	2	2	2	2	1	1	1	1	2	1	1
1308	1	2	2	2	1	2	2	1	1	1	2	2	1	2	1	1	2	2	2	2	1	2	2	1	2	2	2	1	2	1	1	1	1	2	2	1	2	2
1309	1	2	1	1	1	2	2	1	1	2	1	1	1	1	1	1	2	1	1	1	1	1	1	1	2	2	2	1	2	2	1	1	1	1	1	1	1	1
1310	1	1	1	1	1	2	2	1	1	1	1	1	1	1	1	1	2	1	2	1	1	1	2	2	2	2	2	1	1	2	1	2	1	2	2	2	1	2
1311	1	2	1	2	1	1	1	1	1	2	2	2	1	1	2	1	1	1	2	2	1	2	2	2	2	2	2	1	1	1	2	1	1	2	2	1	1	1
1312	1	1	2	1	1	2	2	1	1	1	1	1	1	1	1	1	1	1	1	1	1	1	1	1	1	1	1	1	1	1	1	1	1	1	1	1	2	1
1313	1	1	1	1	1	2	2	1	1	1	1	1	1	1	1	1	1	2	1	1	1	2	2	1	1	1	1	1	1	2	1	1	1	1	1	1	1	1
1314	1	1	2	1	1	2	2	1	1	1	1	1	1	1	1	1	1	1	2	2	1	1	1	1	1	1	1	1	2	1	1	1	1	1	1	1	1	1
1315	1	2	1	2	1	2	2	2	1	2	2	2	1	1	2	2	1	2	2	1	2	1	2	2	2	2	2	2	2	1	2	1	2	2	2	1	2	2
1316	1	2	2	1	1	2	2	1	1	1	1	1	1	1	1	1	1	1	2	1	1	1	2	2	2	2	2	1	2	1	1	1	1	2	2	2	1	1
1317	1	1	1	1	1	2	2	1	1	1	1	1	1	1	1	1	1	2	1	1	1	2	1	2	1	2	2	1	2	2	1	1	1	1	1	2	1	2
1318	1	2	2	1	1	2	2	1	1	1	1	1	2	2	2	1	1	1	1	1	1	1	2	1	2	2	2	2	2	2	1	2	2	2	2	2	2	2
1319	1	1	2	2	1	2	2	1	1	2	1	2	1	1	1	1	2	1	1	1	1	1	1	2	2	1	1	2	2	1	1	2	2	2	2	2	1	1
1320	1	1	2	1	1	2	2	1	1	1	1	1	1	1	1	1	1	1	2	2	1	1	1	1	1	1	1	1	1	1	1	1	2	1	1	1	1	1
1321	1	1	1	1	2	2	2	1	1	1	1	1	1	1	1	1	1	1	1	1	1	1	1	1	2	2	1	1	2	2	1	1	1	1	1	2	1	1
1322	1	1	2	1	1	2	2	1	1	1	1	1	1	1	1	1	1	1	1	1	1	1	1	1	2	1	1	1	1	2	1	1	1	1	1	1	2	2
1323	1	1	2	1	1	2	2	1	1	1	1	1	1	1	1	1	1	1	2	2	1	1	2	1	2	2	2	1	1	2	1	1	1	1	1	1	1	1
1324	1	1	2	1	1	2	2	1	1	1	1	1	1	1	1	1	1	1	2	2	1	1	1	2	2	2	1	1	1	1	1	2	1	1	1	2	1	2
1325	1	2	2	1	1	2	2	1	1	1	1	1	1	1	1	1	1	2	1	1	1	2	1	2	1	2	1	2	2	2	2	1	1	2	2	1	1	1
1326	1	1	1	1	1	2	2	1	1	1	1	1	1	1	1	1	2	1	1	1	2	1	1	1	1	2	2	1	1	1	1	1	1	1	1	1	2	2
1327	1	2	2	2	1	2	2	2	1	2	1	1	1	1	1	1	1	2	1	1	1	1	1	1	1	1	1	2	2	2	1	1	1	2	2	2	1	2
1328	1	2	2	1	1	2	1	1	1	1	1	1	1	1	1	1	2	2	2	1	1	1	1	1	2	1	1	1	2	2	1	1	2	1	1	2	1	1
1329	1	1	1	1	1	2	2	1	1	1	1	1	1	1	1	1	2	1	1	1	1	1	1	1	1	2	1	1	1	2	1	1	1	1	1	1	1	2
1330	1	1	2	1	1	2	1	1	1	1	1	1	1	1	1	1	1	1	1	2	2	2	2	1	2	1	1	1	2	2	2	1	1	2	1	2	1	1
1331	1	2	1	1	1	2	2	1	1	1	1	1	1	1	1	1	1	1	2	1	1	2	2	1	1	2	2	1	2	2	1	1	1	1	1	2	1	1
1332	1	1	1	1	1	2	2	1	1	1	1	1	1	1	1	1	1	1	1	1	2	1	1	1	1	1	1	2	1	2	1	1	2	1	1	1	2	1
1333	1	2	1	1	1	2	2	1	1	1	1	1	1	1	1	1	2	1	1	1	1	1	1	1	2	1	1	1	1	2	1	1	1	1	1	1	2	1
1334	1	1	1	1	2	2	2	1	2	1	1	1	1	1	1	1	1	1	1	1	1	1	1	1	1	2	1	1	1	2	1	2	1	1	1	1	2	1
1335	1	2	2	1	1	2	2	1	1	1	1	1	1	1	1	1	1	2	1	1	1	2	2	1	2	1	1	2	2	1	1	1	1	1	1	1	1	1
1336	1	2	2	1	1	2	2	2	2	1	1	1	1	1	1	1	1	1	2	1	1	1	1	1	1	1	1	1	1	2	1	1	2	1	1	2	2	1
1337	1	2	1	1	1	2	2	1	2	1	1	1	1	1	1	1	2	2	1	2	1	2	1	2	1	2	2	1	1	2	1	1	1	1	1	2	2	2
1338	1	1	1	1	1	2	2	1	1	1	1	1	1	1	1	1	1	1	1	1	2	2	2	2	2	1	1	1	2	2	1	1	1	1	1	1	1	2
1339	1	2	2	1	2	2	2	2	2	1	1	1	1	2	1	1	1	1	1	1	1	1	2	2	2	1	1	2	2	1	1	1	1	1	2	1	1	1
1340	1	1	1	1	2	2	2	1	2	1	1	1	1	1	1	1	1	1	1	1	1	1	2	2	2	2	2	1	1	2	1	1	1	1	1	2	2	1
1341	1	1	1	1	2	2	2	1	2	1	1	1	1	1	1	1	1	1	1	1	1	1	1	1	1	1	1	1	1	1	1	1	1	1	1	1	1	1
1342	1	2	2	2	1	2	2	1	1	2	2	1	1	1	1	1	1	1	1	1	1	1	1	1	2	1	1	1	2	1	1	1	1	1	2	1	2	2
1343	1	2	1	2	1	2	2	1	1	1	2	2	1	1	1	2	2	2	1	1	1	2	2	2	2	2	2	1	2	1	1	1	1	2	2	2	2	2
1344	1	1	2	1	2	2	2	2	2	1	1	1	1	1	1	1	1	1	2	2	2	1	1	2	2	2	1	1	1	1	1	1	1	1	1	1	2	1
1345	1	1	1	1	1	1	1	1	1	1	1	1	1	1	2	1	1	2	1	2	1	2	2	2	2	2	2	1	1	2	1	1	1	1	1	2	1	1
1346	1	1	2	1	1	2	2	1	1	1	1	1	1	1	1	1	1	2	1	1	1	1	2	2	2	2	2	1	2	2	1	1	1	2	1	1	2	2
1347	1	2	2	1	1	2	2	1	2	1	1	1	1	1	1	2	1	2	1	1	1	1	1	2	2	2	2	2	2	1	1	2	2	1	2	2	1	2
1348	1	2	2	1	1	2	2	2	1	1	1	1	1	1	1	1	1	1	2	1	1	1	1	1	2	2	2	2	1	2	1	1	1	1	1	2	2	1
1349	2	2	1	2	1	2	2	1	1	2	2	2	1	1	2	1	1	2	1	1	2	1	1	2	2	2	2	2	2	2	2	2	2	1	2	2	1	2
1350	1	1	2	1	2	2	2	1	1	1	1	1	1	1	1	1	1	1	1	1	1	1	1	1	2	1	1	1	2	1	1	1	1	1	1	2	1	1
1351	2	2	2	2	1	2	2	1	1	2	2	2	2	2	1	1	2	2	1	1	1	2	2	2	2	2	2	1	2	2	1	1	1	2	2	2	1	2
1352	1	2	2	1	1	2	2	1	2	1	1	1	1	2	1	1	1	2	1	1	1	2	1	2	1	1	1	1	1	1	1	1	1	2	1	1	2	1
1353	1	2	1	2	2	2	2	2	2	1	1	1	1	1	1	1	2	1	1	1	1	1	2	2	2	2	2	1	2	1	1	1	1	1	1	2	2	1
1354	1	1	2	2	1	1	2	1	1	1	1	2	1	1	1	1	1	2	2	1	1	1	1	1	2	2	2	2	2	2	2	1	1	2	2	1	1	1
1355	1	2	1	1	2	2	2	2	2	1	1	1	1	1	1	1	1	1	1	1	1	1	1	1	1	1	1	1	1	1	1	1	1	1	1	1	1	1
1356	1	2	1	1	1	2	2	2	2	1	1	1	1	1	1	1	1	1	1	1	2	1	1	1	2	1	1	2	1	2	1	1	1	1	1	1	2	2
1357	1	2	2	1	1	2	2	1	1	1	1	1	1	1	1	1	1	2	1	2	1	1	1	2	2	2	2	2	2	1	1	2	1	2	2	2	1	1
1358	1	2	1	1	2	2	2	1	2	1	1	1	1	1	2	1	1	1	2	2	1	1	1	1	2	1	1	1	1	2	1	1	1	1	1	1	1	1
1359	1	2	1	1	1	2	2	2	2	2	1	1	1	1	1	1	1	2	1	1	1	2	1	1	1	2	1	1	1	2	1	1	1	1	1	2	1	1
1360	1	2	2	2	1	2	2	1	1	1	2	2	1	1	2	1	2	2	2	2	1	2	2	2	2	2	1	2	2	1	1	1	2	2	2	2	1	2
1361	1	1	2	1	2	2	2	2	1	1	1	1	1	2	1	1	2	2	2	2	2	1	1	2	2	2	1	1	2	1	1	1	1	1	1	2	2	1
1362	1	1	2	1	1	2	2	1	1	1	1	1	1	1	1	1	1	1	1	2	2	1	2	1	2	1	1	1	1	2	1	1	1	1	1	2	1	2
1363	1	2	1	1	1	2	2	1	1	1	1	1	1	1	1	1	2	1	1	1	1	1	1	1	2	1	1	1	1	2	1	1	2	1	1	1	1	1
1364	1	1	1	1	2	2	2	2	2	2	1	1	1	1	1	1	1	1	1	1	1	1	2	1	2	2	2	1	1	2	2	1	1	1	1	2	2	1
1365	1	2	1	1	2	2	2	2	2	1	1	1	1	2	1	1	1	1	1	1	1	1	1	1	2	2	2	1	2	2	1	1	1	1	1	1	1	1
1366	1	1	1	1	1	2	2	1	1	1	1	1	1	1	1	1	1	1	1	1	2	2	2	2	2	1	1	1	1	2	2	2	2	1	1	1	2	2
1367	2	2	2	2	1	2	2	1	1	1	2	2	1	1	1	1	1	1	1	1	1	1	2	2	2	2	2	2	2	2	2	1	1	2	1	1	1	2
1368	1	1	2	1	2	2	2	1	2	1	2	1	1	1	1	1	1	1	1	1	1	1	1	2	2	1	1	1	1	1	1	1	1	1	1	2	1	1
1369	1	2	2	1	1	2	2	1	1	2	1	1	1	1	1	1	2	1	1	1	1	1	2	1	1	2	2	1	1	1	1	1	1	1	1	1	1	1
1370	1	2	1	1	1	2	2	1	1	1	1	1	1	1	1	1	1	1	1	1	1	1	2	2	2	2	2	1	1	2	2	1	1	1	1	1	2	1
1371	1	1	2	1	1	2	2	1	1	1	1	1	1	1	1	1	1	2	1	1	2	2	1	1	2	2	2	1	2	1	1	1	2	1	1	2	2	2
1372	1	2	1	1	2	2	2	1	2	1	1	1	1	1	1	1	2	1	1	1	1	1	1	1	1	1	1	1	1	2	1	1	1	1	1	2	1	1
1373	1	2	2	1	2	2	2	1	2	1	1	1	1	1	1	1	2	2	1	1	1	1	2	2	2	2	2	2	2	2	1	1	1	2	2	2	2	2
1374	1	1	1	1	1	2	2	1	1	1	1	1	1	1	1	1	1	1	1	1	1	1	1	1	2	1	1	1	1	2	1	1	1	1	1	1	1	1
1375	1	2	2	1	1	2	2	2	1	1	1	1	1	1	1	1	1	1	2	2	2	1	2	2	2	2	2	1	2	2	1	1	2	2	2	2	2	2
1376	1	1	2	1	1	2	2	1	1	1	1	1	1	1	1	1	1	1	1	1	1	1	2	1	1	1	1	1	1	2	1	1	1	1	1	1	2	1
1377	1	2	1	1	2	2	2	1	2	2	2	1	1	1	1	1	1	1	1	1	2	1	2	1	1	1	1	1	1	2	1	1	1	1	1	2	1	1
1378	1	2	2	1	1	2	2	2	1	1	1	1	1	1	1	1	1	1	1	1	1	1	1	2	2	2	1	2	2	2	1	1	1	2	2	1	1	2
1379	2	2	1	1	1	2	2	1	1	2	1	1	1	1	1	1	1	1	2	2	1	1	2	2	2	2	2	1	1	2	2	1	1	1	1	1	1	1
1380	1	1	2	1	2	2	2	1	2	1	1	1	1	1	1	1	1	2	2	2	1	1	1	1	1	1	1	1	1	1	1	1	1	1	1	1	1	1
1381	2	2	1	2	1	2	2	2	1	1	1	1	1	1	1	1	1	2	1	1	2	2	2	2	2	2	2	2	1	1	1	2	2	1	1	2	2	2
1382	1	2	1	1	2	2	2	2	2	1	1	1	1	1	1	1	1	2	2	2	2	2	1	1	2	1	1	1	1	2	2	1	1	1	1	1	2	1
1383	1	2	2	1	2	2	2	2	1	1	1	1	1	1	1	1	1	1	1	1	1	1	2	1	2	2	1	1	1	1	1	1	1	1	1	1	1	1
1384	1	1	2	1	1	2	2	1	2	1	1	1	1	1	1	1	1	1	1	1	1	1	2	1	2	2	1	1	1	1	1	1	1	1	1	2	2	1
1385	1	2	2	1	1	2	2	2	2	2	1	1	1	1	1	1	1	1	2	2	1	1	2	2	2	2	2	1	1	1	1	2	1	1	1	2	1	2
1386	1	1	2	1	1	2	2	1	1	1	1	1	1	1	2	1	1	1	1	2	1	1	2	2	2	2	2	1	1	2	2	1	1	2	1	2	2	2
1387	1	1	2	1	1	2	2	1	1	1	1	1	1	1	1	1	1	1	1	2	2	1	1	1	2	1	1	1	1	1	1	2	1	1	1	1	2	2
1388	1	1	1	1	1	2	2	1	1	2	2	1	1	1	1	1	1	1	2	2	1	1	1	1	1	1	1	1	1	2	1	1	1	1	1	1	1	1
1389	1	2	1	1	1	2	2	1	1	1	1	1	1	1	1	1	1	1	1	1	1	1	1	1	2	1	1	2	1	2	1	1	1	1	1	1	2	1
1390	1	1	1	1	1	2	2	1	1	1	1	1	1	1	1	1	1	1	1	2	1	1	1	1	1	1	1	1	2	2	1	1	1	1	1	1	2	2
1391	1	1	2	1	2	2	2	1	2	1	2	1	1	1	1	1	2	1	1	1	1	1	1	1	2	2	2	1	2	1	1	1	1	1	1	1	1	1
1392	1	2	2	1	1	2	2	2	1	1	1	1	1	1	1	1	1	2	1	2	1	2	1	2	2	2	1	2	2	2	2	2	2	1	1	1	1	1
1393	1	2	2	1	1	2	2	2	1	2	2	1	1	1	1	1	1	2	2	2	1	2	2	2	2	2	2	1	2	1	1	1	1	1	1	1	1	2
1394	1	1	1	1	1	2	2	1	1	1	1	1	1	1	1	1	1	2	1	1	1	2	2	1	2	2	1	1	1	2	1	1	1	1	1	1	2	2
1395	1	2	2	1	2	2	2	1	1	1	1	1	1	1	1	1	2	1	1	1	1	1	1	2	2	2	2	1	1	2	1	1	1	2	2	1	1	1
1396	1	1	1	1	1	2	1	1	1	1	1	1	1	1	1	1	2	1	1	1	1	1	2	1	2	2	2	1	2	2	2	1	1	1	1	2	1	2
1397	1	2	1	1	1	2	1	1	1	1	1	1	1	1	1	1	1	1	1	1	1	1	1	1	2	1	1	1	1	2	1	1	1	1	1	2	1	1
1398	1	1	1	1	2	2	2	1	2	1	1	1	1	1	1	1	1	1	1	1	1	1	1	1	1	1	1	1	1	2	1	1	1	1	1	2	1	1
1399	1	2	1	1	1	2	2	2	2	2	1	1	1	1	1	1	1	1	2	1	1	2	2	1	2	2	2	1	1	1	1	1	1	1	1	2	1	2
1400	1	2	1	1	1	2	2	1	1	1	1	1	1	1	1	1	2	1	1	1	1	1	1	1	1	1	1	1	1	1	1	1	1	1	1	1	2	1
1401	1	2	1	1	1	2	2	2	1	1	2	1	1	1	1	1	2	1	1	1	1	1	1	1	1	2	1	1	1	2	1	1	1	2	2	1	2	2
1402	1	1	2	1	1	2	2	2	2	2	1	1	1	2	1	1	2	1	1	2	1	1	1	2	2	2	2	1	2	2	1	1	1	2	1	1	1	2
1403	1	2	1	1	1	2	2	2	1	1	1	1	2	1	2	1	1	1	2	2	1	1	2	1	1	2	2	2	1	2	1	1	1	1	2	2	1	1
1404	1	1	2	1	2	2	2	1	1	1	1	1	1	1	1	1	1	2	2	1	1	2	2	1	2	1	1	1	1	1	1	1	1	1	1	2	1	1
1405	1	2	2	1	1	2	2	2	2	1	1	1	1	1	1	1	1	2	1	2	1	2	2	2	2	2	2	1	2	1	1	1	1	1	1	1	2	1
1406	1	1	1	1	1	1	1	1	1	1	1	1	1	1	1	1	1	1	1	1	1	1	1	1	2	2	2	1	1	2	2	1	1	1	1	1	2	1
1407	1	2	2	1	2	2	2	1	1	1	1	1	1	1	1	1	2	1	1	1	1	1	1	1	1	1	1	1	1	1	2	2	1	1	1	1	1	1
1408	1	2	1	1	1	2	2	1	1	1	1	1	1	1	1	1	1	1	2	2	1	1	1	1	2	2	2	1	2	2	1	2	2	1	1	1	1	1
1409	1	2	2	1	1	2	2	1	1	1	1	1	1	1	1	1	1	1	1	2	1	1	2	2	2	2	2	2	1	2	1	2	1	2	1	1	1	1
1410	1	1	2	1	1	2	2	1	1	1	1	1	1	1	1	1	1	1	1	1	1	1	1	1	1	1	1	1	1	2	1	2	2	1	1	1	1	1
1411	1	2	2	2	1	2	2	2	1	2	1	2	1	2	2	1	2	1	2	2	1	1	2	2	2	2	2	2	2	1	1	1	1	2	2	1	1	2
1412	1	2	2	2	2	2	2	2	2	1	2	1	1	1	1	1	2	2	2	1	2	1	2	2	2	2	2	1	2	1	1	1	2	2	1	2	2	1
1413	1	1	1	1	1	2	2	1	1	1	1	1	1	1	1	1	1	1	1	1	1	1	1	1	1	1	1	1	1	2	1	1	1	1	1	2	2	1
1414	1	1	2	1	1	2	2	2	2	1	1	1	1	1	1	1	1	1	1	1	2	1	2	2	2	2	2	1	1	2	2	1	2	1	1	2	2	1
1415	1	1	2	1	1	2	2	1	1	1	1	1	1	1	1	1	1	1	1	1	1	1	1	1	1	1	1	1	1	2	1	1	1	1	1	1	2	1
1416	1	1	2	1	1	2	2	1	1	1	1	1	1	1	1	1	1	1	1	1	2	1	1	1	2	2	2	2	1	1	1	1	1	1	1	1	1	1
1417	1	2	1	1	2	2	2	1	2	2	1	1	1	1	1	1	1	1	1	1	1	1	1	1	1	1	1	1	1	2	1	1	1	1	1	2	1	2
1418	1	2	2	1	1	2	2	1	1	1	1	1	1	2	1	1	1	2	1	1	1	1	2	2	2	2	2	2	2	2	1	1	1	2	2	1	2	2
1419	1	1	2	1	1	2	2	2	2	1	2	1	1	1	1	1	1	1	1	2	1	1	1	1	2	2	2	1	1	1	2	2	1	1	1	2	2	1
1420	1	1	2	1	1	2	2	1	1	1	1	1	1	1	1	1	1	1	2	2	1	1	1	1	1	1	1	1	1	1	1	1	1	1	1	1	1	1
1421	1	1	1	1	1	2	2	1	1	1	1	1	1	1	1	1	1	1	1	1	1	1	2	1	1	1	1	1	1	2	1	1	1	1	1	2	2	1
1422	1	1	1	1	1	2	2	1	1	2	1	1	1	1	2	1	1	1	2	2	2	1	1	1	1	2	2	1	1	2	1	1	1	1	1	2	2	1
1423	1	1	2	1	1	2	1	1	1	2	1	1	1	1	1	1	1	2	1	1	1	2	2	1	2	2	2	1	2	2	2	1	1	1	1	1	1	1
1424	1	2	1	1	1	2	2	1	1	1	1	1	1	1	1	1	1	1	1	1	1	1	1	1	2	1	1	1	1	2	1	1	1	1	1	2	1	2
1425	1	1	1	1	1	2	2	1	1	1	1	1	1	1	1	1	1	1	2	1	1	1	2	1	2	2	2	1	1	2	2	1	1	2	1	1	1	1
1426	1	2	2	2	1	2	2	2	2	1	2	2	1	1	1	1	2	2	2	2	2	2	2	2	2	2	2	2	2	1	1	2	1	2	2	1	2	2
1427	1	1	2	1	1	2	2	1	1	1	1	1	1	1	1	1	1	1	2	2	2	2	2	1	2	1	1	1	2	2	2	2	2	2	1	1	1	2
1428	2	2	2	2	1	2	2	1	1	1	2	2	2	1	1	2	2	2	1	2	1	2	2	2	2	2	2	2	2	2	2	2	2	2	2	2	2	2
1429	1	1	2	2	1	2	2	1	1	2	1	2	1	1	1	2	1	2	2	1	2	2	2	2	2	2	2	2	2	1	2	2	2	2	2	1	1	2
1430	1	2	1	1	2	2	1	2	1	1	1	1	1	1	1	1	1	1	2	1	1	1	1	1	2	2	1	1	1	1	1	1	1	2	2	2	2	1
1431	1	1	2	1	1	2	1	2	1	1	2	1	1	1	1	1	1	1	1	1	2	1	1	1	2	1	1	2	1	1	1	2	2	1	2	2	2	1
1432	1	2	2	1	1	2	2	2	2	1	1	1	1	2	1	1	1	1	1	1	1	1	1	1	2	1	1	2	2	1	2	1	1	1	2	2	2	1
1433	1	2	1	1	1	2	2	2	1	1	1	1	1	1	1	1	1	1	1	1	1	1	1	1	1	1	2	2	1	2	1	1	1	1	1	1	1	1
1434	1	1	2	2	2	2	2	2	2	1	2	2	1	2	1	1	2	1	1	1	2	1	2	2	2	1	1	1	2	1	1	1	1	2	2	1	1	2
1435	1	2	1	1	1	2	2	2	1	1	1	2	1	1	2	1	2	1	1	1	1	1	1	1	1	2	2	1	1	1	1	1	2	1	1	1	2	1
1436	1	2	2	1	2	2	2	2	1	1	1	1	1	1	1	1	2	1	2	2	1	1	1	1	2	1	1	1	1	2	1	1	1	1	1	2	1	2
1437	1	1	1	1	1	2	2	2	1	1	1	1	1	1	1	1	1	1	2	1	1	1	1	1	2	1	1	1	1	1	1	1	1	1	1	2	2	1
1438	1	2	2	1	1	2	2	2	1	1	1	1	1	1	1	1	2	1	1	1	1	1	2	2	2	2	2	1	2	1	1	1	1	1	1	1	2	2
1439	1	1	2	1	1	2	2	1	1	1	1	1	1	1	1	1	1	2	1	1	1	2	2	2	2	2	2	2	2	1	1	1	1	1	1	2	2	1
1440	1	2	1	1	2	2	2	1	1	1	1	1	1	1	1	1	2	1	1	1	1	1	2	1	2	2	2	1	1	2	2	1	1	1	1	2	2	1
1441	1	2	2	1	1	2	1	2	2	1	1	1	1	2	1	1	2	2	1	1	2	2	1	1	2	1	1	1	2	1	1	1	1	1	1	2	2	1
1442	1	2	1	1	1	1	1	2	1	2	1	1	1	1	2	1	1	2	2	2	2	2	2	2	2	2	2	2	2	2	1	1	1	2	2	2	2	2
1443	1	1	2	1	2	2	2	2	2	1	1	1	1	1	1	1	1	1	1	1	2	1	1	1	1	1	1	1	1	1	2	1	1	1	1	1	2	1
1444	1	2	2	1	1	2	1	2	1	1	1	1	2	2	1	1	1	2	1	1	1	2	2	1	2	1	1	1	2	1	2	1	1	2	2	1	1	1
1445	1	1	1	1	1	2	1	1	1	1	1	1	1	1	1	1	1	1	1	1	2	1	1	1	1	1	1	1	1	2	1	2	2	1	1	1	2	2
1446	1	1	2	1	1	2	2	2	2	2	1	2	1	1	1	1	1	2	1	1	2	2	2	2	2	2	2	2	2	2	1	1	1	2	2	2	1	1
1447	1	1	1	1	2	2	2	1	2	1	2	1	1	1	1	1	1	1	1	1	1	1	1	1	1	1	1	1	1	2	1	1	1	1	1	2	1	1
1448	1	1	1	1	1	2	2	1	1	1	1	1	1	1	1	1	1	1	1	1	1	1	1	1	1	1	1	1	1	2	1	1	1	1	1	2	1	1
1449	1	1	2	1	1	2	1	1	1	1	1	1	1	1	1	1	1	1	1	1	1	1	1	1	2	1	1	1	1	1	1	2	1	2	1	1	1	1
1450	1	2	2	1	2	2	2	2	2	1	1	1	1	1	1	1	1	1	1	1	2	1	1	2	2	1	1	1	1	2	1	1	1	1	1	1	2	1
1451	1	2	2	1	1	2	2	1	1	1	1	1	1	1	1	1	1	1	1	1	2	1	1	1	1	1	1	1	1	1	1	1	1	1	1	2	1	1
1452	1	2	2	1	2	2	2	2	1	1	1	1	1	1	1	1	1	1	1	1	1	1	1	1	2	1	1	2	2	1	2	1	1	2	2	1	1	1
1453	1	2	1	1	1	1	1	2	1	1	1	1	1	1	2	1	1	2	2	2	1	2	1	1	1	1	1	1	1	2	2	1	1	2	2	2	2	1
1454	1	2	1	1	2	2	2	2	1	2	1	1	1	1	1	1	1	1	1	2	2	1	1	1	2	1	1	1	1	1	2	1	1	1	1	1	1	1
1455	1	2	1	1	2	2	2	2	2	1	1	1	1	1	1	1	1	2	1	2	1	2	1	2	1	2	2	1	2	1	1	1	1	2	1	2	1	1
1456	1	1	2	1	1	2	2	2	2	1	2	1	1	1	1	1	1	1	1	1	1	1	1	1	2	1	1	1	1	1	1	1	1	2	1	1	1	1
1457	1	2	1	2	2	2	2	1	1	2	1	2	2	1	1	2	1	1	2	2	2	1	1	1	2	2	2	2	2	2	1	1	1	2	2	2	1	1
1458	1	1	2	1	1	2	2	1	1	1	1	1	1	1	1	1	1	1	1	1	2	2	2	2	2	2	2	1	1	2	1	1	1	2	1	1	1	2
1459	1	2	1	1	1	2	2	2	1	2	1	1	1	2	1	1	1	1	1	1	2	1	2	2	2	2	1	2	1	2	2	1	2	2	2	2	2	2
1460	1	1	2	1	1	2	2	1	1	1	1	1	1	1	1	1	1	1	2	2	2	1	1	1	2	2	2	1	2	1	2	2	2	1	1	2	2	1
1461	1	1	2	1	2	2	2	2	1	1	1	1	1	1	1	1	1	1	1	1	1	2	2	1	1	1	1	1	1	1	1	1	1	1	1	1	2	1
1462	1	1	1	1	1	2	2	1	2	2	1	1	1	1	1	1	1	1	1	1	1	1	2	2	1	1	1	1	1	1	1	1	1	1	1	2	2	1
1463	1	1	1	1	2	2	2	1	1	1	1	1	1	1	1	1	1	1	1	1	1	1	1	1	1	1	1	1	1	2	1	1	1	1	1	1	2	1
1464	1	2	1	1	2	2	2	2	2	1	1	1	1	1	1	1	2	1	2	2	2	1	2	2	2	1	1	2	2	1	1	1	1	1	1	2	2	2
1465	1	2	2	1	1	2	2	1	1	1	1	1	1	1	2	1	1	2	2	2	1	2	2	2	2	2	2	2	2	2	2	2	2	2	2	1	1	1
1466	1	2	1	1	1	2	2	1	1	1	1	1	1	1	1	1	1	2	2	2	1	2	2	1	1	1	1	1	1	2	2	1	1	2	1	1	2	1
1467	1	2	2	1	1	2	2	1	1	2	1	1	1	1	1	1	1	1	1	1	1	1	1	1	1	2	1	1	1	2	1	1	1	1	1	1	1	1
1468	1	2	1	1	2	2	2	1	1	1	1	1	1	1	1	1	2	1	1	1	1	1	1	1	1	1	1	1	1	2	1	1	1	1	1	2	1	1
1469	1	2	2	1	1	2	2	1	1	1	1	1	1	1	1	1	1	1	1	1	1	1	1	1	1	2	2	1	1	1	1	1	1	1	1	1	1	1
1470	1	2	2	1	1	2	2	1	1	1	1	1	2	1	1	1	1	2	1	1	1	2	2	2	2	2	2	2	2	2	1	1	1	1	1	2	1	1
1471	1	2	1	1	1	2	2	1	1	1	1	1	1	1	2	1	1	1	2	2	1	1	1	1	1	1	1	1	2	1	1	1	1	1	1	1	1	1
1472	1	2	2	1	1	2	2	2	1	2	1	1	1	1	1	1	1	1	1	1	2	1	2	2	2	2	2	1	2	2	1	1	1	1	1	1	1	2
1473	1	2	1	1	1	2	2	1	1	1	1	1	1	1	1	1	1	2	1	1	1	2	1	2	1	2	2	1	2	2	1	1	1	1	1	1	2	2
1474	1	1	2	1	2	2	2	2	2	2	1	1	1	1	1	1	1	1	2	2	2	1	1	1	1	1	1	1	1	1	2	2	1	1	1	1	1	1
1475	1	2	2	1	1	2	2	1	1	1	1	1	1	1	1	1	1	2	2	1	1	1	1	2	1	2	2	1	1	2	1	1	1	1	1	2	2	2
1476	1	2	2	1	2	2	2	1	1	1	1	1	1	1	1	1	1	2	1	1	1	2	2	1	2	1	1	1	2	2	2	1	1	1	1	1	1	1
1477	1	2	1	1	1	2	2	2	1	1	1	1	1	1	1	1	2	2	2	2	1	2	1	2	1	2	2	1	1	1	1	1	1	1	1	1	1	1
1478	1	2	2	1	1	2	2	1	2	2	1	1	1	2	1	1	1	2	1	1	2	2	1	2	2	2	2	1	2	2	2	1	1	1	2	1	2	2
1479	1	2	2	1	2	2	2	1	1	1	1	1	1	1	1	1	1	1	1	1	1	1	1	1	2	1	1	1	1	2	2	1	1	1	2	2	2	1
1480	1	1	1	1	1	2	1	1	1	1	1	1	1	1	1	1	2	1	1	1	1	1	1	2	2	2	2	1	2	2	1	1	1	1	1	2	1	1
1481	1	2	2	1	1	2	2	1	1	1	2	1	1	1	1	1	2	2	1	1	1	2	2	2	2	2	2	2	1	1	2	1	2	2	2	2	1	1
1482	1	2	1	1	1	2	2	1	1	1	1	1	1	1	1	1	1	2	2	2	1	2	1	1	2	1	1	2	2	2	1	1	1	1	1	1	1	1
1483	1	1	2	1	2	2	2	2	1	1	1	1	1	1	1	1	1	2	1	1	1	2	2	1	2	2	2	1	1	1	1	1	1	1	1	1	2	1
1484	1	2	1	1	1	2	2	1	1	1	1	1	1	1	1	1	1	1	1	1	1	1	1	1	1	1	1	1	1	2	1	1	1	1	1	1	2	1
1485	1	2	1	1	1	2	2	1	1	1	2	1	1	1	2	1	2	2	1	1	2	2	2	2	2	2	2	2	1	2	2	1	1	1	2	1	1	1
1486	1	2	1	1	2	2	2	1	1	1	1	1	1	1	1	1	1	1	1	1	1	1	1	1	2	1	1	1	1	1	1	1	1	1	1	1	1	1
1487	1	2	2	1	1	2	2	1	2	1	2	2	1	1	2	1	1	2	2	2	2	2	2	2	2	2	2	2	2	2	1	1	1	2	2	2	2	2
1488	1	1	2	1	1	2	2	1	1	2	1	1	1	1	1	1	1	1	1	2	1	1	1	1	1	2	2	1	1	1	1	1	1	1	1	1	1	1
1489	1	1	2	1	1	2	1	1	1	1	1	1	1	1	1	1	1	1	1	1	1	1	1	1	2	2	2	1	1	2	1	1	2	1	1	1	1	1
1490	1	1	1	1	2	2	2	2	2	2	1	1	1	1	1	1	1	1	1	1	1	1	1	1	1	1	1	1	2	2	1	1	1	1	1	2	1	1
1491	1	2	1	1	2	2	2	1	2	1	1	1	1	1	1	1	1	1	1	1	1	2	2	1	2	2	2	1	1	1	1	1	1	1	1	2	1	1
1492	1	1	2	1	1	2	2	1	1	1	1	1	1	1	1	1	1	1	1	2	1	1	2	1	1	1	1	1	1	1	1	1	1	1	1	1	2	1
1493	1	2	2	1	2	2	2	1	1	1	1	1	1	1	2	1	2	1	2	2	2	1	1	1	1	2	1	2	2	2	1	2	1	2	2	2	1	1
1494	1	1	2	1	1	2	2	1	1	2	1	1	1	1	1	1	1	1	1	2	2	1	1	1	1	1	1	2	1	2	1	2	1	1	1	1	1	2
1495	1	1	1	1	1	2	2	1	1	1	1	1	1	1	1	1	1	1	2	1	1	1	1	1	1	1	1	1	1	2	1	1	1	1	1	1	1	1
1496	1	1	1	1	1	2	2	1	1	1	1	1	1	1	1	1	1	1	1	2	1	1	1	1	1	1	1	1	1	1	1	1	1	1	1	1	2	1
1497	1	1	1	1	2	2	2	1	1	2	1	1	1	1	1	1	1	2	1	1	1	1	2	2	2	2	2	1	1	1	1	1	1	2	1	2	2	1
1498	1	1	1	1	1	2	2	1	1	1	1	1	1	1	1	1	1	2	1	1	2	2	2	1	2	2	2	1	1	2	1	1	2	2	1	2	1	1
1499	1	1	2	1	1	2	2	1	1	2	1	1	1	1	1	1	1	2	1	1	1	2	1	1	2	1	1	1	1	2	1	1	1	1	1	1	1	1
1500	1	2	2	1	1	2	2	1	2	1	1	1	1	1	1	1	2	1	1	1	1	1	1	1	1	1	1	1	1	2	1	1	1	1	1	1	2	2
1501	1	2	2	1	1	2	2	2	1	2	1	1	1	1	1	1	1	2	2	2	1	2	2	2	2	2	2	2	2	1	1	1	2	2	2	2	2	2
1502	1	1	2	1	1	2	2	1	1	1	2	1	1	1	2	1	1	1	2	2	1	1	1	1	2	1	1	2	2	2	1	1	1	2	1	2	1	2
1503	1	1	2	1	1	2	2	1	1	1	1	1	1	1	1	1	1	1	1	1	1	1	1	1	1	1	1	1	1	2	1	1	1	1	1	1	1	1
1504	1	2	1	1	1	2	2	1	1	2	1	1	1	1	1	1	1	1	2	2	2	1	2	2	2	2	2	1	2	2	1	2	2	2	1	1	1	1
1505	1	2	1	1	1	2	2	2	1	1	1	1	1	2	1	1	2	1	2	2	1	1	2	2	2	1	1	2	1	1	1	1	1	1	1	2	1	2
1506	1	2	1	1	1	2	2	2	1	1	1	1	1	2	1	1	1	2	2	2	2	2	2	2	2	2	2	1	2	2	2	1	1	2	1	1	1	1
1507	1	2	1	1	1	2	2	2	1	1	1	1	1	1	1	1	1	2	2	2	2	2	2	2	2	2	2	2	2	2	1	1	1	2	2	2	1	1
1508	1	1	2	1	2	2	2	2	2	1	1	1	1	1	1	1	1	1	1	1	1	1	1	2	2	1	2	1	2	2	1	1	1	2	2	2	1	1
1509	1	2	1	1	1	2	2	1	1	1	1	1	1	1	1	1	1	2	1	1	1	2	2	1	2	1	1	1	2	2	1	1	1	1	1	2	2	1
1510	1	2	1	2	1	2	2	1	2	1	1	2	1	1	1	1	2	2	2	2	1	2	1	1	2	2	2	2	2	1	1	1	1	1	1	1	2	2
1511	1	2	1	1	1	2	2	1	1	2	1	1	1	2	2	1	1	1	2	1	1	1	1	2	2	2	2	1	1	2	2	1	1	1	1	2	2	1
1512	1	2	1	1	1	2	2	2	1	2	1	1	1	1	1	1	1	1	1	1	2	1	1	1	2	2	2	1	1	2	2	2	2	2	1	2	2	1
1513	1	2	2	1	1	2	2	1	1	1	1	1	1	1	1	1	1	2	1	1	1	2	2	2	2	1	1	2	1	2	2	1	1	2	2	2	2	1
1514	1	2	2	1	2	2	2	1	1	1	1	1	1	1	1	1	1	1	1	1	2	1	1	1	2	2	2	1	1	1	1	1	1	2	1	1	1	1
1515	1	2	1	1	1	2	2	1	1	1	1	1	1	1	1	1	1	1	1	1	1	1	1	1	1	2	1	1	1	1	1	1	1	1	1	1	1	1
1516	1	2	2	1	1	1	1	1	1	1	1	1	2	2	2	1	2	1	1	2	1	1	2	2	2	1	1	2	2	1	1	1	1	2	2	2	2	1
1517	1	2	1	2	1	2	2	1	1	2	1	1	1	2	1	1	1	1	1	1	1	1	1	1	2	2	2	1	1	2	1	1	1	2	2	1	2	1
1518	1	2	1	1	2	2	2	1	2	1	1	1	1	1	2	1	1	1	2	2	1	1	1	2	2	2	2	1	1	1	1	1	1	2	1	2	2	1
1519	1	2	2	1	1	2	2	1	1	1	1	1	1	1	1	1	1	1	1	1	1	2	2	2	2	2	2	2	2	1	2	2	1	2	2	2	2	2
1520	1	2	2	1	1	2	2	1	1	1	2	1	1	1	1	1	1	2	1	1	1	2	1	1	2	2	2	1	1	2	1	1	1	1	1	1	2	1
1521	1	1	1	1	1	2	2	1	1	2	1	1	1	1	1	1	1	1	1	1	1	1	1	1	1	2	2	1	1	2	1	1	1	1	1	1	2	2
1522	1	2	2	2	1	1	2	1	1	2	1	2	1	1	1	1	2	2	2	2	1	2	2	2	2	2	2	2	2	1	1	1	2	2	2	2	2	2
1523	1	2	1	1	1	2	2	1	1	2	1	1	1	1	1	1	1	2	1	1	1	2	2	2	2	2	2	1	2	2	2	1	2	2	1	2	2	2
1524	1	2	2	1	1	2	2	1	1	1	1	1	1	2	1	1	1	1	2	2	1	1	1	1	1	1	1	1	1	1	1	1	1	2	2	1	2	1
1525	1	2	2	1	1	2	2	2	1	2	1	1	2	1	2	1	1	2	2	2	1	2	2	2	2	2	2	2	1	1	2	1	1	2	2	2	2	1
1526	1	2	1	1	1	2	2	1	1	2	1	1	1	1	1	1	1	2	1	1	1	2	2	2	2	1	1	1	2	2	1	1	1	2	2	1	2	1
1527	1	1	1	1	1	2	2	1	1	1	1	1	1	1	1	1	1	1	1	1	1	1	1	1	1	1	1	1	1	2	1	1	1	1	1	1	2	1
1528	1	1	1	1	2	2	2	1	1	1	1	1	1	1	1	1	1	2	2	2	1	2	1	2	2	1	1	1	2	2	2	1	1	1	1	1	1	1
1529	1	2	2	1	1	2	2	1	1	2	1	2	1	1	1	1	1	2	1	1	1	1	2	2	2	2	2	1	2	2	2	1	1	1	1	1	2	2
1530	1	2	1	1	1	2	1	1	2	2	1	1	1	1	1	1	2	2	1	1	1	2	1	1	2	2	2	1	2	1	1	1	1	2	1	2	2	1
1531	1	1	2	2	1	2	2	1	1	2	1	1	1	1	1	1	1	2	2	2	2	1	2	2	2	2	2	2	2	2	2	1	2	2	2	1	2	2
1532	1	2	2	1	1	2	2	1	1	2	1	1	1	1	1	1	2	2	1	1	1	1	1	2	2	2	2	1	1	2	1	1	1	2	1	2	2	1
1533	1	2	1	1	1	2	2	1	1	2	1	1	2	1	1	1	1	1	2	2	1	1	1	1	2	2	2	2	1	1	1	1	1	2	2	1	2	1
1534	1	2	2	1	1	2	2	1	1	1	1	1	1	1	1	1	2	2	1	2	1	2	2	1	2	1	1	1	2	2	1	1	1	1	1	1	2	2
1535	1	2	2	1	1	2	2	1	1	2	1	1	1	1	1	1	1	1	1	1	1	1	1	1	2	1	1	1	1	1	1	1	1	2	1	1	1	1
1536	1	1	1	1	1	2	2	1	2	1	1	1	1	1	1	1	1	1	1	2	2	1	1	1	2	2	2	1	1	2	2	1	1	1	2	1	1	1
1537	1	1	2	1	1	2	2	1	1	1	1	1	1	1	1	1	1	2	2	2	2	2	2	1	2	1	1	1	2	2	1	1	1	1	1	1	1	1
1538	1	1	1	1	1	2	2	2	1	1	1	1	1	1	1	1	1	1	1	1	1	1	1	1	1	1	1	1	2	2	1	2	2	1	1	1	1	1
1539	1	1	2	1	1	2	1	1	1	1	1	1	1	1	1	1	2	1	1	1	1	1	1	1	2	1	1	1	2	1	1	1	1	1	1	1	1	1
1540	1	2	2	1	1	2	2	1	1	1	1	1	1	2	1	1	1	2	1	1	1	1	1	2	2	1	1	1	1	1	1	1	1	1	1	1	1	1
1541	1	2	2	1	1	2	2	1	1	1	1	1	1	1	1	1	1	2	1	1	2	2	1	1	1	2	2	2	1	1	2	1	1	2	2	1	2	2
1542	1	1	1	1	1	2	2	1	1	1	1	1	1	1	1	1	1	2	2	1	1	1	1	1	1	2	1	1	1	2	1	1	2	1	1	2	2	1
1543	1	2	1	1	1	2	2	1	1	1	2	1	1	1	2	1	2	1	2	1	1	1	1	2	2	1	1	1	1	2	2	1	2	2	1	2	2	2
1544	1	2	1	1	1	2	1	1	1	1	1	1	1	1	1	1	1	2	1	1	1	1	2	2	2	2	2	1	1	2	1	1	1	1	1	2	2	1
1545	1	1	2	2	2	2	2	1	1	2	2	1	2	1	2	1	1	1	1	1	2	1	2	2	2	2	2	2	2	2	1	1	2	1	1	2	2	2
1546	1	2	2	1	2	2	1	1	1	1	1	1	1	1	1	1	1	2	1	1	1	2	1	2	2	1	1	1	1	1	1	1	1	2	2	2	2	1
1547	1	2	2	1	1	2	2	1	1	1	1	1	1	2	1	1	1	1	2	1	1	1	1	1	2	1	1	2	1	1	2	2	2	2	2	2	2	2
1548	1	2	1	1	1	2	2	1	1	2	1	1	1	2	1	1	1	2	1	1	2	2	2	2	2	2	2	2	2	2	2	1	1	2	2	2	2	2
1549	1	2	2	1	1	2	2	1	1	1	1	1	1	2	2	1	1	1	2	2	1	1	2	1	2	1	1	2	2	2	2	1	1	1	2	1	2	1
1550	1	1	1	1	1	2	2	2	2	2	1	1	1	1	1	1	1	2	1	1	1	1	1	2	2	2	2	1	1	2	2	1	1	2	1	1	2	1
1551	1	1	2	1	1	2	2	1	1	1	1	1	1	1	2	1	1	1	2	2	1	1	2	2	2	2	2	2	1	2	1	1	1	2	2	2	2	2
1552	1	2	2	1	1	2	2	1	1	2	1	1	1	2	1	1	2	1	2	2	1	1	1	2	2	1	1	2	1	2	1	1	1	2	1	1	2	1
1553	1	2	2	2	1	2	2	1	1	2	2	1	1	1	1	1	1	1	2	2	2	1	2	2	2	2	2	2	2	2	1	2	2	2	2	2	2	2
1554	1	1	1	1	1	2	2	1	1	1	1	1	1	1	1	1	1	2	1	1	1	2	1	2	2	2	2	1	1	2	1	1	1	1	1	2	2	1
1555	1	2	1	2	2	2	2	1	1	2	1	2	1	1	2	1	1	2	2	2	2	2	2	1	2	2	2	2	2	1	2	1	1	1	2	1	2	1
1556	1	2	2	2	1	2	1	1	1	2	2	1	1	1	1	1	1	1	1	1	1	1	2	2	2	2	2	1	1	1	1	1	2	2	2	2	2	1
1557	1	1	2	1	1	2	2	1	1	1	1	1	1	1	1	1	1	1	1	1	1	1	2	2	2	2	2	1	2	1	1	1	1	2	2	1	2	2
1558	1	1	2	2	1	1	1	1	1	1	1	1	1	1	1	1	1	1	1	1	1	1	1	1	1	1	1	1	2	2	2	2	2	2	2	1	1	1
1559	1	2	2	1	1	2	2	1	1	1	1	1	1	2	1	1	1	1	2	1	1	1	2	2	2	2	2	2	2	1	1	2	2	2	2	2	2	2
1560	1	1	2	1	1	2	2	1	1	2	1	1	1	1	1	1	1	1	1	1	1	1	1	1	1	2	1	1	2	2	1	1	1	1	1	1	2	1
1561	1	2	2	2	1	2	2	1	1	2	1	2	1	1	1	1	2	1	1	1	1	1	1	1	2	2	2	1	1	2	2	1	1	2	2	2	2	2
1562	1	2	1	1	1	1	1	1	1	2	1	2	1	1	1	1	2	1	2	2	1	1	2	2	2	2	2	2	2	1	1	1	1	2	2	1	2	2
1563	1	1	2	1	1	2	2	1	1	2	1	1	1	1	1	1	1	2	2	1	2	2	1	2	2	2	1	1	1	2	2	1	1	2	1	2	2	2
1564	1	2	2	1	1	2	2	1	1	2	1	1	1	1	1	1	1	2	2	2	2	2	2	2	2	2	2	2	2	1	1	1	1	2	2	2	2	2
1565	1	2	1	1	1	2	2	1	1	1	1	1	1	1	1	1	1	1	1	2	1	1	1	1	1	2	2	1	1	2	2	2	2	1	1	1	2	2
1566	1	1	1	1	1	2	2	1	1	1	1	1	1	1	1	1	1	1	1	1	1	1	1	1	2	1	1	1	1	2	1	1	1	1	1	1	2	1
1567	1	1	2	1	1	2	2	1	1	1	1	1	1	1	1	1	1	1	2	2	1	1	1	1	1	2	1	1	1	2	1	1	1	1	1	1	2	1
1568	1	2	1	1	1	2	2	1	1	1	1	1	1	1	1	1	1	1	1	2	1	1	1	1	1	1	1	1	1	2	2	1	1	2	1	1	1	1
1569	1	1	2	1	1	2	2	1	1	1	1	1	1	1	1	1	1	2	1	2	1	2	2	1	2	2	2	2	2	1	1	1	1	2	1	1	2	2
1570	1	1	2	1	1	2	2	1	1	2	1	1	1	1	1	1	1	2	1	1	1	2	2	1	2	2	2	2	2	1	1	1	1	1	2	2	2	2
1571	1	2	1	1	1	2	1	1	2	2	1	1	1	1	1	1	1	1	2	2	2	1	2	1	1	1	1	1	1	2	2	1	1	2	2	2	2	2
1572	1	2	2	1	1	2	2	1	1	2	1	1	1	1	1	1	1	1	2	2	1	2	2	2	2	2	2	2	2	1	1	1	1	2	2	2	2	2
1573	1	2	2	1	1	2	2	1	1	1	2	1	1	1	1	1	2	1	2	2	2	1	2	2	2	2	2	1	2	2	2	1	1	2	2	2	2	2
1574	1	2	2	1	1	2	2	1	1	1	1	1	1	2	1	1	1	1	1	1	1	1	2	2	2	2	2	1	2	1	2	1	1	2	2	2	2	2
1575	1	2	1	1	1	2	2	1	1	1	1	1	1	1	1	1	1	1	2	2	2	1	2	2	2	2	2	1	2	2	2	1	1	2	2	2	2	2
1576	1	1	1	1	1	2	2	1	1	2	1	1	1	1	1	1	1	1	2	2	1	1	2	1	1	1	1	2	1	2	1	1	1	1	1	1	2	1
1577	1	2	2	1	1	2	2	1	1	2	2	1	1	1	1	1	1	1	1	1	1	1	2	1	1	2	2	2	1	1	1	2	2	1	1	1	2	2
1578	1	2	1	1	1	2	2	1	1	2	1	1	1	1	1	1	1	1	1	1	1	1	1	1	1	2	1	2	1	1	1	1	1	1	1	2	2	1
1579	1	1	1	1	2	2	2	1	2	2	2	1	1	1	1	1	1	1	1	1	2	1	2	2	2	2	2	1	2	2	1	1	1	2	2	2	2	2
1580	1	1	2	1	1	2	2	2	1	1	1	1	1	1	1	1	1	1	1	1	1	1	2	2	2	1	1	1	2	2	1	2	2	1	1	2	2	2
1581	1	2	2	1	2	2	1	1	1	2	1	1	1	1	1	1	1	1	1	2	1	1	2	2	2	2	2	2	1	1	1	1	1	1	1	2	2	1
1582	1	1	2	1	1	2	2	1	1	2	1	1	1	1	2	1	1	1	2	2	1	1	2	2	2	2	2	1	1	1	1	1	1	2	1	1	2	2
1583	1	1	1	1	2	2	2	1	1	1	1	1	1	1	1	1	1	2	1	1	1	1	1	1	2	2	2	1	1	2	1	1	1	1	1	1	2	1
1584	1	1	1	1	1	2	2	1	1	1	1	1	1	1	1	1	1	1	1	1	1	1	1	1	2	1	1	1	1	2	1	1	1	1	1	2	2	1
1585	1	2	2	1	1	2	2	1	1	1	2	1	1	1	1	1	1	1	1	1	1	1	2	2	2	1	1	2	1	1	2	2	2	2	2	2	2	2
1586	1	1	2	1	1	2	2	1	1	1	1	1	1	1	1	1	2	1	2	1	1	1	2	1	2	2	2	1	2	2	2	1	1	2	2	2	2	2
1587	1	1	2	1	2	2	2	1	2	1	1	1	1	1	1	1	1	1	2	2	2	1	1	2	2	2	2	1	1	1	1	1	1	2	1	2	2	1
1588	1	2	2	1	2	2	2	1	2	1	1	1	1	1	1	1	1	1	1	2	1	1	1	2	2	2	1	2	1	1	2	2	2	1	1	1	1	1
1589	1	1	2	1	1	2	2	1	2	1	1	1	1	1	1	1	1	1	1	1	1	1	1	1	1	2	2	1	1	2	1	1	1	1	1	2	2	1
1590	1	2	1	1	1	2	2	1	2	1	1	1	1	1	2	1	2	1	2	2	2	1	2	1	2	1	1	1	1	2	2	1	1	1	1	1	2	1
1591	1	1	1	1	1	1	1	1	1	1	1	1	1	1	1	1	1	2	2	2	2	1	2	2	2	2	2	1	1	2	2	1	1	1	1	1	1	1
1592	1	2	2	1	1	2	2	1	1	2	1	1	1	1	1	1	1	1	1	1	2	1	1	1	1	1	1	2	1	2	1	2	1	1	2	1	2	2
1593	1	2	2	1	2	2	2	1	1	2	1	1	1	1	2	1	1	1	2	2	2	1	2	1	2	2	2	1	2	1	1	1	2	2	1	2	2	2
1594	1	1	2	1	1	2	2	1	1	1	1	1	1	1	1	1	1	1	1	2	1	1	2	1	1	1	1	1	1	1	1	1	1	1	1	2	2	1
1595	1	2	1	1	1	2	2	1	1	1	1	1	1	1	1	1	1	1	2	2	2	1	1	1	1	2	2	2	1	1	2	1	1	1	1	2	2	2
1596	1	1	1	1	1	2	2	1	1	1	1	1	1	1	1	1	1	2	1	1	1	2	2	2	2	1	1	2	1	2	2	1	1	2	1	2	2	1
1597	1	2	2	1	1	2	2	1	1	1	1	1	1	1	1	1	1	1	2	2	2	1	1	1	2	2	2	1	2	1	1	2	2	1	1	1	1	1
1598	1	1	1	1	1	2	2	1	1	1	2	1	1	1	1	1	1	1	1	1	1	1	1	1	2	1	1	1	1	2	1	1	1	1	1	1	2	1
1599	1	2	1	1	1	2	2	2	1	1	1	1	1	2	2	1	1	2	2	2	2	1	1	2	2	2	2	1	1	2	1	1	1	1	2	1	2	1
1600	1	2	2	1	1	2	2	1	1	1	2	1	1	2	1	1	1	1	1	1	1	2	2	1	2	2	2	1	1	1	1	1	1	2	1	1	2	1
1601	1	1	1	1	1	2	2	1	1	1	1	1	1	1	1	1	1	2	2	1	1	2	2	1	2	1	1	1	1	1	1	1	1	1	1	1	1	1
1602	1	1	2	1	1	2	2	1	1	1	2	1	1	1	1	1	2	1	1	1	1	1	2	2	2	2	2	1	1	1	1	1	1	1	1	2	2	2
1603	1	1	1	1	2	2	1	1	1	1	1	1	1	1	1	1	1	1	2	1	1	1	2	1	1	2	2	1	1	2	1	1	1	1	1	1	1	1
1604	1	1	2	1	1	2	2	1	1	1	1	1	1	1	1	1	2	2	1	1	1	1	2	2	2	2	2	1	2	2	1	1	1	2	1	2	2	1
1605	1	2	2	1	1	2	2	1	1	1	1	1	1	1	1	1	1	1	1	2	1	1	1	1	2	1	1	1	1	1	1	1	1	1	1	1	2	2
1606	1	2	2	2	1	2	2	1	1	1	1	1	2	1	2	1	1	2	1	1	2	2	2	2	2	1	2	1	2	1	1	2	1	2	2	2	2	2
1607	1	1	1	1	1	2	1	1	1	2	1	1	1	1	2	1	1	2	1	2	1	2	1	2	2	2	2	1	1	1	1	1	1	1	1	1	2	1
1608	1	1	2	1	1	2	2	1	1	2	1	1	1	1	1	1	1	2	1	1	1	2	2	2	2	2	2	1	1	1	1	2	1	1	1	2	2	1
1609	1	2	2	1	1	2	2	1	1	1	1	1	1	1	1	1	1	1	1	1	1	1	1	1	2	1	1	1	1	1	1	1	1	2	1	2	2	1
1610	1	1	1	1	1	2	2	1	1	1	1	1	1	1	1	1	1	1	1	1	1	2	2	1	2	1	1	1	1	2	1	1	2	1	1	2	2	1
1611	1	2	1	2	1	2	2	1	1	1	1	1	1	2	2	1	1	1	2	1	1	1	1	2	2	1	1	2	2	2	2	1	1	2	2	1	1	1
1612	1	2	1	1	1	2	2	1	1	1	1	1	1	1	1	1	1	1	1	1	1	1	1	1	1	2	2	1	1	2	1	2	1	2	1	2	2	1
1613	1	2	1	1	1	2	2	1	1	1	1	1	1	1	1	1	1	2	2	2	2	1	2	2	2	2	2	1	2	1	1	1	2	2	1	2	2	2
1614	1	2	2	1	1	1	1	1	2	1	1	1	1	1	1	1	1	1	1	1	1	1	1	2	2	2	1	1	2	1	1	1	2	1	1	2	2	2
1615	1	1	1	1	1	2	2	2	1	1	1	1	1	1	1	1	1	2	1	1	1	1	1	1	1	2	2	1	2	2	1	1	1	2	1	1	1	1
1616	1	2	2	1	1	2	2	1	1	1	1	1	1	1	1	1	1	2	2	1	2	1	1	2	2	1	1	1	1	1	1	1	1	2	1	1	1	1
1617	1	1	1	1	1	2	2	1	2	1	1	1	1	1	1	1	1	1	1	1	1	1	2	2	2	2	1	1	1	2	1	1	1	2	2	1	2	2
1618	1	2	1	1	1	2	1	1	1	1	1	1	1	1	1	1	1	1	1	1	1	1	1	1	2	1	1	1	1	2	1	1	1	1	1	1	2	1
1619	1	1	2	1	1	2	1	1	1	1	2	1	1	1	1	1	1	2	1	1	1	2	2	1	2	1	1	1	1	1	1	1	1	1	1	1	2	1
1620	1	1	1	1	1	2	2	1	1	1	1	1	1	1	1	1	1	2	1	1	1	2	1	2	2	1	2	2	2	2	2	1	2	2	2	2	2	1
1621	1	2	2	1	1	2	2	2	1	2	1	1	1	1	1	1	1	1	2	2	1	1	2	2	2	1	1	1	1	2	1	1	1	1	1	1	2	1
1622	1	1	2	1	1	2	2	1	1	1	1	1	1	1	1	1	1	1	1	2	1	1	1	1	2	1	1	1	1	1	2	2	2	1	1	1	1	1
1623	1	2	1	2	1	2	1	1	1	1	2	1	1	1	1	1	1	2	2	2	1	2	2	1	2	2	2	2	2	2	1	2	1	2	2	1	2	2
1624	1	1	1	1	1	2	2	1	1	2	1	1	1	1	1	1	1	1	2	2	1	1	2	2	2	2	2	2	2	2	2	1	1	2	2	1	2	2
1625	1	1	1	1	1	2	2	1	1	1	2	1	1	1	1	1	1	1	1	1	2	1	1	1	2	1	1	1	1	2	1	1	1	1	1	1	2	1
1626	1	2	1	1	1	2	1	1	1	2	1	1	1	1	1	1	1	1	2	2	1	1	2	2	2	2	2	2	2	1	1	1	1	2	2	1	1	1
1627	1	2	1	1	1	2	2	1	1	1	1	1	1	1	1	1	2	1	2	2	2	1	1	1	2	2	2	1	1	2	1	1	1	1	1	1	2	1
1628	1	2	1	2	1	1	1	1	1	2	2	1	1	1	1	1	1	2	2	2	2	2	2	2	2	2	2	2	1	2	2	2	1	2	2	1	1	1
1629	1	1	2	1	1	2	2	1	1	1	1	1	1	1	1	1	2	1	2	1	1	1	1	1	1	1	1	1	1	1	1	2	1	1	1	1	2	1
1630	1	1	1	1	1	2	2	1	2	1	1	1	1	1	1	1	1	2	1	1	2	2	1	2	2	2	2	1	1	1	1	1	1	2	1	1	2	2
1631	1	2	1	1	1	2	2	1	1	1	1	1	1	1	1	1	1	1	1	1	1	1	1	1	1	2	1	1	1	2	1	1	1	1	1	2	2	1
1632	1	2	2	2	1	2	2	1	1	1	1	1	1	1	1	1	1	2	1	1	1	2	2	2	2	2	1	2	1	2	2	2	2	2	2	2	2	2
1633	1	2	1	1	1	2	1	1	1	1	1	1	1	1	1	1	2	2	2	2	2	2	2	1	2	2	2	2	1	1	1	1	2	1	2	2	2	1
1634	1	1	2	2	1	2	2	1	1	1	1	2	1	1	1	1	1	1	1	2	2	2	2	2	2	2	2	2	2	2	2	1	2	2	2	2	2	2
1635	1	1	2	1	1	2	2	1	1	1	1	1	1	1	1	1	1	1	1	1	1	1	1	1	1	2	1	1	1	1	1	1	1	1	1	1	2	1
1636	1	2	2	2	1	2	2	1	1	1	1	1	1	1	1	1	2	1	2	2	2	1	2	2	2	2	2	2	2	2	1	1	1	1	1	2	2	2
1637	1	2	1	2	1	2	1	1	1	2	2	2	1	1	1	1	1	2	1	1	1	2	2	2	2	2	2	2	2	1	1	1	1	2	2	1	2	2
1638	1	1	2	1	1	2	2	1	1	1	1	1	1	1	1	1	1	1	1	2	1	1	1	1	2	2	2	1	1	1	1	2	2	1	1	1	1	1
1639	1	2	2	1	1	2	2	1	1	1	1	1	1	1	1	1	1	2	1	1	1	2	1	2	2	2	2	2	1	1	1	1	1	1	1	1	1	1
1640	1	2	2	1	1	2	2	1	1	1	1	1	1	2	1	1	2	2	1	1	2	2	1	1	2	2	2	2	2	1	2	1	1	2	2	2	2	1
1641	1	2	2	1	1	2	2	1	1	1	1	1	1	1	1	1	1	1	1	1	1	1	1	1	2	1	1	1	1	1	1	1	1	1	1	2	2	2
1642	1	2	2	2	2	2	2	1	2	2	2	2	1	1	1	1	2	1	1	1	2	1	2	2	2	2	2	1	2	2	2	1	1	2	2	1	2	2
1643	1	2	2	1	1	2	2	2	2	2	1	1	1	1	1	1	1	1	1	1	1	1	2	2	2	2	2	1	2	2	2	1	2	1	1	2	2	2
1644	1	2	2	2	1	2	2	1	1	2	1	1	2	1	1	1	2	1	1	2	1	1	2	2	2	2	2	2	2	1	2	1	1	2	2	1	2	2
1645	1	2	2	1	1	2	2	1	1	1	2	1	1	1	1	1	1	1	1	1	1	1	2	2	2	2	2	2	1	1	1	2	1	1	1	1	2	1
1646	1	1	1	1	2	2	2	1	1	2	1	1	1	1	1	1	1	2	1	1	1	1	1	2	2	2	1	1	1	2	1	1	1	1	1	1	1	1
1647	1	2	1	1	1	2	2	1	1	2	1	1	1	1	1	1	1	1	1	1	1	2	2	2	2	2	2	1	1	1	2	1	1	2	1	1	2	1
1648	1	2	2	2	1	2	2	1	1	2	1	2	2	1	1	1	1	2	1	1	1	2	2	2	2	2	2	2	1	2	2	1	1	1	1	2	2	2
1649	1	1	1	2	1	2	2	1	1	1	1	1	1	1	1	1	1	1	2	1	1	1	2	2	2	2	2	2	1	2	1	1	1	2	1	2	2	2
1650	1	2	2	2	1	2	2	1	1	1	2	1	1	1	1	1	1	2	2	2	2	2	2	1	2	2	2	2	2	2	2	1	1	2	2	2	2	2
1651	1	2	1	2	1	2	2	1	1	1	1	1	1	1	1	1	2	1	1	1	1	2	2	2	2	2	2	2	1	2	1	1	1	2	2	2	2	2
1652	1	2	2	2	1	2	2	1	1	1	1	1	1	2	1	1	1	1	1	1	2	1	2	2	2	2	2	2	2	1	2	2	2	2	2	2	2	2
1653	1	2	1	1	1	2	2	1	1	2	1	1	1	2	1	1	2	2	1	1	1	2	2	2	2	2	2	2	1	1	2	1	1	1	2	1	2	2
1654	1	2	1	1	1	2	2	1	2	1	1	1	1	1	1	1	1	1	1	1	1	2	1	1	1	1	1	1	1	1	1	1	1	1	1	1	1	1
1655	1	2	2	1	1	2	2	1	1	1	1	1	1	2	1	1	2	1	2	2	2	1	2	2	2	2	2	1	1	2	1	1	2	2	2	2	2	2
1656	1	1	1	1	1	2	2	1	1	1	1	1	1	1	1	1	1	1	1	1	1	1	2	1	2	2	2	1	1	2	2	1	1	1	1	1	2	1
1657	1	2	1	2	1	2	2	2	1	2	1	2	2	1	1	1	1	2	1	1	1	2	2	2	2	2	2	2	1	1	1	1	1	1	1	1	2	2
1658	1	2	2	2	1	2	2	1	1	1	1	1	1	1	2	1	2	1	1	1	1	1	2	2	2	2	2	2	2	2	1	2	2	2	2	2	2	2
1659	1	2	2	1	2	2	2	1	1	2	1	1	1	2	1	1	1	1	2	2	1	1	2	1	2	2	2	2	1	1	2	1	1	1	1	1	2	2
1660	1	2	2	1	1	2	2	2	1	1	1	1	1	2	1	1	2	1	2	2	1	1	1	1	2	1	1	2	2	2	1	1	1	2	2	2	2	2
1661	1	2	2	2	1	2	2	1	1	1	1	2	1	1	1	1	1	2	1	1	1	2	2	1	2	2	2	2	2	1	1	1	2	1	1	2	2	2
1662	1	1	2	2	1	2	2	1	1	2	1	2	1	1	1	1	1	2	2	1	1	2	2	2	2	2	2	2	2	1	1	1	1	1	1	1	2	2
1663	1	2	1	1	2	2	1	1	1	1	1	1	1	1	1	1	1	2	1	1	1	1	1	2	2	2	2	1	1	2	2	1	1	1	1	1	2	1
1664	1	2	2	1	1	2	2	2	1	2	1	1	1	2	1	1	1	2	1	1	1	2	1	1	2	1	1	1	1	1	1	1	1	1	1	1	2	1
1665	1	1	2	1	1	2	2	1	1	2	1	1	1	1	1	1	1	1	1	1	2	1	1	1	1	2	2	1	1	1	1	1	1	1	1	2	2	2
1666	1	2	2	2	1	2	2	1	1	2	1	2	1	1	2	1	1	1	1	1	1	1	1	2	2	2	2	1	2	1	1	1	1	2	2	1	2	2
1667	1	1	1	1	2	2	2	2	1	1	1	1	1	1	1	1	1	1	1	1	1	1	1	1	1	2	2	1	1	2	1	1	1	1	1	2	2	1
1668	1	2	2	1	1	2	2	1	1	1	1	1	1	2	2	1	2	1	2	2	1	1	2	2	2	2	2	2	2	2	1	1	1	1	1	2	2	1
1669	1	2	2	2	1	2	2	1	1	1	1	2	1	1	1	1	1	1	1	1	1	1	1	1	2	2	2	1	1	1	1	2	1	2	2	1	2	1
1670	1	1	1	1	1	2	2	1	2	1	1	1	1	1	1	1	2	1	1	1	1	1	1	2	2	1	1	2	1	2	1	1	2	1	1	1	2	1
1671	1	1	2	1	1	2	2	1	1	2	2	1	1	1	1	1	2	2	1	2	1	2	2	1	2	1	1	2	1	1	1	2	1	1	2	2	2	2
1672	2	2	1	1	1	2	2	1	1	1	1	1	2	2	2	1	2	2	2	2	2	2	2	2	2	2	2	2	2	2	1	1	1	2	2	2	2	2
1673	2	1	2	2	1	1	2	1	1	2	2	1	1	1	1	1	1	1	1	1	2	1	2	2	2	2	2	2	2	2	2	2	2	2	2	2	2	2
1674	2	2	2	2	1	2	2	1	1	2	1	1	1	1	2	1	2	1	1	1	1	1	2	2	2	2	2	2	2	2	1	2	2	2	2	2	2	2
1675	2	2	2	2	1	2	2	2	1	2	1	2	2	2	1	1	2	2	1	1	2	1	2	2	2	2	2	2	2	2	1	1	1	2	2	1	2	1
1676	2	2	2	2	1	2	2	2	1	2	1	2	1	2	1	1	1	1	2	1	1	1	2	2	2	2	2	2	1	2	1	1	1	2	2	1	2	2
1677	2	2	1	2	1	2	2	1	1	2	2	1	1	1	1	1	1	2	2	2	1	2	2	1	2	2	2	2	2	2	1	2	1	2	2	1	2	2
1678	2	2	2	2	1	2	2	2	1	1	2	2	1	1	1	1	1	2	2	2	2	2	2	2	2	2	2	2	2	1	1	1	1	2	2	2	2	2
1679	2	1	2	2	1	1	1	1	1	1	2	1	1	1	1	1	1	2	2	2	1	2	2	2	2	2	2	2	2	1	2	1	1	2	2	1	2	2
1680	2	2	2	2	1	2	2	2	1	2	1	1	1	1	2	1	1	2	2	2	2	2	2	2	2	2	2	2	2	1	1	1	1	1	1	1	2	2
1681	2	2	2	2	1	2	2	1	1	2	2	1	1	1	1	1	1	2	2	2	1	2	2	2	2	2	2	2	2	2	1	1	1	2	2	2	2	2
1682	2	2	2	2	2	2	2	1	1	1	1	2	1	1	2	1	2	1	2	2	2	1	2	2	2	2	2	2	2	2	2	1	2	2	1	2	2	2
1683	2	1	2	1	1	1	1	1	1	2	1	1	2	1	2	1	2	2	2	2	2	1	2	2	2	2	2	2	2	2	2	1	2	2	2	2	2	2
1684	2	2	2	2	1	1	1	2	1	2	1	1	1	1	2	1	1	2	2	2	2	2	2	2	2	2	2	2	2	1	2	2	2	2	2	2	2	2
1685	2	2	2	1	1	2	2	1	1	2	1	2	1	1	2	1	2	2	2	2	2	2	2	1	2	1	1	2	2	1	1	1	1	2	2	1	2	1
1686	2	2	2	2	1	2	2	1	1	2	2	2	1	1	2	1	2	2	1	1	2	2	2	1	2	2	2	2	2	1	1	2	2	1	1	2	2	2
1687	2	2	2	1	1	2	2	1	1	1	1	1	1	1	2	1	1	2	1	2	1	2	2	2	2	2	2	1	2	2	2	1	1	2	2	2	2	1
1688	2	2	2	1	1	2	2	1	1	1	2	2	1	1	1	1	1	2	2	2	2	1	1	1	2	2	2	2	2	2	1	1	1	2	1	1	1	1
1689	2	2	2	1	1	2	1	2	2	1	1	1	1	1	1	1	1	1	1	1	1	1	1	2	2	1	1	2	2	1	2	1	1	1	1	1	2	2
1690	2	1	1	1	1	2	2	1	1	2	1	1	1	1	1	1	1	1	1	1	1	1	1	1	1	2	2	2	1	2	2	1	1	1	1	2	2	1
1691	2	2	2	1	2	2	2	1	1	1	1	1	1	2	2	1	2	2	2	2	1	2	2	2	2	2	2	1	2	2	1	1	1	2	2	1	2	1
1692	2	1	2	1	1	2	1	1	1	1	1	1	1	1	1	1	1	1	1	1	1	1	2	1	2	2	2	1	2	1	1	1	1	2	1	2	2	1
1693	2	1	1	1	1	2	2	1	1	1	1	1	1	1	1	1	1	1	1	1	1	1	1	1	2	2	1	1	1	2	1	2	1	1	1	2	2	2

## Sheet: factors
Status	1=alive, 2=death
Age	1:<60 years; 2: ≧60 years
Sex	1=female, 2=male
Severe pneumonia	1=No, 2=Yes
Sore throat	1=No, 2=Yes
Cough	1=No, 2=Yes
Expectoration	1=No, 2=Yes
Poor appetite	1=No, 2=Yes
Muscular soreness	1=No, 2=Yes
Anhelation	1=No, 2=Yes
Dyspnea	1=No, 2=Yes
Respiratory failure	1=No, 2=Yes
Heart failure	1=No, 2=Yes
Cerebral infarction	1=No, 2=Yes
Anaemia	1=No, 2=Yes
Coagulation dysfunction	1=No, 2=Yes
Diabetes	1=No, 2=Yes
White blood cell (WBC)	1=Normal, 2=Abnormal
Erythrocyte (RBC)	1=Normal, 2=Abnormal
Hemoglobin (Hb)	1=Normal, 2=Abnormal
Platelet (PLT)	1=Normal, 2=Abnormal
Neutrophil (NEUT)	1=Normal, 2=Abnormal
Percentage of neutrophils (NEUT%)	1=Normal, 2=Abnormal
Lymphocyte (LYMP)	1=Normal, 2=Abnormal
Percentage of lymphocyte (LYMP%)	1=Normal, 2=Abnormal
Eosinophil (EO)	1=Normal, 2=Abnormal
Percentage of eosinophil (EO%)	1=Normal, 2=Abnormal
D-Dimer	1=Normal, 2=Abnormal
Procalcitonin (PCT)	1=Normal, 2=Abnormal
Creatinine (SCr)	1=Normal, 2=Abnormal
Uric acid (UA)	1=Normal, 2=Abnormal
Alanine aminotransferase (ALT)	1=Normal, 2=Abnormal
Aspartate aminotransferase (AST)	1=Normal, 2=Abnormal
Total protein (TP)	1=Normal, 2=Abnormal
Albumin (ALB)	1=Normal, 2=Abnormal
Creatine kinase (CK)	1=Normal, 2=Abnormal
Creatine kinase isoenzymes (CK-MB)	1=Normal, 2=Abnormal
Lactate dehydrogenase (LDH)	1=Normal, 2=Abnormal
