# Supplementary material for: Study on the mortality risk and predictive model for COVID-19 inpatients with pneumonia manifestations
Source: PeerJ journal article supplement (doi:10.7717/peerj.20795), 2026-02-10
Supplement: SupplementaryTables.docx [file SupplementaryTables.docx]

| **Table S1. Association between symptoms of pneumonia of COVID-19 and risk of death** | | | | | |
| --- | --- | --- | --- | --- | --- |
|  | **Total**  **(N=1693)** | **Alive**  **(N=1593)** | **Dead**  **(N=100)** | **Adjusted OR (95% CI)*** | ***P**** |
| **Fever** |  |  |  |  | 0.077 |
| No | 607 (35.9%) | 579 (36.3%) | 28 (28.0%) | 1.00 (ref.) |  |
| Yes | 1086 (64.1%) | 1014 (63.7%) | 72 (72.0%) | 1.51 (0.97, 2.42) |  |
| **Sore throat** |  |  |  |  | 0.009 |
| No | 1371 (81.0%) | 1277 (80.2%) | 94 (94.0%) | 1.00 (ref.) |  |
| Yes | 322 (19.0%) | 316 (19.8%) | 6 (6.00%) | 0.32 (0.12, 0.69) |  |
| **Cough** |  |  |  |  | <0.001 |
| No | 174 (10.3%) | 155 (9.7%) | 19 (19.0%) | 1.00 (ref.) |  |
| Yes | 1519 (89.7%) | 1438 (90.3%) | 81 (81.0%) | 0.31 (0.18, 0.55) |  |
| **Expectoration** |  |  |  |  | 0.005 |
| No | 396 (23.4%) | 367 (23.0%) | 29 (29.0%) | 1.00 (ref.) |  |
| Yes | 1297 (76.6%) | 1226 (77.0%) | 71 (71.0%) | 0.51 (0.32, 0.82) |  |
| **Weakness** |  |  |  |  | 0.073 |
| No | 1169 (69.0%) | 1109 (69.6%) | 60 (60.0%) | 1.00 (ref.) |  |
| Yes | 524 (31.0%) | 484 (30.4%) | 40 (40.0%) | 1.48 (0.96, 2.25) |  |
| **Poor appetite** |  |  |  |  | 0.020 |
| No | 1435 (84.8%) | 1364 (85.6%) | 71 (71.0%) | 1.00 (ref.) |  |
| Yes | 258 (15.2%) | 229 (14.4%) | 29 (29.0%) | 1.74 (1.08, 2.75) |  |
| **Muscular soreness** |  |  |  |  | 0.025 |
| No | 1457 (86.1%) | 1362 (85.5%) | 95 (95.0%) | 1.00 (ref.) |  |
| Yes | 236 (13.9%) | 231 (14.5%) | 5 (5.0%) | 0.35 (0.12, 0.79) |  |
| **Chest distress** |  |  |  |  | 0.672 |
| No | 1374 (81.2%) | 1298 (81.5%) | 76 (76.0%) | 1.00 (ref.) |  |
| Yes | 319 (18.8%) | 295 (18.5%) | 24 (24.0%) | 1.11 (0.67, 1.78) |  |
| **Anhelation** |  |  |  |  | 0.001 |
| No | 1259 (74.4%) | 1209 (75.9%) | 50 (50.0%) | 1.00 (ref.) |  |
| Yes | 434 (25.6%) | 384 (24.1%) | 50 (50.0%) | 2.03 (1.33, 3.11) |  |
| **Dyspnea** |  |  |  |  | <0.001 |
| No | 1556 (91.9%) | 1483 (93.1%) | 73 (73.0%) | 1.00 (ref.) |  |
| Yes | 137 (8.1%) | 110 (6.9%) | 27 (27.0%) | 3.70 (2.21, 6.05) |  |
| *Multivariate logistic regression corrected by age and sex.  OR: Odds ratio; 95% CI: 95% confidence interval. | | | | | |

| **Table S2. Association between complication of COVID-19 and risk of death** | | | | | |
| --- | --- | --- | --- | --- | --- |
|  | **Total**  **(N=1693)** | **Alive**  **(N=1593)** | **Dead**  **(N=100)** | **Adjusted OR (95% CI)*** | ***P**** |
| **Severe pneumonia** |  |  |  |  | <0.001 |
| No | 1506 (89.0%) | 1476 (92.7%) | 30 (30.0%) | 1.00 (ref.) |  |
| Yes | 187 (11.0%) | 117 (7.34%) | 70 (70.0%) | 20.04 (12.45, 32.96) |  |
| **Respiratory failure** |  |  |  |  | <0.001 |
| No | 1497 (88.4%) | 1459 (91.6%) | 38 (38.0%) | 1.00 (ref.) |  |
| Yes | 196 (11.6%) | 134 (8.4%) | 62 (62.0%) | 11.60 (7.36, 18.49) |  |
| **Heart failure** |  |  |  |  | <0.001 |
| No | 1644 (97.1%) | 1563 (98.1%) | 81 (81.0%) | 1.00 (ref.) |  |
| Yes | 49 (2.9%) | 30 (1.9%) | 19 (19.0%) | 7.86 (4.11, 14.78) |  |
| **Chronic renal failure** |  |  |  |  | 0.516 |
| No | 1663 (98.2%) | 1566 (98.3%) | 97 (97.0%) | 1.00 (ref.) |  |
| Yes | 30 (1.77%) | 27 (1.69%) | 3 (3.00%) | 1.51 (0.35, 4.52) |  |
| **Lung cancer** |  |  |  |  | 0.848 |
| No | 1671 (98.7%) | 1573 (98.7%) | 98 (98.0%) | 1.00 (ref.) |  |
| Yes | 22 (1.30%) | 20 (1.26%) | 2 (2.00%) | 1.16 (0.18, 4.23) |  |
| **Emphysema** |  |  |  |  | 0.171 |
| No | 1633 (96.5%) | 1536 (96.4%) | 97 (97.0%) | 1.00 (ref.) |  |
| Yes | 60 (3.54%) | 57 (3.58%) | 3 (3.00%) | 0.44 (0.1, 1.22) |  |
| **Bulla pulmonis** |  |  |  |  | 0.465 |
| No | 1648 (97.3%) | 1553 (97.5%) | 95 (95.0%) | 1.00 (ref.) |  |
| Yes | 45 (2.66%) | 40 (2.51%) | 5 (5.00%) | 1.44 (0.48, 3.51) |  |
| **Pleural effusion** |  |  |  |  | 0.11 |
| No | 1614 (95.3%) | 1525 (95.7%) | 89 (89.0%) | 1.00 (ref.) |  |
| Yes | 79 (4.67%) | 68 (4.27%) | 11 (11.0%) | 1.75 (0.84, 3.36) |  |
| **Cerebral infarction** |  |  |  |  | 0.012 |
| No | 1553 (91.7%) | 1475 (92.6%) | 78 (78.0%) | 1.00 (ref.) |  |
| Yes | 140 (8.27%) | 118 (7.41%) | 22 (22.0%) | 1.95 (1.14, 3.25) |  |
| **COPD** |  |  |  |  | 0.197 |
| No | 1631 (96.3%) | 1535 (96.4%) | 96 (96.0%) | 1.00 (ref.) |  |
| Yes | 62 (3.66%) | 58 (3.64%) | 4 (4.00%) | 0.50 (0.15, 1.27) |  |
| **History of tuberculosis** |  |  |  |  | 0.668 |
| No | 1603 (94.7%) | 1510 (94.8%) | 93 (93.0%) | 1.00 (ref.) |  |
| Yes | 90 (5.32%) | 83 (5.21%) | 7 (7.00%) | 1.20 (0.48, 2.57) |  |
| **Pulmonary nodule** |  |  |  |  | 0.334 |
| No | 1659 (98.0%) | 1560 (97.9%) | 99 (99.0%) | 1.00 (ref.) |  |
| Yes | 34 (2.01%) | 33 (2.07%) | 1 (1.00%) | 0.37 (0.02, 1.79) |  |

| **Table S2. Association between complication of COVID-19 and risk of death (Continued)** | | | | | | |
| --- | --- | --- | --- | --- | --- | --- |
|  | **Total**  **(N=1693)** | **Alive**  **(N=1593)** | **Dead**  **(N=100)** | **Adjusted OR (95% CI)*** | ***P**** | |
| **Arhythmia** |  |  |  |  | | 0.179 |
| No | 1636 (96.6%) | 1544 (96.9%) | 92 (92.0%) | 1.00 (ref.) | |  |
| Yes | 57 (3.4%) | 49 (3.1%) | 8 (8.0%) | 1.72 (0.73, 3.61) | |  |
| **Hypoxemia** |  |  |  |  | | 0.982 |
| No | 1660 (98.1%) | 1560 (97.9%) | 100 (100%) | 1.00 (ref.) | |  |
| Yes | 33 (1.95%) | 33 (2.07%) | 0 (0.00%) | - | |  |
| **Anaemia** |  |  |  |  | | <0.001 |
| No | 1521 (89.8%) | 1448 (90.9%) | 73 (73.0%) | 1.00 (ref.) | |  |
| Yes | 172 (10.2%) | 145 (9.10%) | 27 (27.0%) | 2.65 (1.6, 4.27) | |  |
| **Coagulation dysfunction** |  |  |  |  | | 0.001 |
| No | 1675 (98.9%) | 1581 (99.2%) | 94 (94.0%) | 1.00 (ref.) | |  |
| Yes | 18 (1.06%) | 12 (0.75%) | 6 (6.00%) | 5.62 (1.87, 15.37) | |  |
| **Leukopenia** |  |  |  |  | | 0.590 |
| No | 1671 (98.7%) | 1573 (98.7%) | 98 (98.0%) | 1.00 (ref.) | |  |
| Yes | 22 (1.30%) | 20 (1.26%) | 2 (2.00%) | 1.51 (0.23, 5.58) | |  |
| **Atherosclerosis** |  |  |  |  | | 0.059 |
| No | 1613 (95.3%) | 1524 (95.7%) | 89 (89.0%) | 1.00 (ref.) | |  |
| Yes | 80 (4.73%) | 69 (4.33%) | 11 (11.0%) | 1.94 (0.93, 3.73) | |  |
| **Coronary heart disease** |  |  |  |  | | 0.107 |
| No | 1584 (93.6%) | 1499 (94.1%) | 85 (85.0%) | 1.00 (ref.) | |  |
| Yes | 109 (6.44%) | 94 (5.90%) | 15 (15.0%) | 1.64 (0.87, 2.91) | |  |
| **Hypertension** |  |  |  |  | | 0.127 |
| No | 1169 (69.0%) | 1121 (70.4%) | 48 (48.0%) | 1.00 (ref.) | |  |
| Yes | 524 (31.0%) | 472 (29.6%) | 52 (52.0%) | 1.40 (0.91, 2.16) | |  |
| **Diabetes** |  |  |  |  | | 0.012 |
| No | 1423 (84.1%) | 1355 (85.1%) | 68 (68.0%) | 1.00 (ref.) | |  |
| Yes | 270 (15.9%) | 238 (14.9%) | 32 (32.0%) | 1.80 (1.13, 2.81) | |  |
| *Multivariate logistic regression corrected by age and sex.  OR: Odds ratio; 95% CI: 95% confidence interval; COPD: Chronic obstructive pulmonary disease. | | | | | | |

| **Table S3. Association between blood indicators of COVID-19 and risk of death** | | | | | | |
| --- | --- | --- | --- | --- | --- | --- |
|  | **Total**  **(N=1693)** | **Alive**  **(N=1593)** | **Dead**  **(N=100)** | **Adjusted OR (95% CI)*** | ***P**** | |
| **White blood cell (WBC)** |  |  |  |  | | <0.001 |
| Normal | 1145 (67.6%) | 1103 (69.2%) | 42 (42.0%) | 1.00 (ref.) | |  |
| Abnormal | 548 (32.4%) | 490 (30.8%) | 58 (58.0%) | 2.85 (1.87, 4.35) | |  |
| **Erythrocyte (RBC)** |  |  |  |  | | 0.033 |
| Normal | 1105 (65.3%) | 1053 (66.1%) | 52 (52.0%) | 1.00 (ref.) | |  |
| Abnormal | 588 (34.7%) | 540 (33.9%) | 48 (48.0%) | 1.57 (1.04, 2.38) | |  |
| **Hemoglobin (Hb)** |  |  |  |  | | <0.001 |
| Normal | 1051 (62.1%) | 1009 (63.3%) | 42 (42.0%) | 1.00 (ref.) | |  |
| Abnormal | 642 (37.9%) | 584 (36.7%) | 58 (58.0%) | 2.22 (1.46, 3.39) | |  |
| **Platelet (PLT)** |  |  |  |  | | 0.005 |
| Normal | 1329 (78.5%) | 1267 (79.5%) | 62 (62.0%) | 1.00 (ref.) | |  |
| Abnormal | 364 (21.5%) | 326 (20.5%) | 38 (38.0%) | 1.87 (1.21, 2.87) | |  |
| **Neutrophil (NEUT)** |  |  |  |  | | <0.001 |
| Normal | 1140 (67.3%) | 1095 (68.7%) | 45 (45.0%) | 1.00 (ref.) | |  |
| Abnormal | 553 (32.7%) | 498 (31.3%) | 55 (55.0%) | 2.57 (1.69, 3.91) | |  |
| **Percentage of neutrophils (NEUT%)** |  |  |  |  | | <0.001 |
| Normal | 867 (51.2%) | 851 (53.4%) | 16 (16.0%) | 1.00 (ref.) | |  |
| Abnormal | 826 (48.8%) | 742 (46.6%) | 84 (84.0%) | 5.06 (3.00, 9.07) | |  |
| **Lymphocyte (LYMP)** |  |  |  |  | | <0.001 |
| Normal | 929 (54.9%) | 908 (57.0%) | 21 (21.0%) | 1.00 (ref.) | |  |
| Abnormal | 764 (45.1%) | 685 (43.0%) | 79 (79.0%) | 3.65 (2.25, 6.17) | |  |
| **Percentage of lymphocyte (LYMP%)** |  |  |  |  | | 0.001 |
| Normal | 539 (31.8%) | 531 (33.3%) | 8 (8.00%) | 1.00 (ref.) | |  |
| Abnormal | 1154 (68.2%) | 1062 (66.7%) | 92 (92.0%) | 3.55(1.79,8.11) | |  |
| **Monocyte (MONO)** |  |  |  |  | | 0.782 |
| Normal | 1533 (90.5%) | 1445 (90.7%) | 88 (88.0%) | 1.00 (ref.) | |  |
| Abnormal | 160 (9.45%) | 148 (9.29%) | 12 (12.0%) | 1.09 (0.55, 2.01) | |  |
| **Percentage of monocyte (MONO%)** |  |  |  |  | | 0.889 |
| Normal | 977 (57.7%) | 918 (57.6%) | 59 (59.0%) | 1.00 (ref.) | |  |
| Abnormal | 716 (42.3%) | 675 (42.4%) | 41 (41.0%) | 0.97 (0.63, 1.47) | |  |
| **Eosinophil (EO)** |  |  |  |  | | <0.001 |
| Normal | 556 (32.8%) | 546 (34.3%) | 10 (10.0%) | 1.00(ref.) | |  |
| Abnormal | 1137 (67.2%) | 1047 (65.7%) | 90 (90.0%) | 4.09(2.2,8.49) | |  |

| **Table S3. Association between blood indicators of COVID-19 and risk of death (Continued)** | | | | | | |
| --- | --- | --- | --- | --- | --- | --- |
|  | **Total**  **(N=1693)** | **Alive**  **(N=1593)** | **Dead**  **(N=100)** | **Adjusted OR (95% CI)*** | ***P**** | |
| **Percentage of eosinophil (EO%)** |  |  |  |  | | <0.001 |
| Normal | 765 (45.2%) | 752 (47.2%) | 13 (13.0%) | 1.00 (ref.) | |  |
| Abnormal | 928 (54.8%) | 841 (52.8%) | 87 (87.0%) | 4.94 (2.81, 9.39) | |  |
| **Basophil (BASO)** |  |  |  |  | | 0.121 |
| Normal | 1682 (99.4%) | 1584 (99.4%) | 98 (98.0%) | 1.00 (ref.) | |  |
| Abnormal | 11 (0.65%) | 9 (0.56%) | 2 (2.00%) | 3.65 (0.52, 16.25) | |  |
| **Percentage of basophil (BASO%)** |  |  |  |  | | 0.645 |
| Normal | 1664 (98.3%) | 1565 (98.2%) | 99 (99.0%) | 1.00 (ref.) | |  |
| Abnormal | 29 (1.71%) | 28 (1.76%) | 1 (1.00%) | 0.62 (0.03, 3.12) | |  |
| **D-Dimer** |  |  |  |  | | <0.001 |
| Normal | 1197 (70.7%) | 1178 (73.9%) | 19 (19.0%) | 1.00 (ref.) | |  |
| Abnormal | 496 (29.3%) | 415 (26.1%) | 81 (81.0%) | 7.72 (4.62, 13.52) | |  |
| **Procalcitonin (PCT)** |  |  |  |  | | <0.001 |
| Normal | 1117 (66.0%) | 1093 (68.6%) | 24 (24.0%) | 1.00 (ref.) | |  |
| Abnormal | 576 (34.0%) | 500 (31.4%) | 76 (76.0%) | 4.75 (2.96, 7.88) | |  |
| **Creatinine (SCr)** |  |  |  |  | | <0.001 |
| Normal | 1049 (62.0%) | 1003 (63.0%) | 46 (46.0%) | 1.00 (ref.) | |  |
| Abnormal | 644 (38.0%) | 590 (37.0%) | 54 (54.0%) | 2.15 (1.41, 3.29) | |  |
| **Uric acid (UA)** |  |  |  |  | | 0.004 |
| Normal | 1360 (80.3%) | 1295 (81.3%) | 65 (65.0%) | 1.00 (ref.) | |  |
| Abnormal | 333 (19.7%) | 298 (18.7%) | 35 (35.0%) | 1.92 (1.23, 2.97) | |  |
| **Alanine aminotransferase (ALT)** |  |  |  |  | | 0.003 |
| Normal | 1504 (88.8%) | 1427 (89.6%) | 77 (77.0%) | 1.00 (ref.) | |  |
| Abnormal | 189 (11.2%) | 166 (10.4%) | 23 (23.0%) | 2.17 (1.28, 3.57) | |  |
| **Aspartate aminotransferase (AST)** |  |  |  |  | | 0.001 |
| Normal | 1401 (82.8%) | 1335 (83.8%) | 66 (66.0%) | 1.00 (ref.) | |  |
| Abnormal | 292 (17.2%) | 258 (16.2%) | 34 (34.0%) | 2.19 (1.39, 3.4) | |  |
| **Total protein (TP)** |  |  |  |  | | <0.001 |
| Normal | 1240 (73.2%) | 1200 (75.3%) | 40 (40.0%) | 1.00 (ref.) | |  |
| Abnormal | 453 (26.8%) | 393 (24.7%) | 60 (60.0%) | 3.07 (2.01, 4.75) | |  |
| **Albumin (ALB)** |  |  |  |  | | <0.001 |
| Normal | 1233 (72.8%) | 1200 (75.3%) | 33 (33.0%) | 1.00 (ref.) | |  |
| Abnormal | 460 (27.2%) | 393 (24.7%) | 67 (67.0%) | 3.66 (2.34, 5.83) | |  |
| **Creatine kinase (CK)** |  |  |  |  | | <0.001 |
| Normal | 1081 (63.9%) | 1046 (65.7%) | 35 (35.0%) | 1.00 (ref.) | |  |
| Abnormal | 612 (36.1%) | 547 (34.3%) | 65 (65.0%) | 2.51 (1.63, 3.92) | |  |

| **Table S3. Association between blood indicators of COVID-19 and risk of death (Continued)** | | | | | | |
| --- | --- | --- | --- | --- | --- | --- |
|  | **Total**  **(N=1693)** | **Alive**  **(N=1593)** | **Dead**  **(N=100)** | **Adjusted OR (95% CI)*** | ***P**** | |
| **Creatine kinase isoenzymes (CK-MB)** |  |  |  |  | | 0.003 |
| Normal | 808 (47.7%) | 786 (49.3%) | 22 (22.0%) | 1.00 (ref.) | |  |
| Abnormal | 885 (52.3%) | 807 (50.7%) | 78 (78.0%) | 2.13 (1.31, 3.59) | |  |
| **Lactate dehydrogenase (LDH)** |  |  |  |  | | <0.001 |
| Normal | 1179 (69.6%) | 1151 (72.3%) | 28 (28.0%) | 1.00 (ref.) | |  |
| Abnormal | 514 (30.4%) | 442 (27.7%) | 72 (72.0%) | 4.65 (2.96, 7.49) | |  |
| *Multivariate logistic regression corrected by age and sex.  OR: Odds ratio; 95% CI: 95% confidence interval. | | | | | | |

| **Table S4. Association between demographic characteristics of COVID-19 and risk of death** | | | | | |
| --- | --- | --- | --- | --- | --- |
|  | **Total**  **(N=1693)** | **Alive**  **(N=1593)** | **Dead**  **(N=100)** | **Adjusted OR (95% CI)*** | ***P**** |
| **Age (year)** | 59.1± 22.0 | 58.1± 22.0 | 75.8±13.1 |  |  |
| **Age (year)** |  |  |  |  | <0.001 |
| <60 | 552 (47.0%) | 785 (49.9%) | 11 (11.0%) | 1.00 (ref.) |  |
| ≧60 | 897 (53.0%) | 808 (50.7%) | 89 (89.0%) | 7.64 (4.23, 15.26) |  |
| **Sex** |  |  |  |  | 0.001 |
| female | 698 (41.2%) | 674 (42.3%) | 24 (24.0%) | 1.00 (ref.) |  |
| male | 995 (58.8%) | 919 (57.7%) | 76 (76.0%) | 2.18 (1.38, 3.58) |  |
| *Multivariate logistic regression corrected by age and sex.  OR: Odds ratio; 95% CI: 95% confidence interval. | | | | | |

| **Table S5. Optimal value of hyper-parameter of machine learning models** | | |
| --- | --- | --- |
| **Model** | **Hyper-parameter tuning protocol** | **Optimal parameter*** |
| **RF** | ntrees = c(25,50,75,100,125,150,200,300,400);  max_depth = c(10,15,20,25,30);  mtries = c(2,5,8,10,15) | ntrees = 300；  max_depth =20;  mtries = 10 |
| **GBM** | ntrees = c(25,50,75,100,125,150,175,200,300,400);  learn_rate = c(0.001,0.01, 0.05, 0.1);  max_depth = c(5,10,15,20,25) | ntrees = 125;  learn_rate = 0.1;  max_depth =20 |
| **EN** | alpha = c(0.1,0.3,0.5,0.7,0.9);  lambda = c(0.001,0.01,0.05,0.1,1) | alpha = 0.7;  lambda = 0.1 |
| RF: Random Forest; GBM: Gradient Boosting Machine; EN: Elastic Net.  *The optimal parameters were selected based on the values of the area under the curve (AUC) obtained via the hyper-parameter tuning protocol. | | |
